# Supplementary material
Source: ML conference proceedings conference paper supplement (https://openreview.net/forum?id=rcUN78Ij9x5)

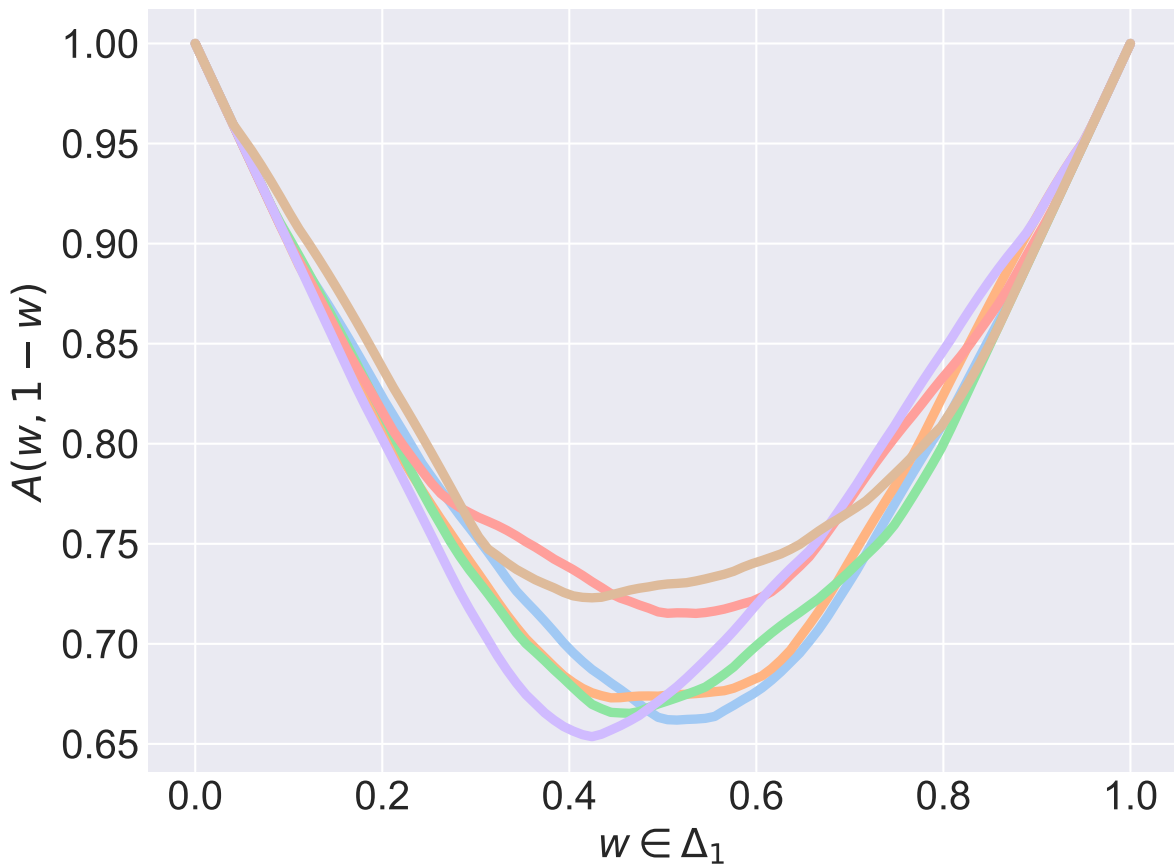

Supplement: supplementary_material [file attachment]

$d = 256$ 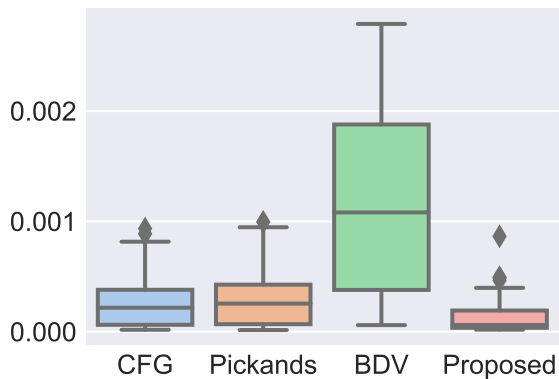 $d = 512$ 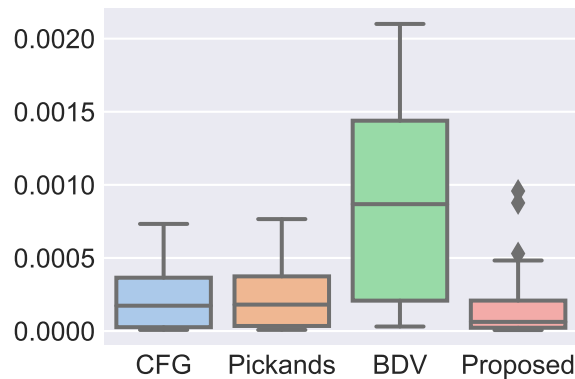 $d = 784$ 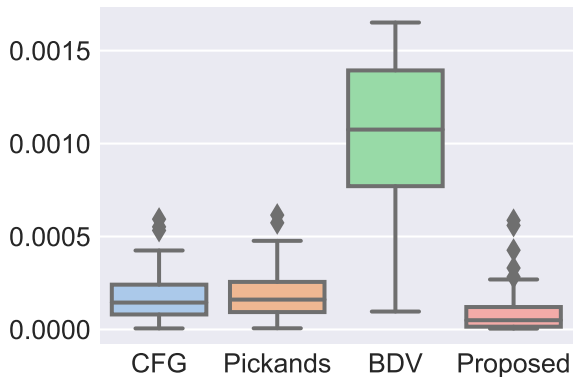 $d = 1024$ 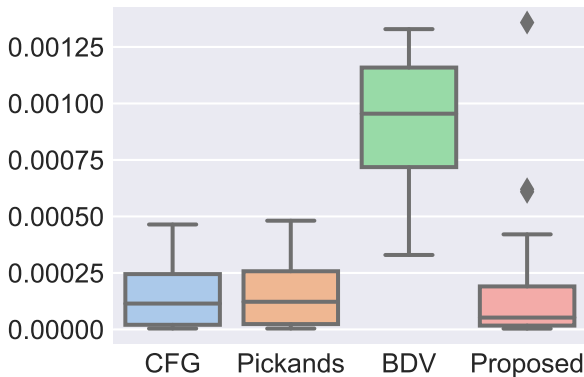

Supplement: supplementary_material [file attachment]

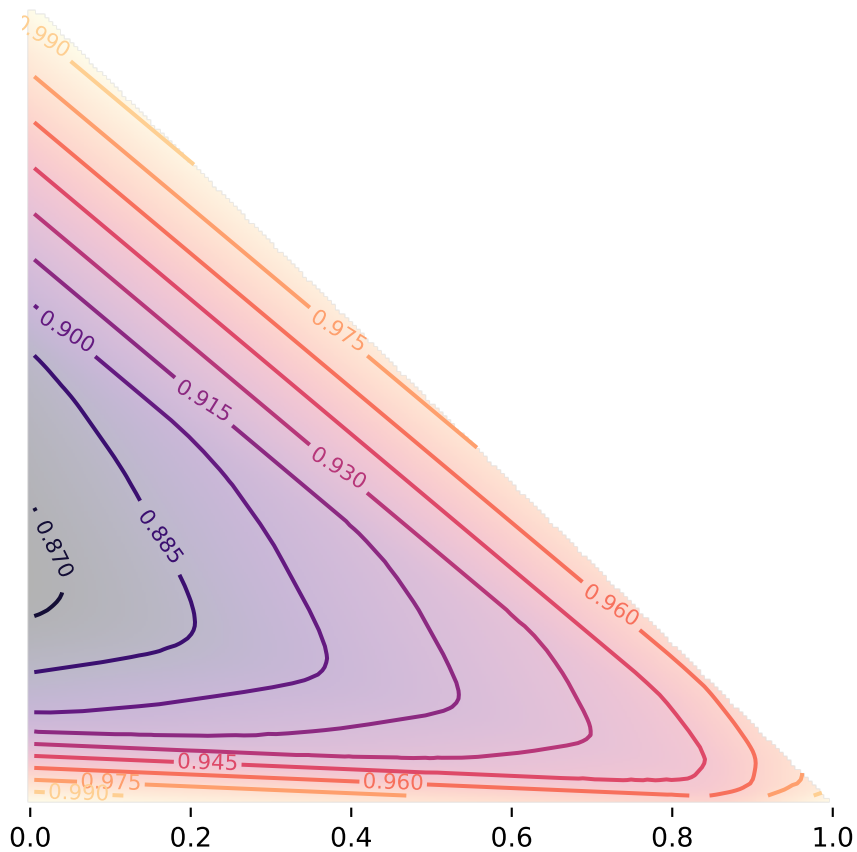

Supplement: supplementary_material [file attachment]

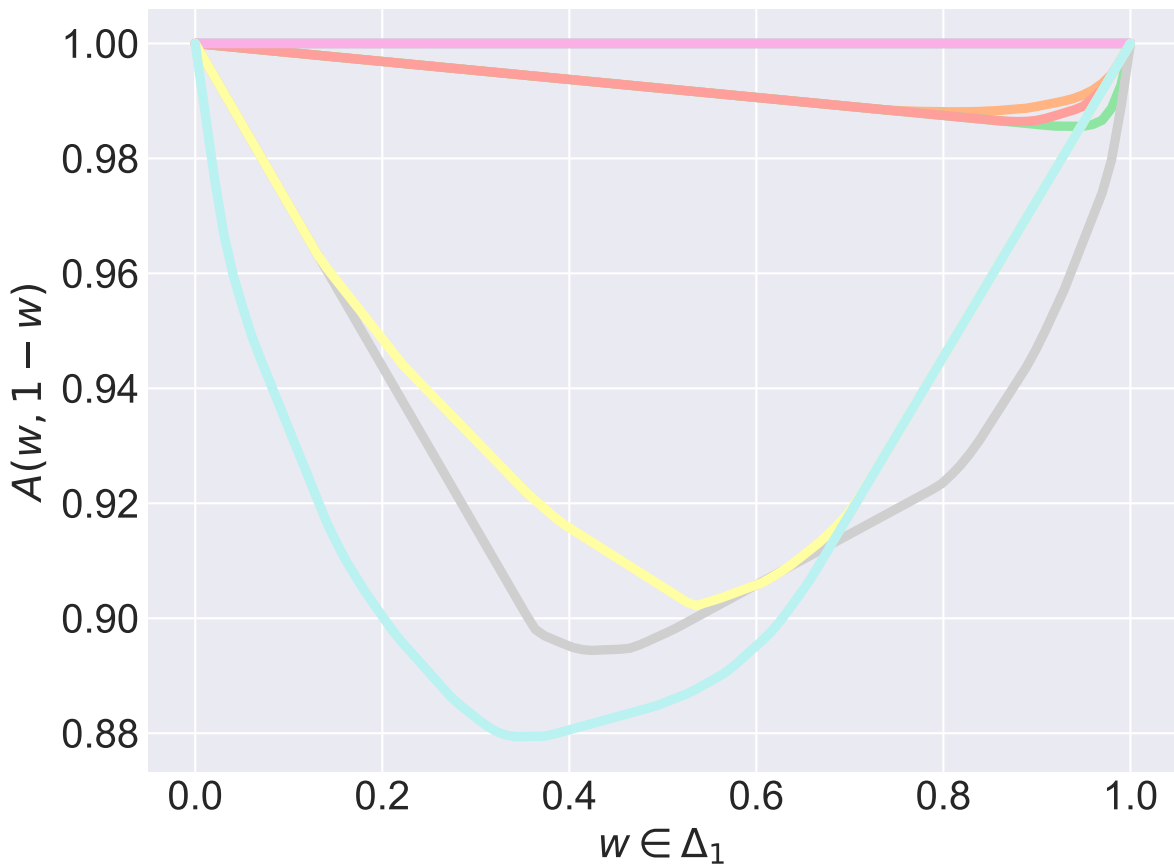

Supplement: supplementary_material [file attachment]

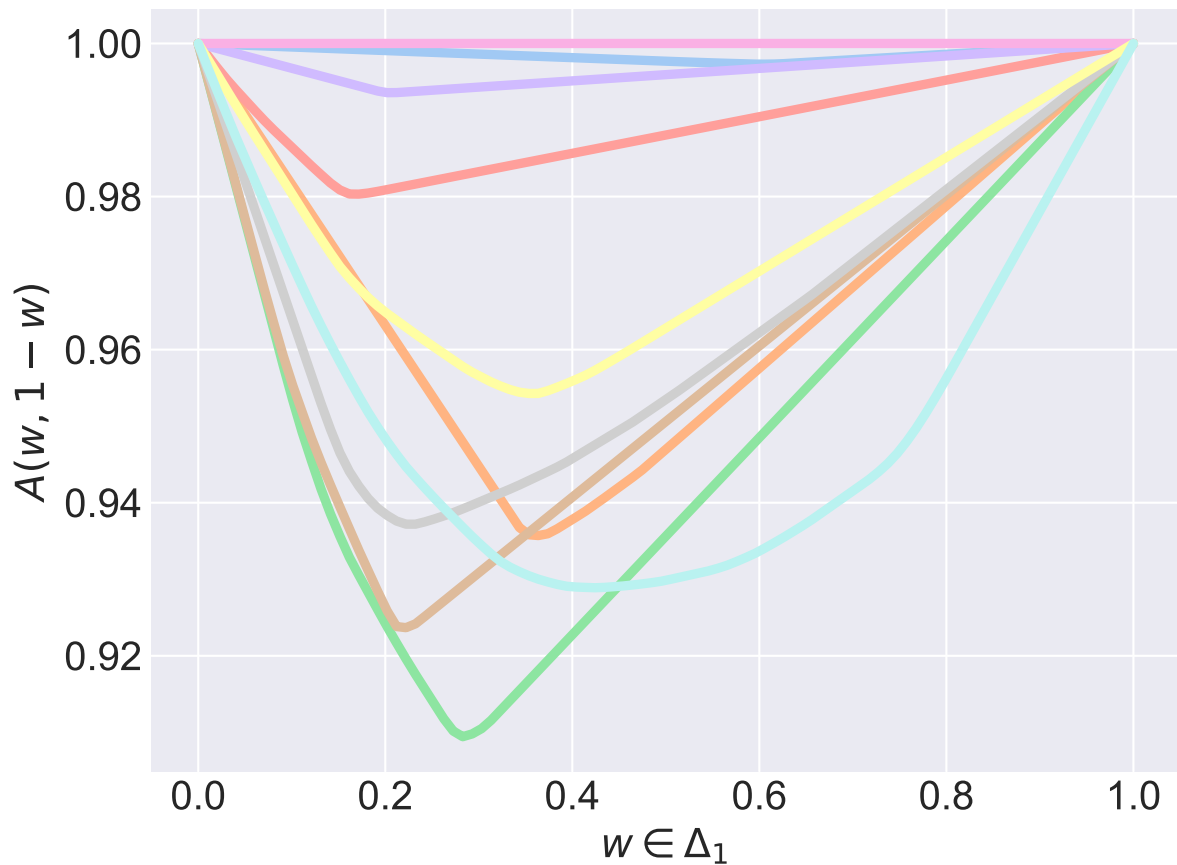

Supplement: supplementary_material [file attachment]

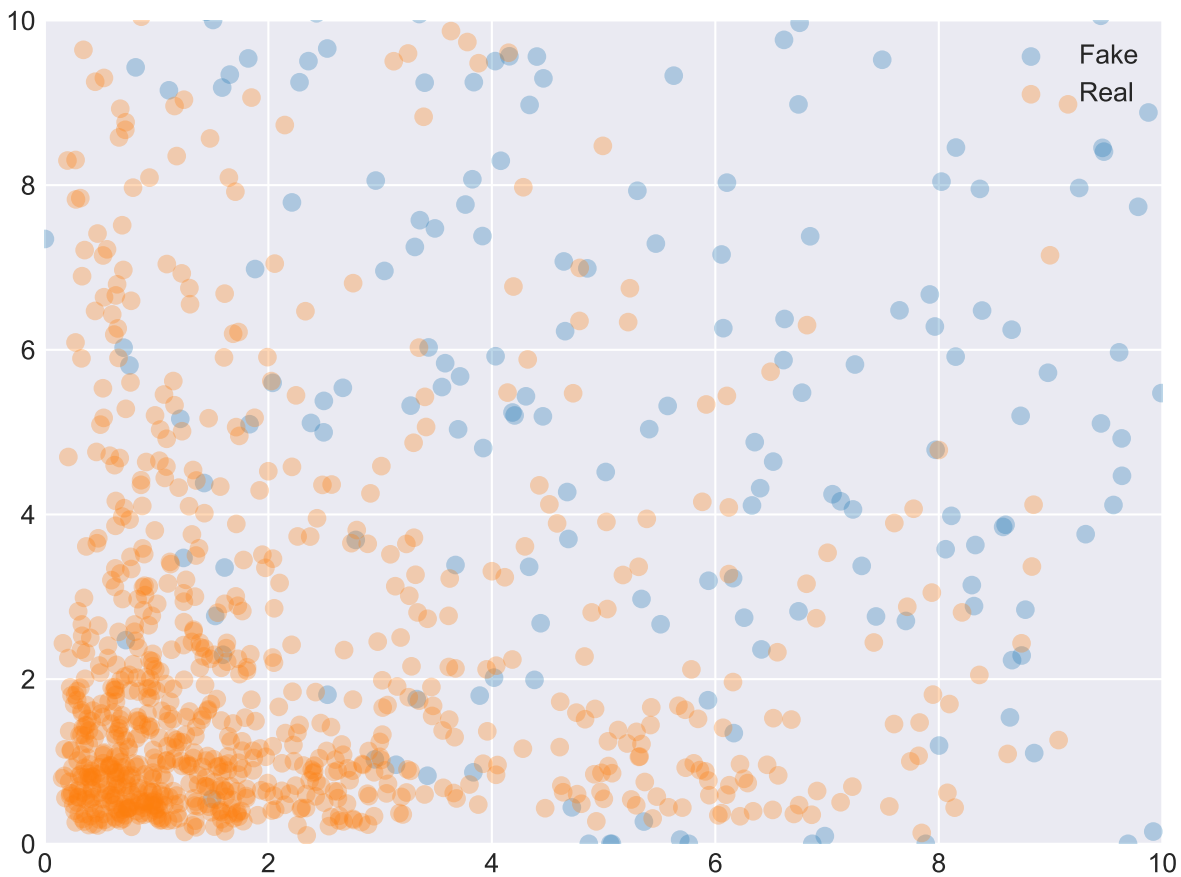

Supplement: supplementary_material [file attachment]

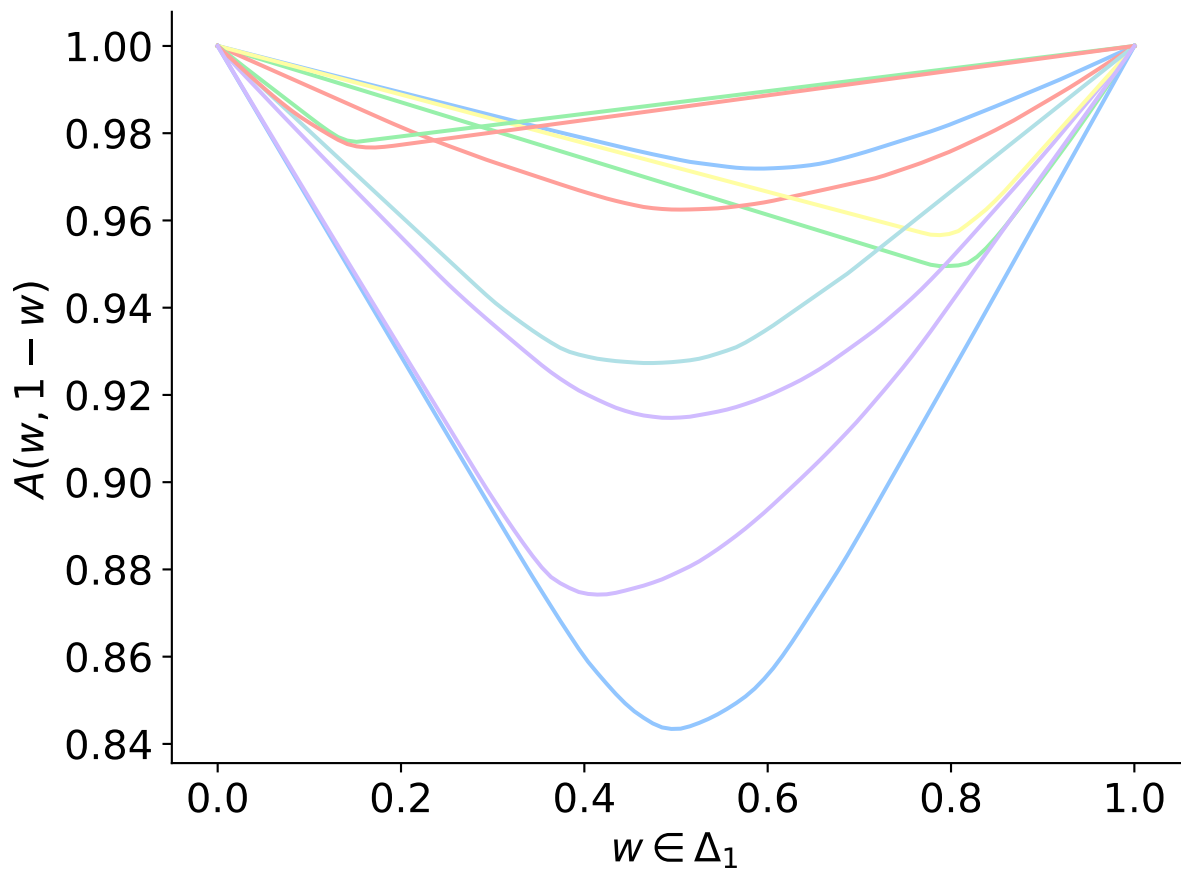

Supplement: supplementary_material [file attachment]

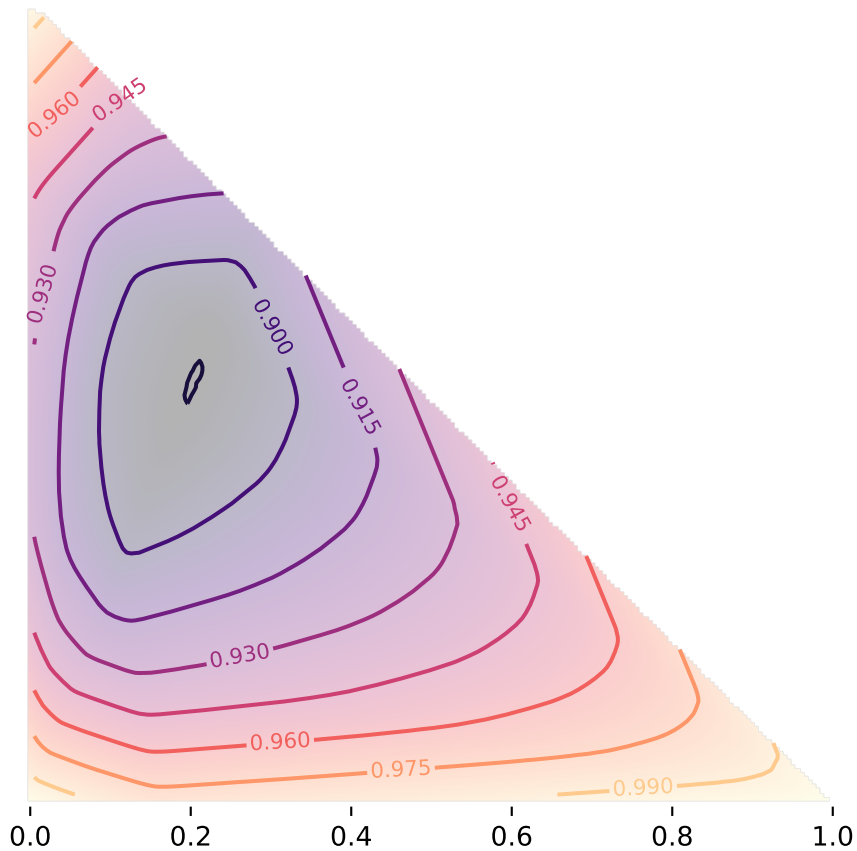

Supplement: supplementary_material [file attachment]

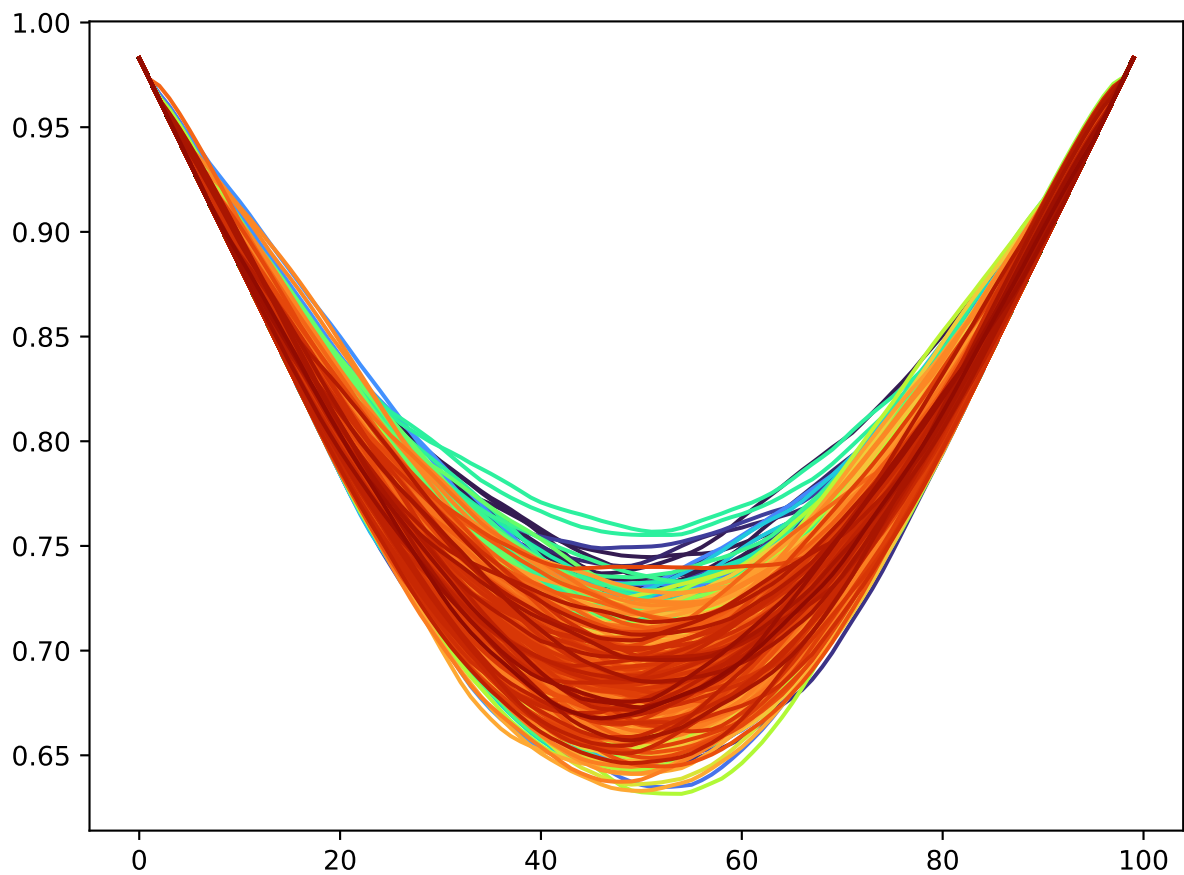

Supplement: supplementary_material [file attachment]

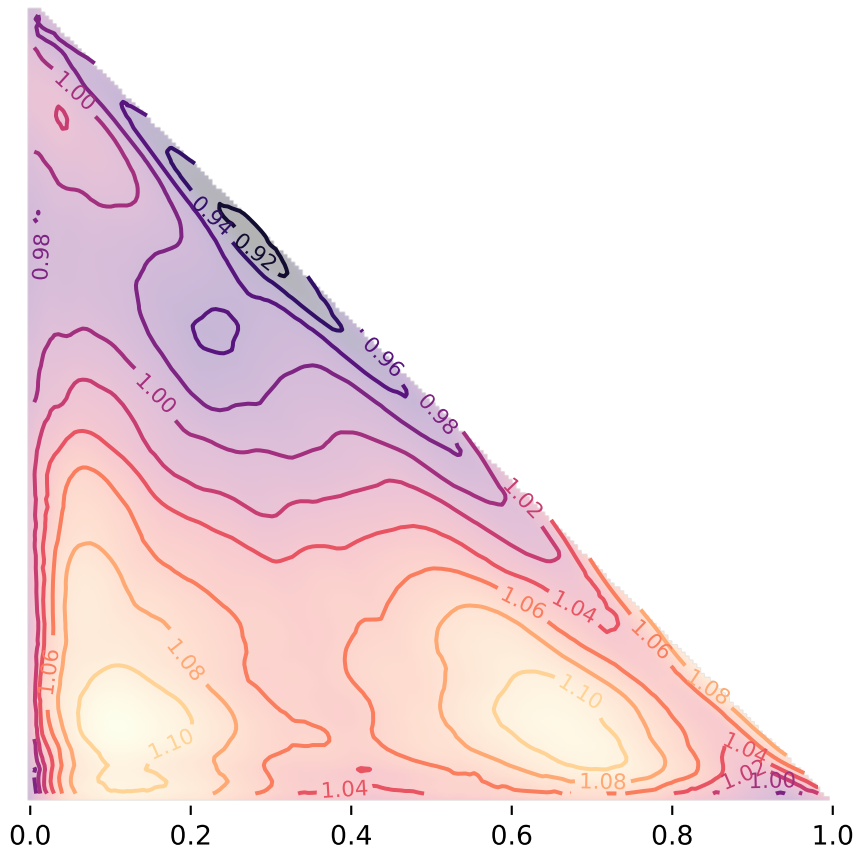

Supplement: supplementary_material [file attachment]

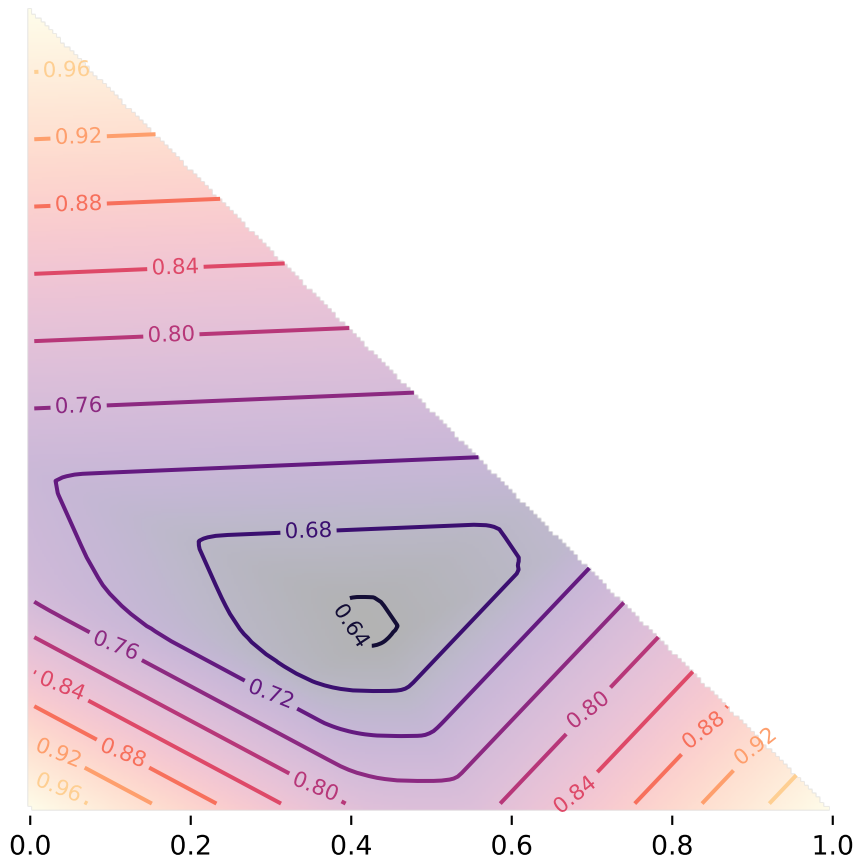

Supplement: supplementary_material [file attachment]

$\alpha = 0.25$

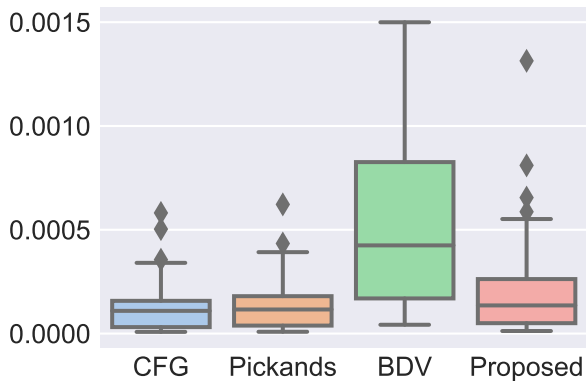

$\alpha = 0.5$

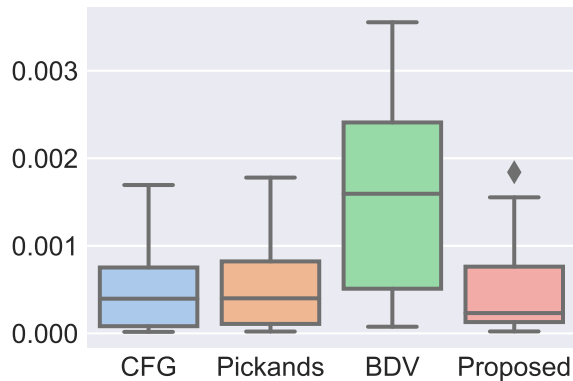

$\alpha = 0.75$

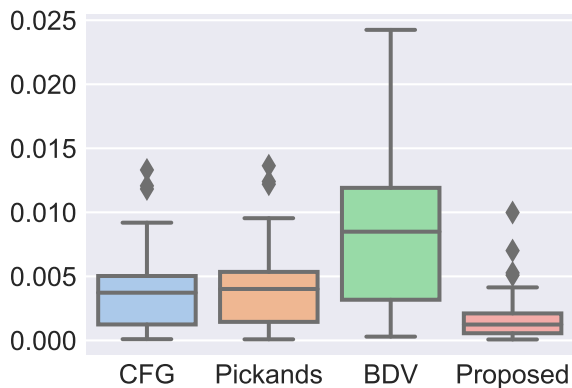

$\alpha = 1$

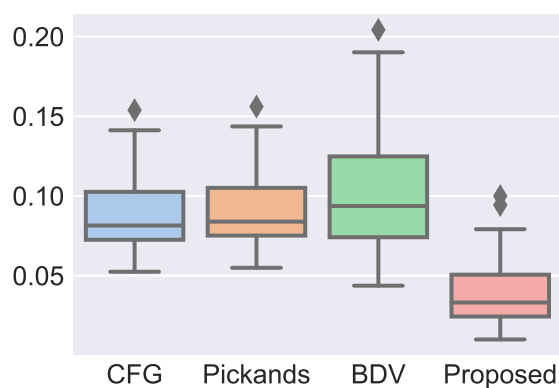

Supplement: supplementary_material [file attachment]

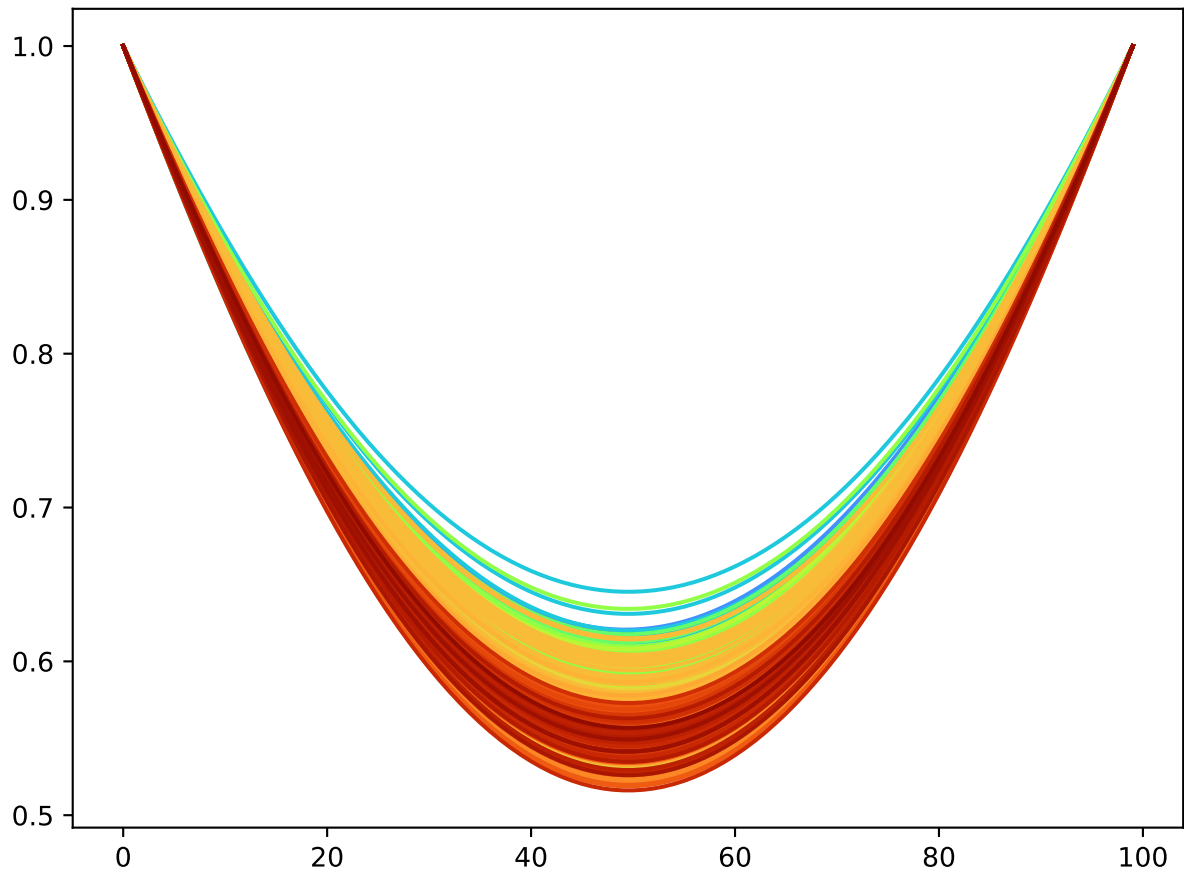

Supplement: supplementary_material [file attachment]

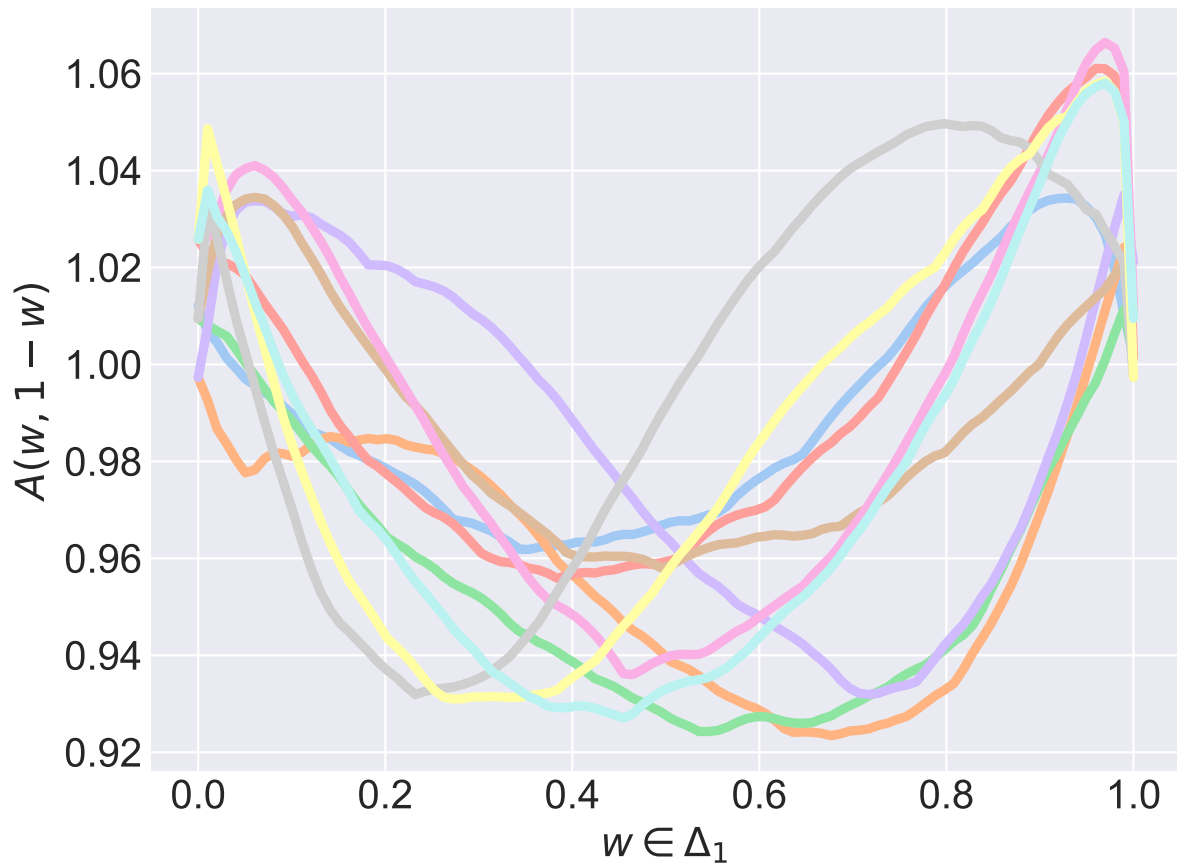

Supplement: supplementary_material [file attachment]

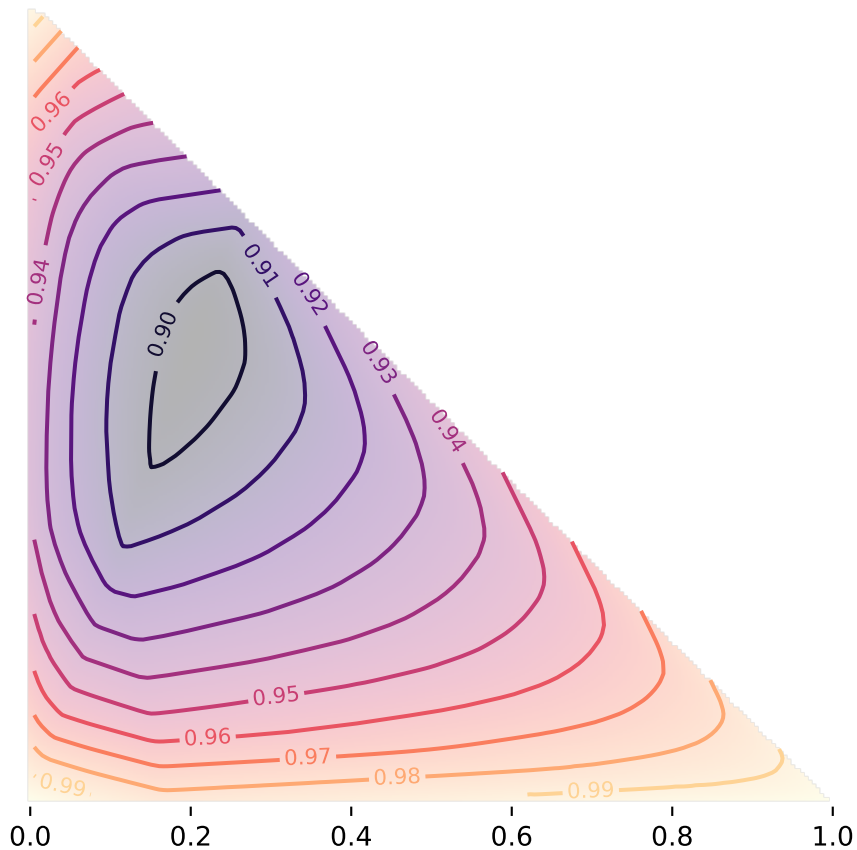

Supplement: supplementary_material [file attachment]

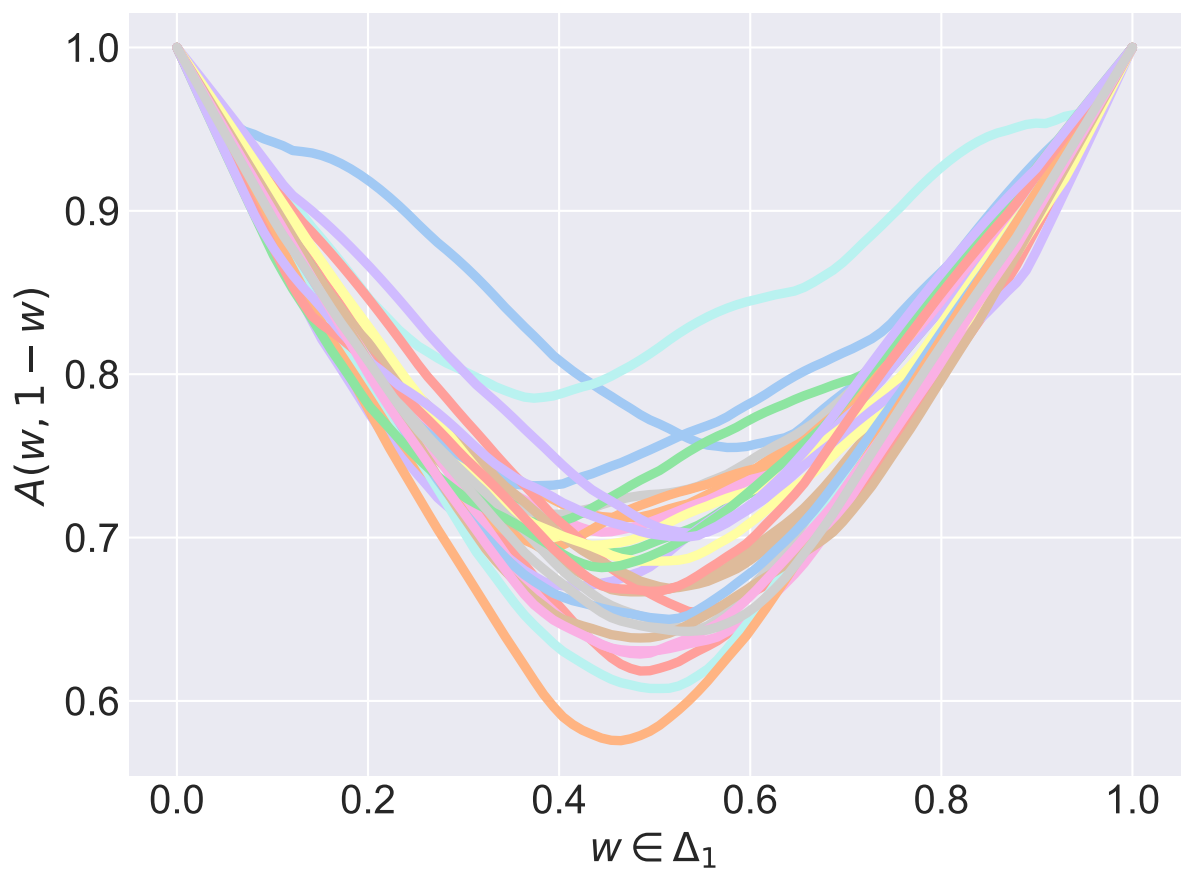

Supplement: supplementary_material [file attachment]

$d = 256$ 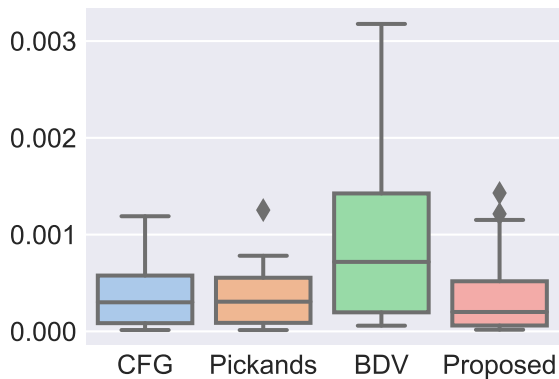 $d = 512$ 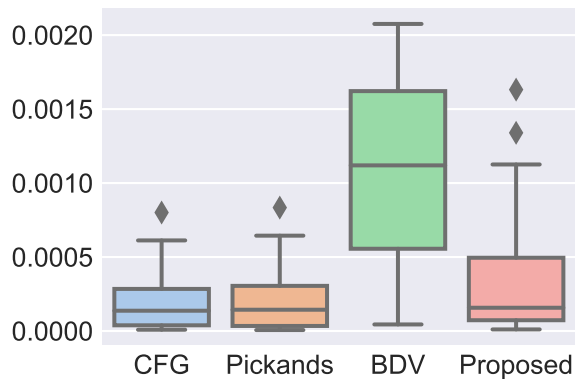 $d = 784$ 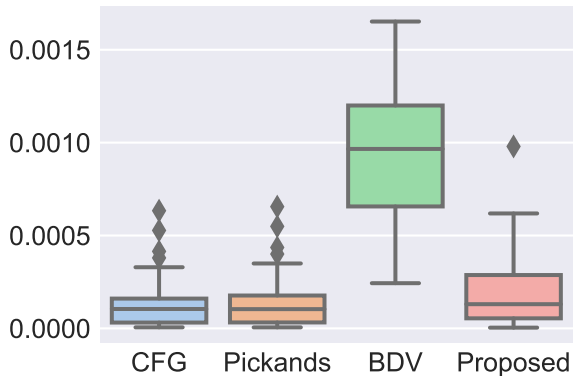 $d = 1024$ 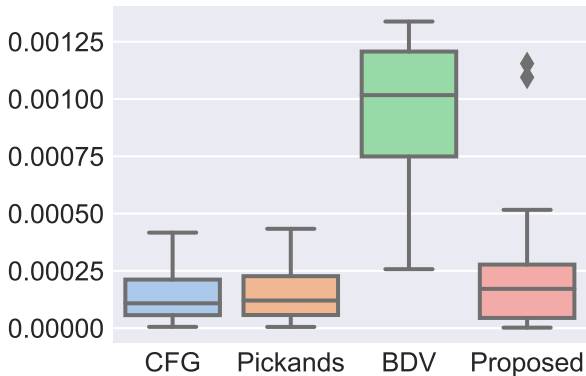

Supplement: supplementary_material [file attachment]

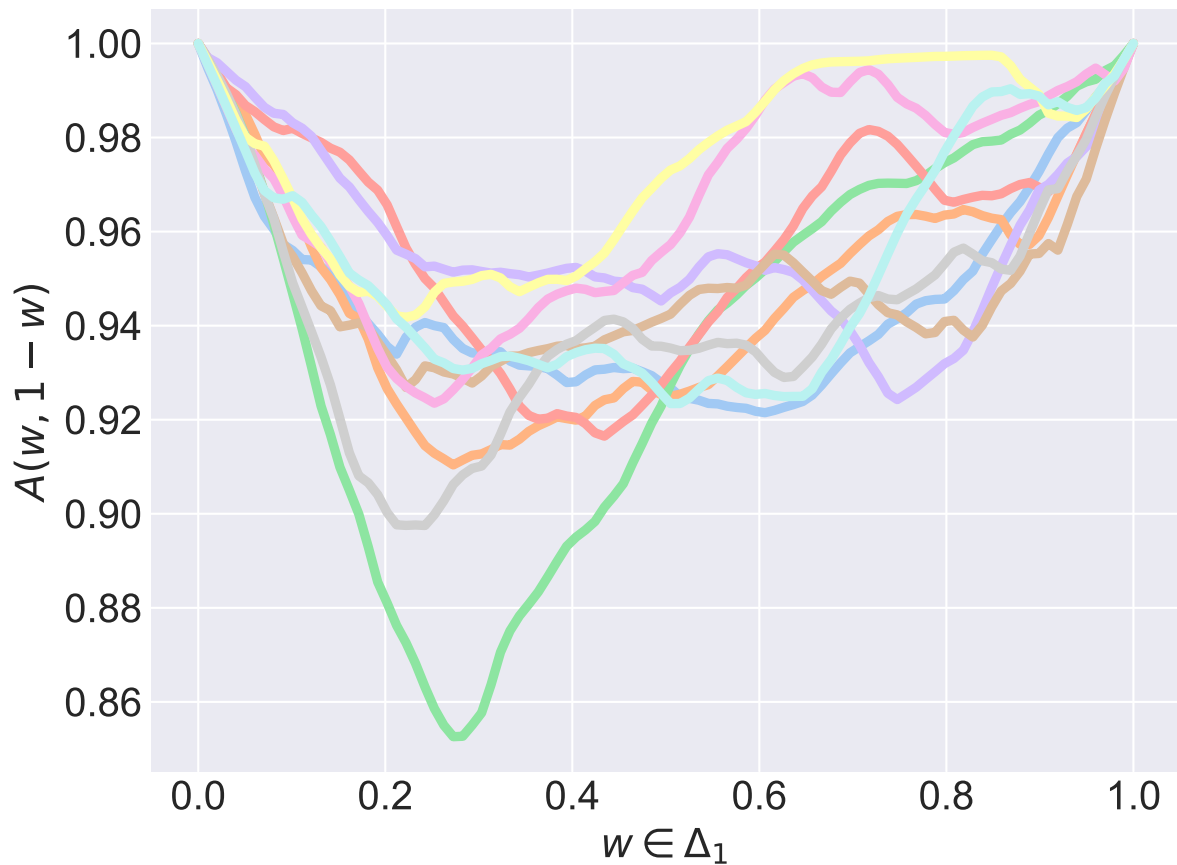

Supplement: supplementary_material [file attachment]

$d = 256$ 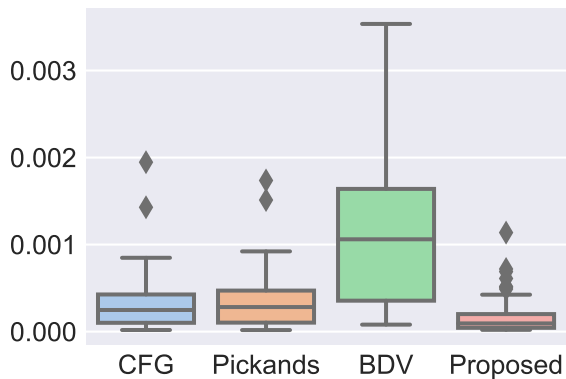 $d = 512$ 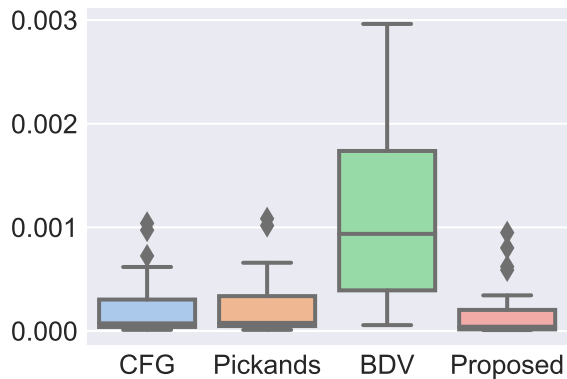 $d = 784$ 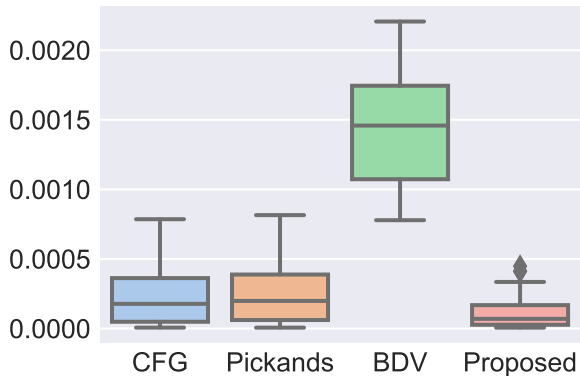 $d = 1024$ 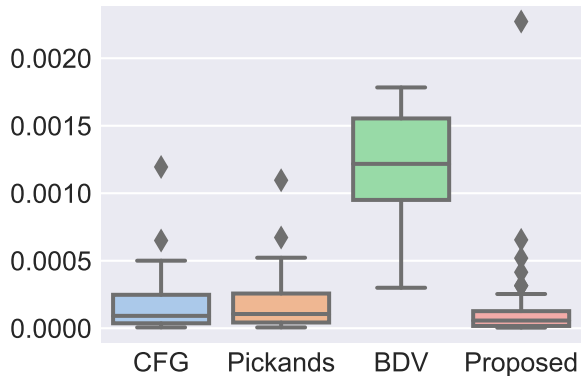

Supplement: supplementary_material [file attachment]

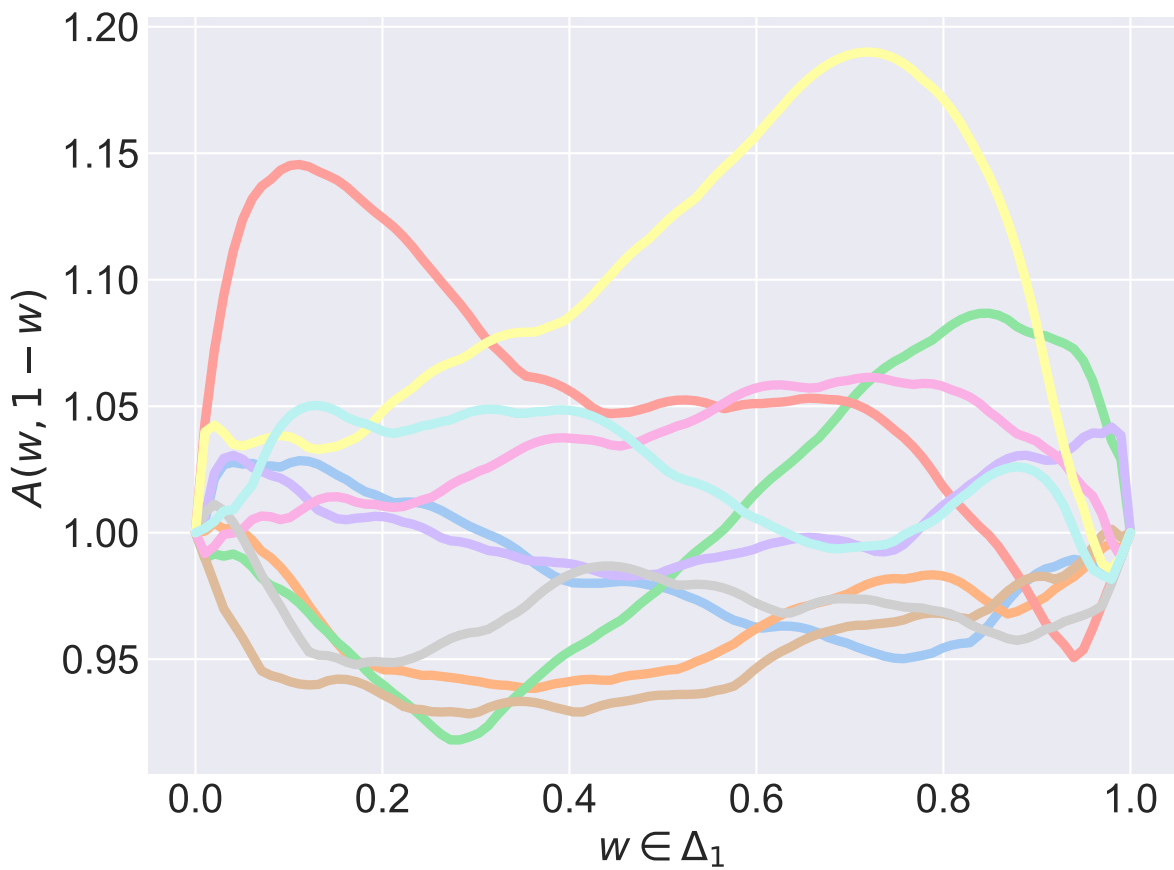

Supplement: supplementary_material [file attachment]

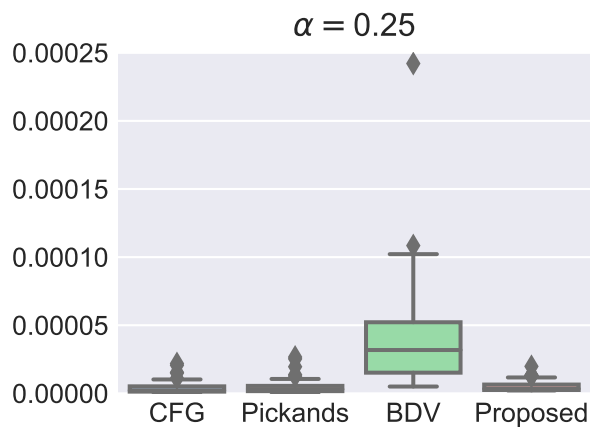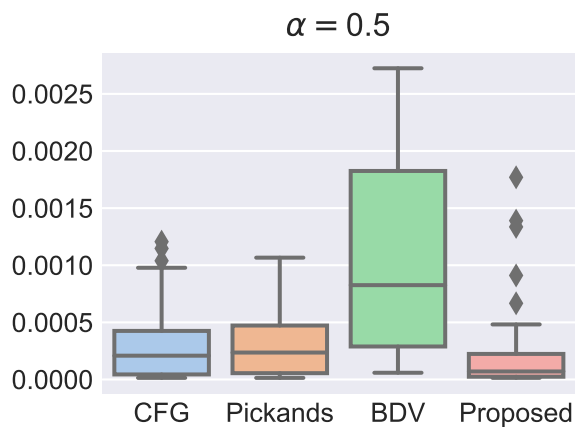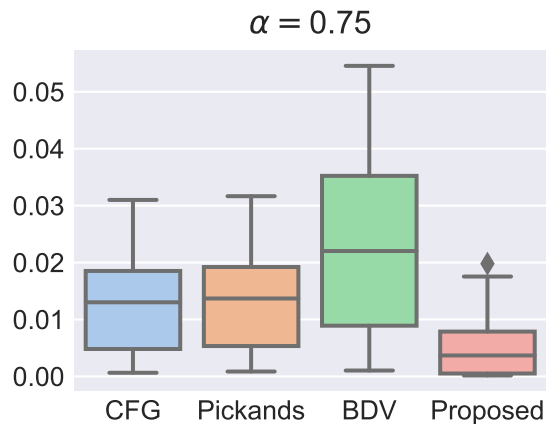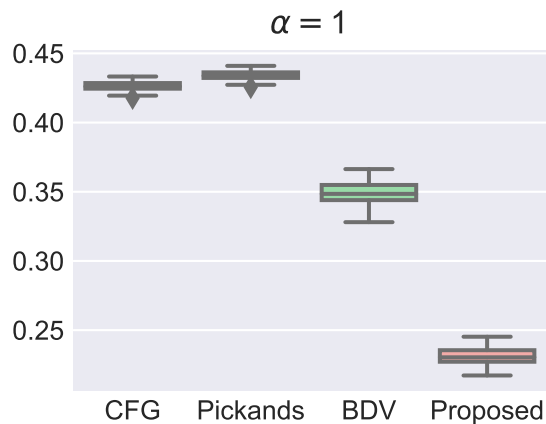

Supplement: supplementary_material [file attachment]

$\alpha = 0.25$

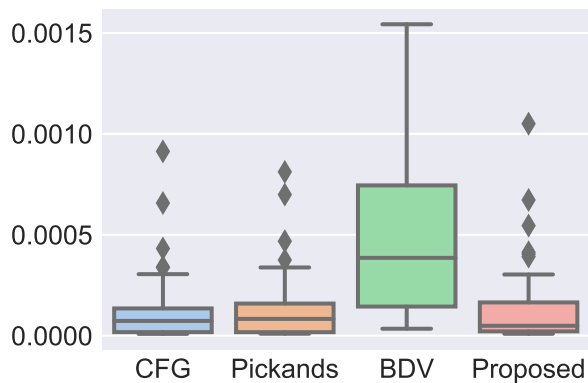

$\alpha = 0.5$

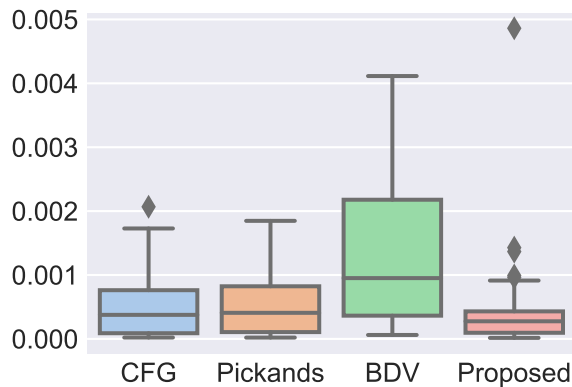

$\alpha = 0.75$

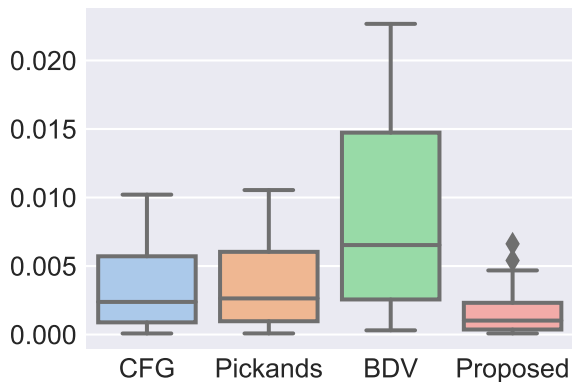

$\alpha = 1$

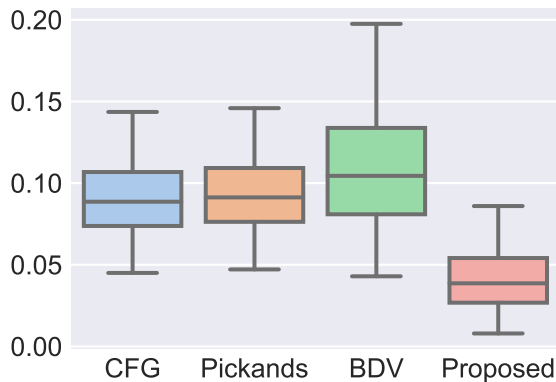

Supplement: supplementary_material [file attachment]

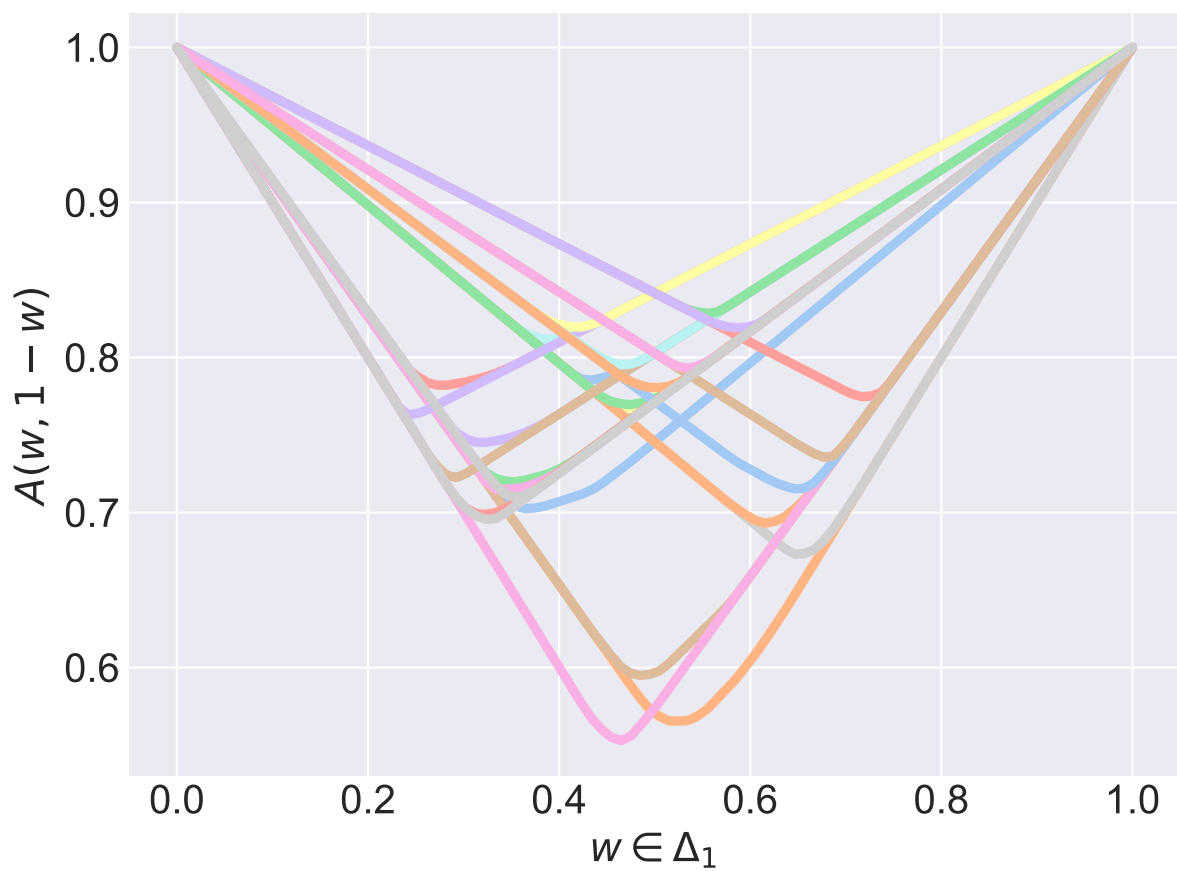

Supplement: supplementary_material [file attachment]

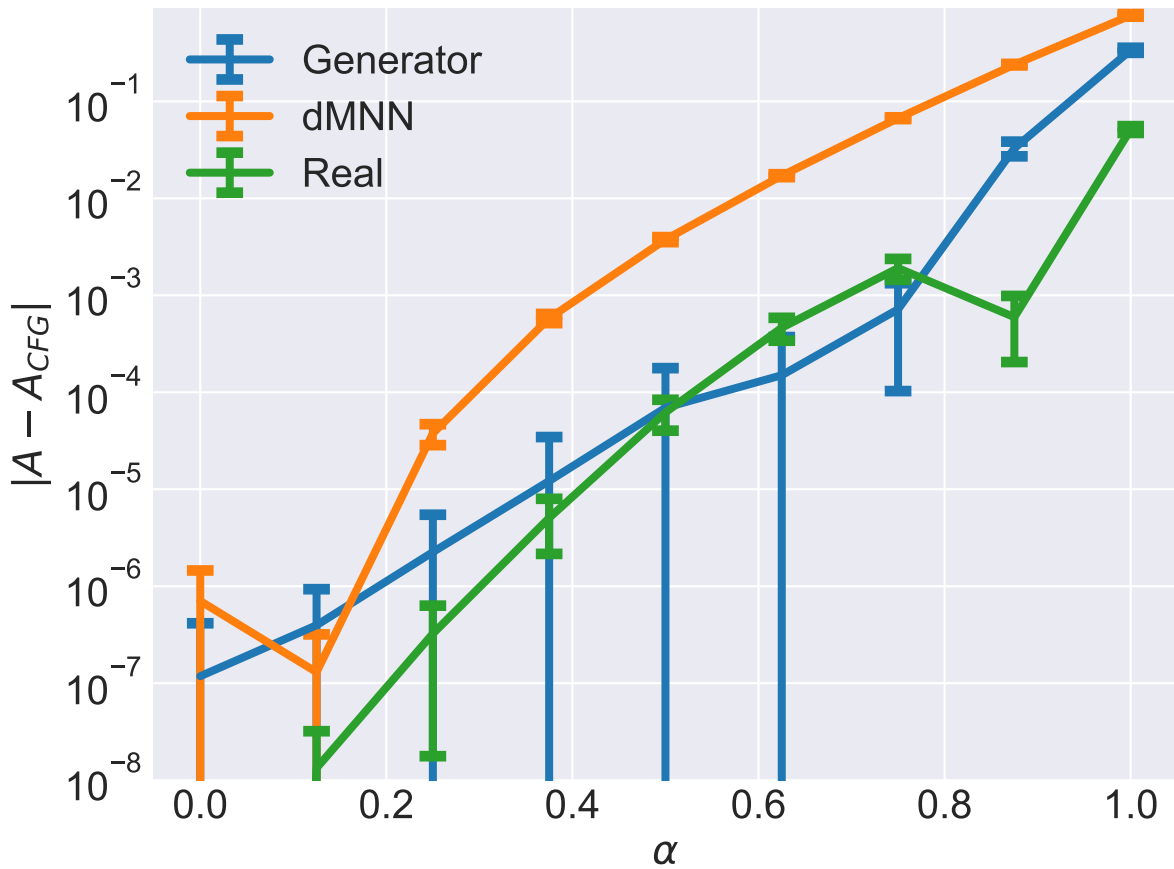

Supplement: supplementary_material [file attachment]

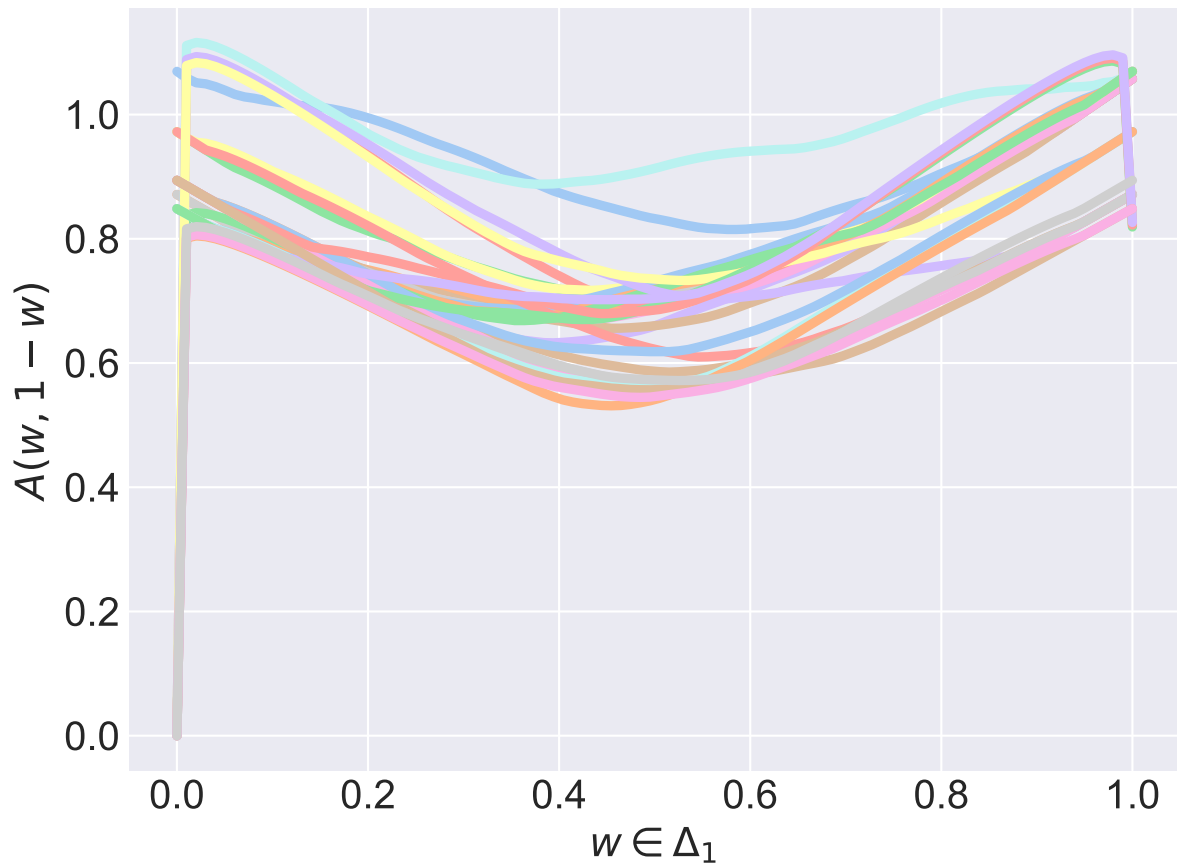

Supplement: supplementary_material [file attachment]

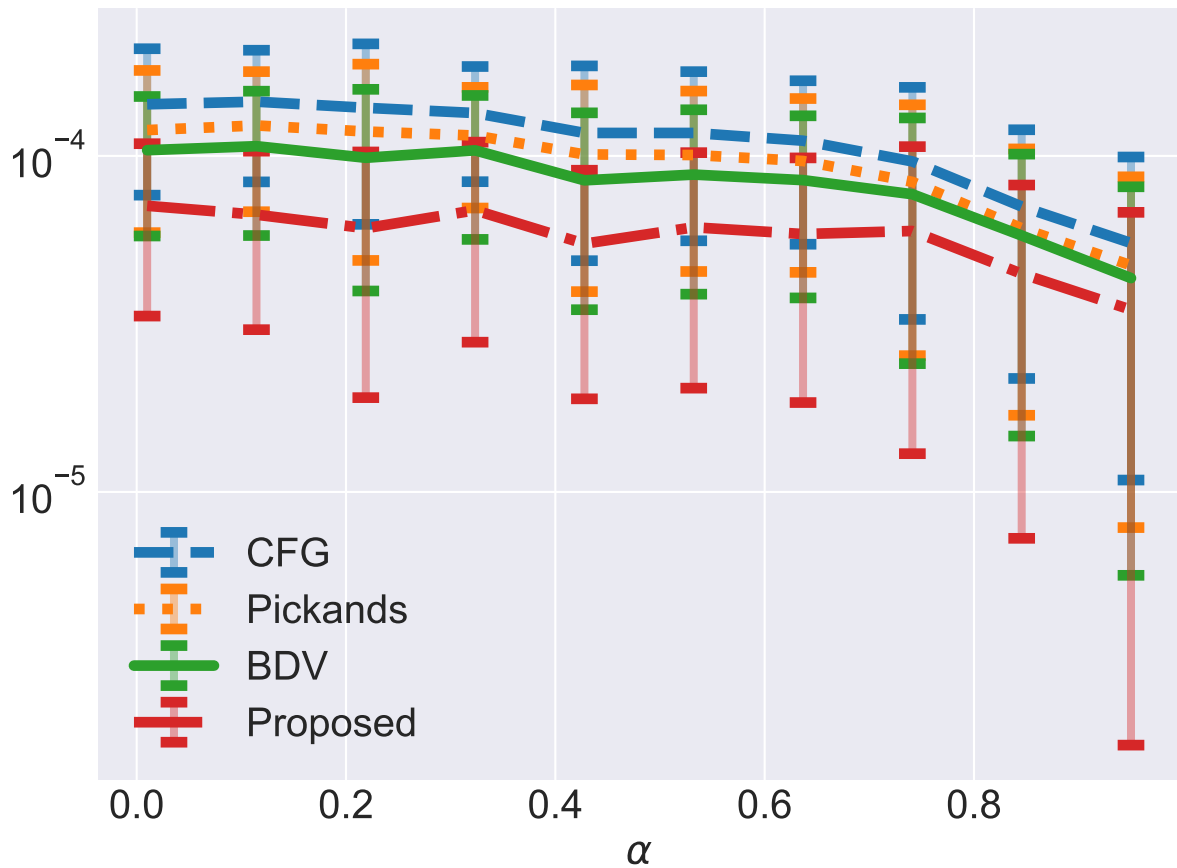

Supplement: supplementary_material [file attachment]

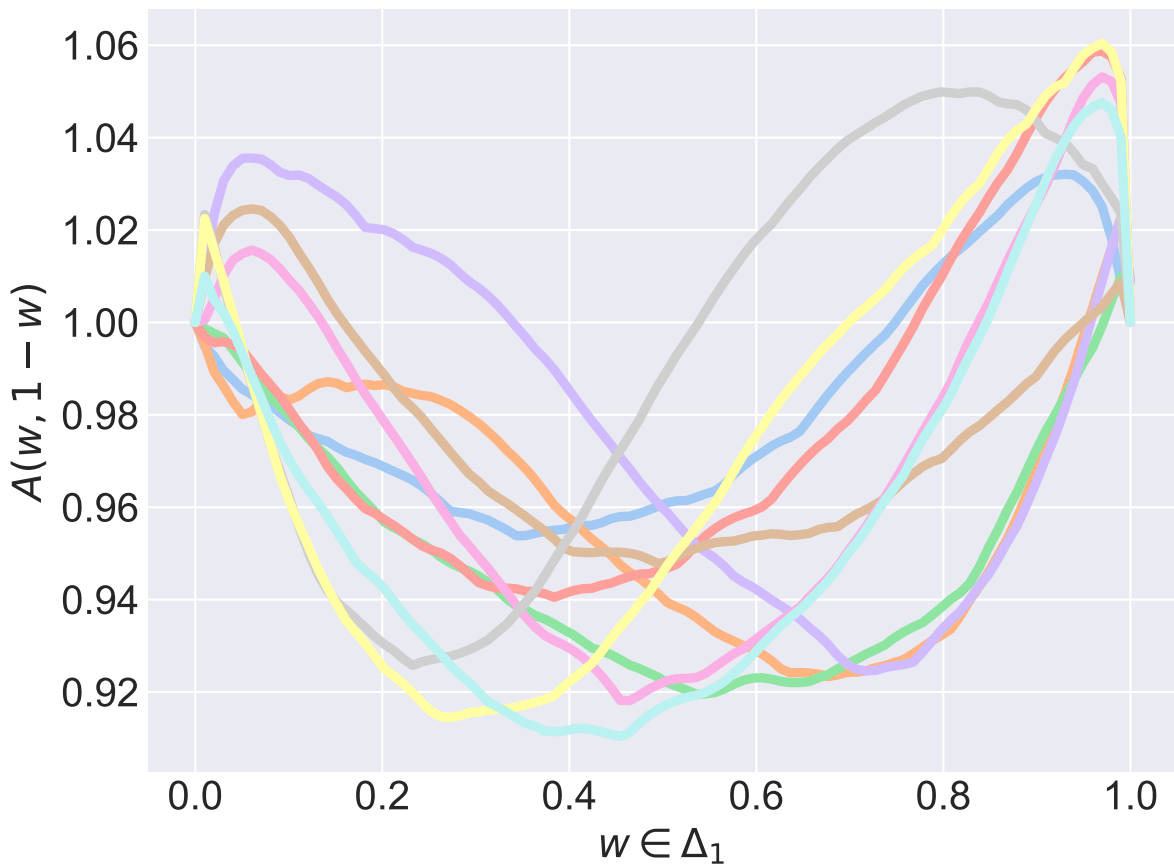

Supplement: supplementary_material [file attachment]

$\alpha = 0.25$

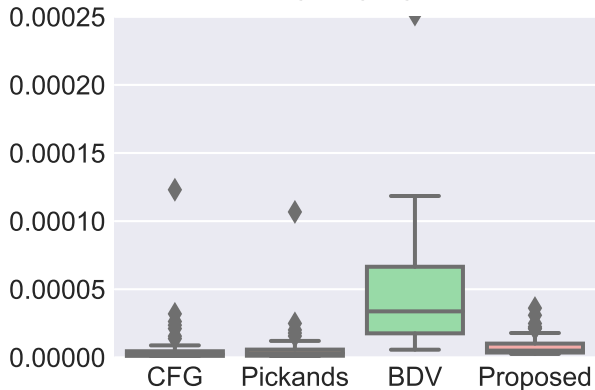

$\alpha = 0.5$

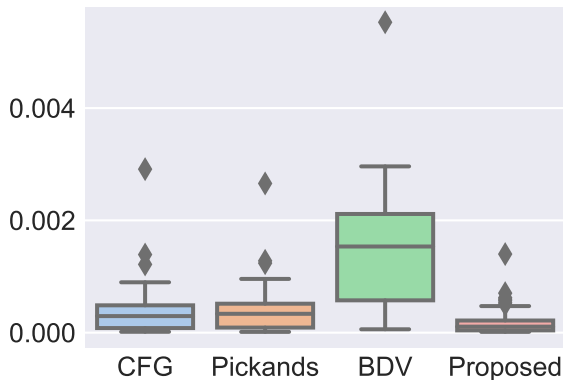

$\alpha = 0.75$

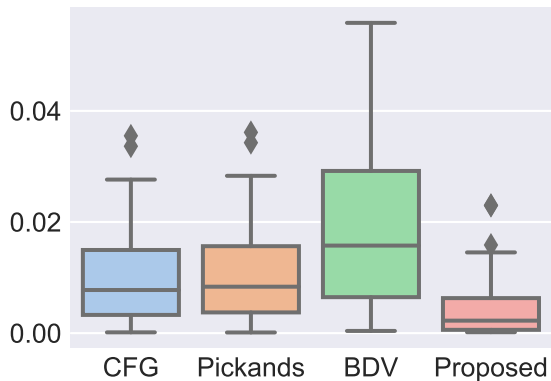

$\alpha = 1$

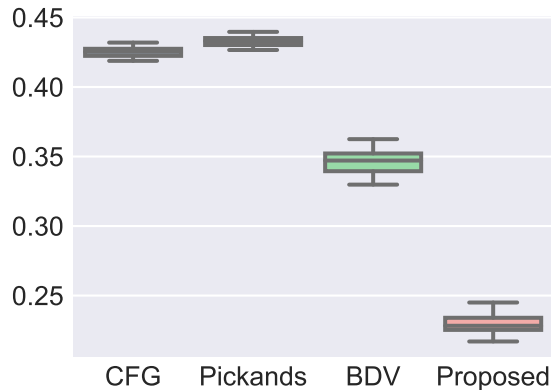

Supplement: supplementary_material [file attachment]

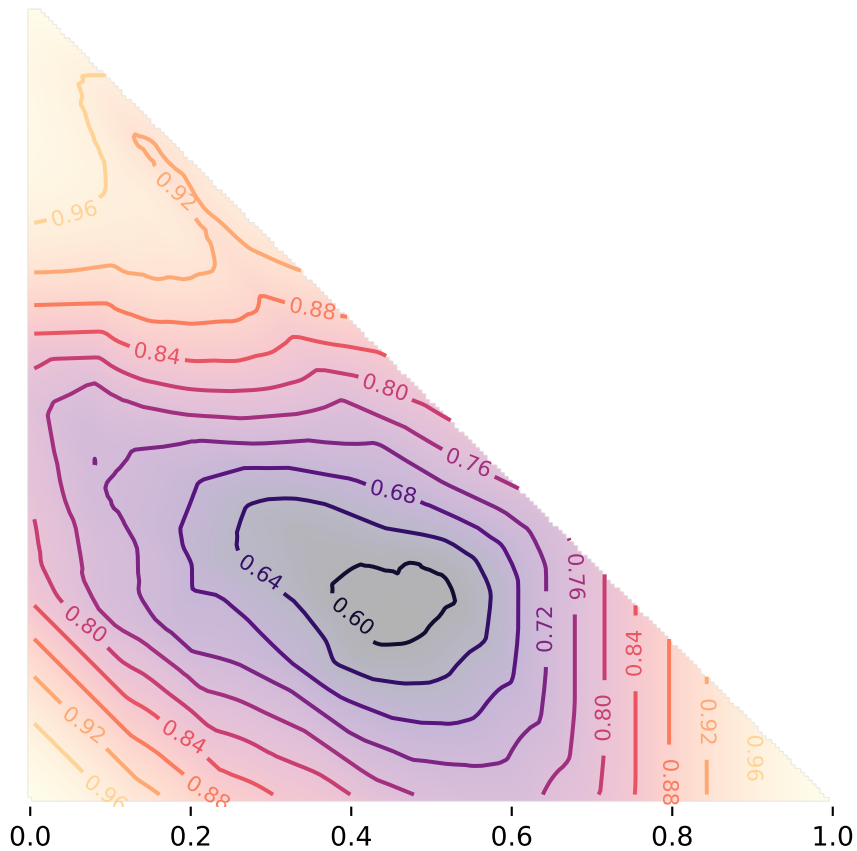

Supplement: supplementary_material [file attachment]

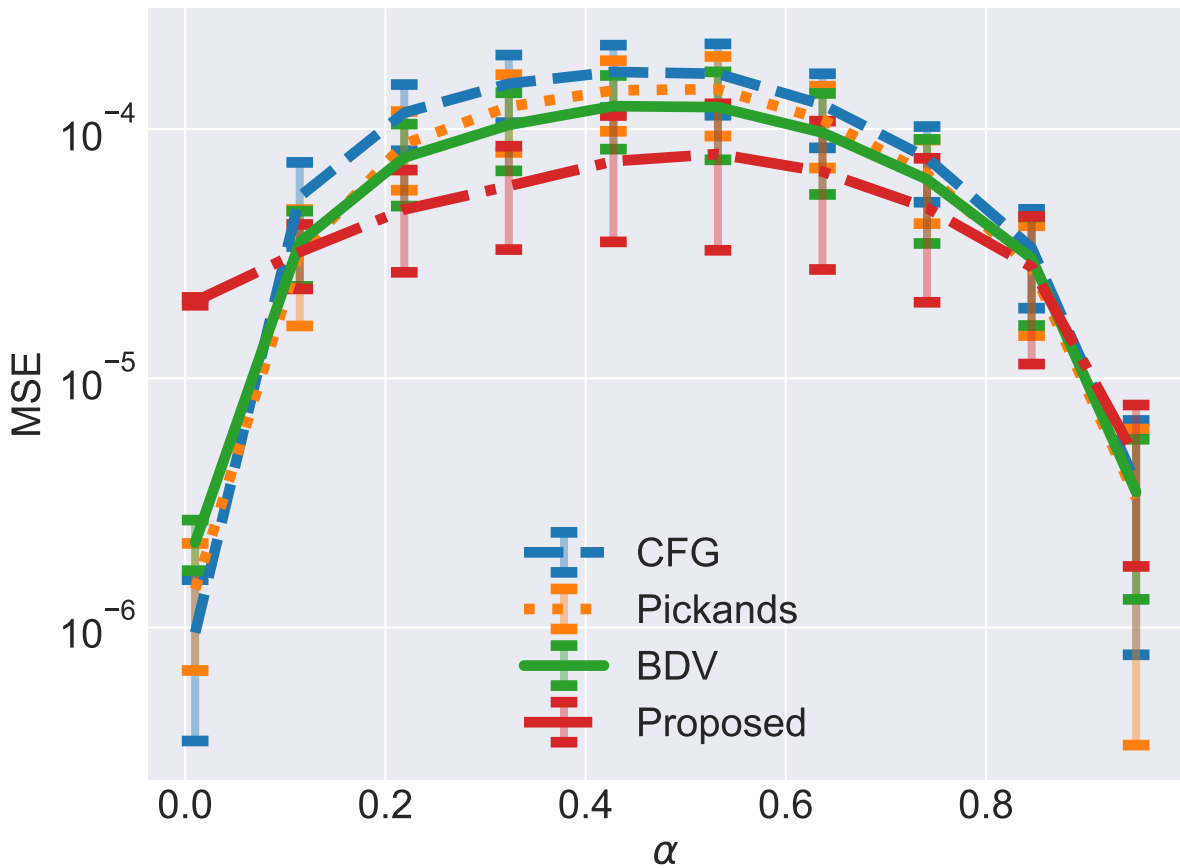

Supplement: supplementary_material [file attachment]

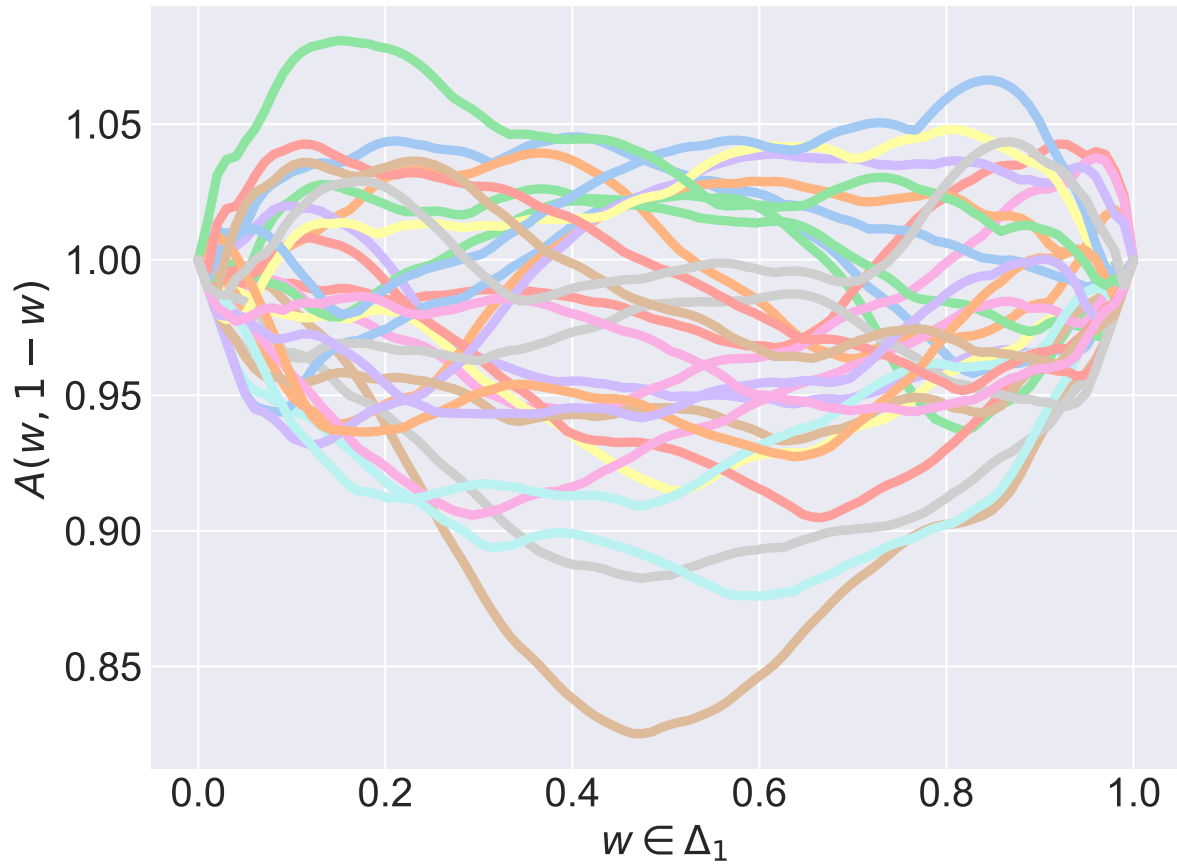

Supplement: supplementary_material [file attachment]

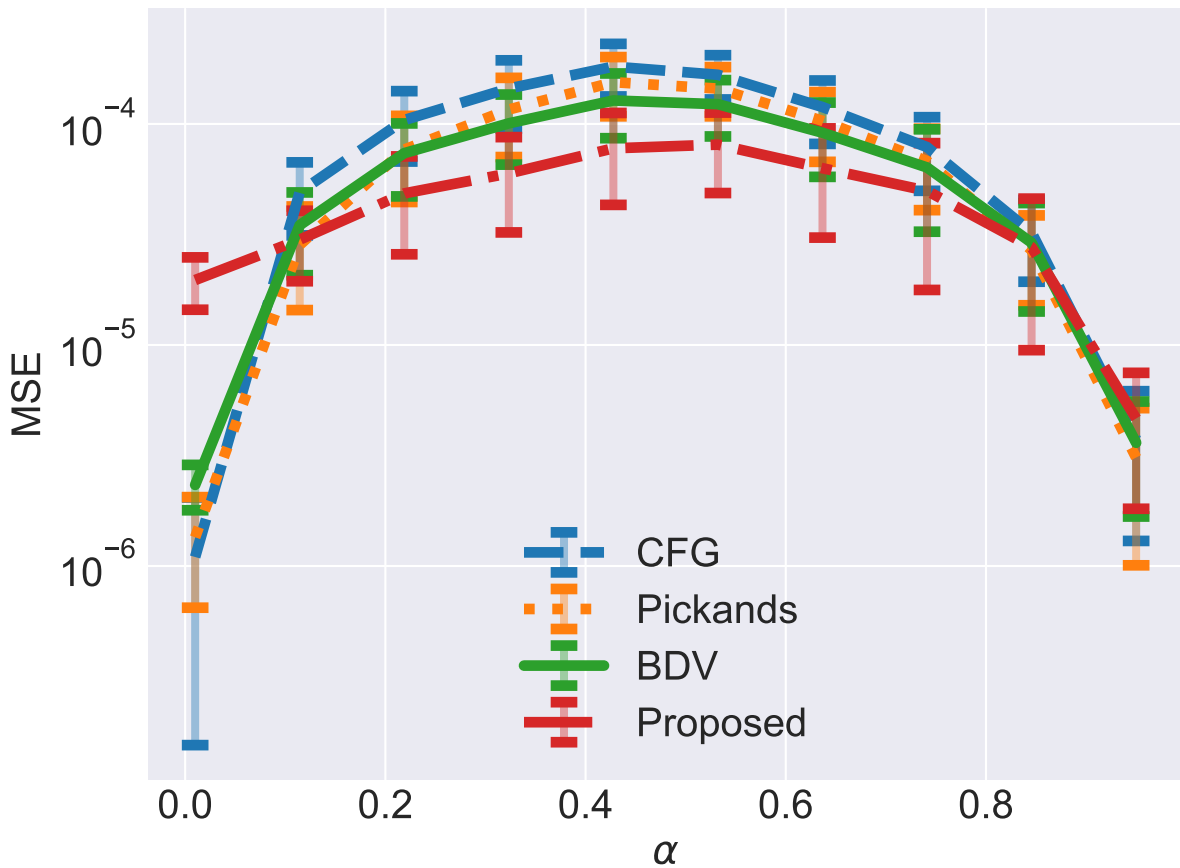

Supplement: supplementary_material [file attachment]

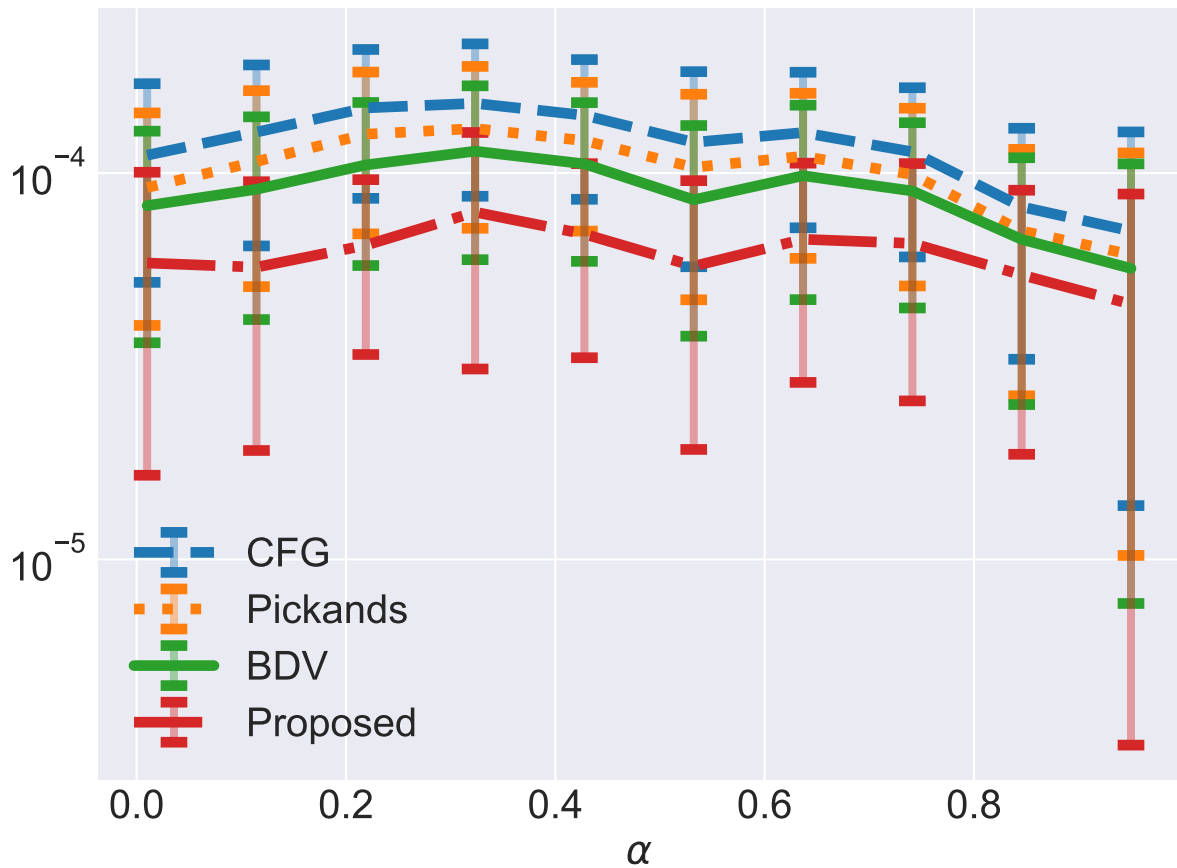

Supplement: supplementary_material [file attachment]

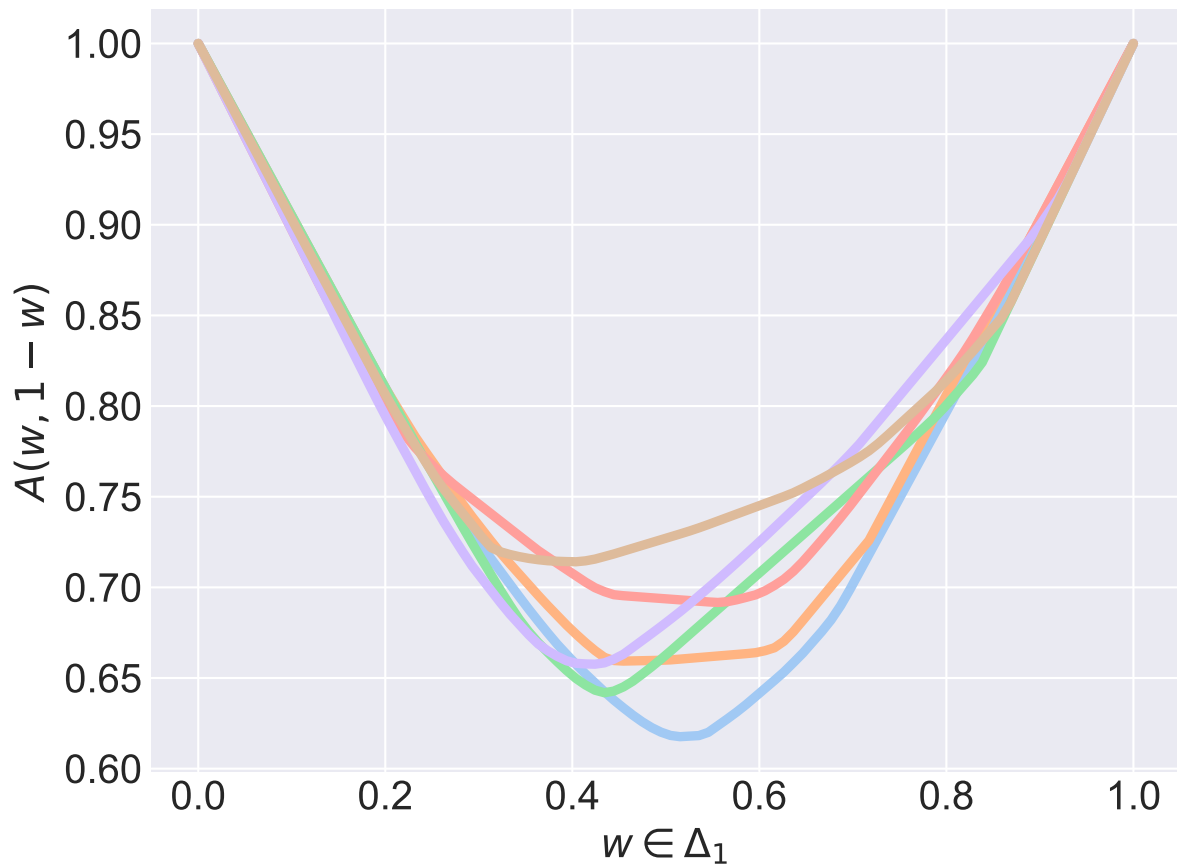

Supplement: supplementary_material [file attachment]

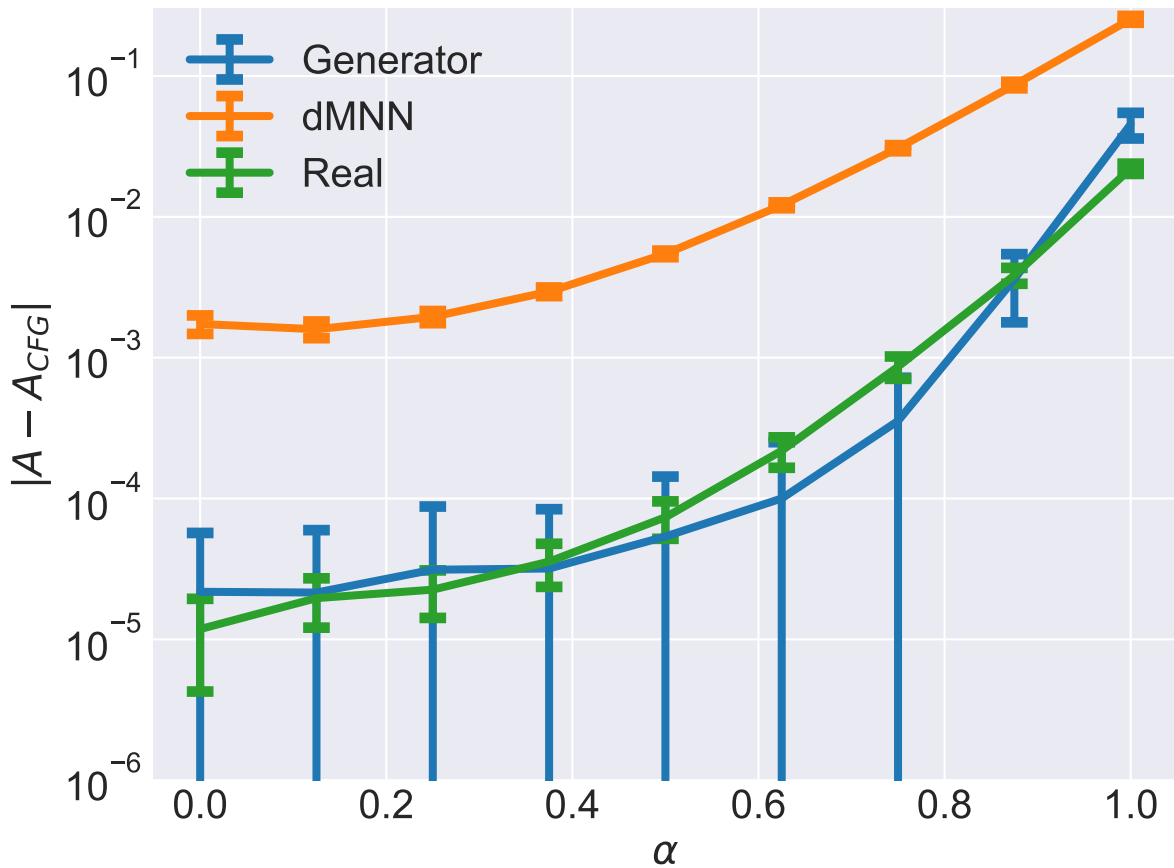

Supplement: supplementary_material [file attachment]

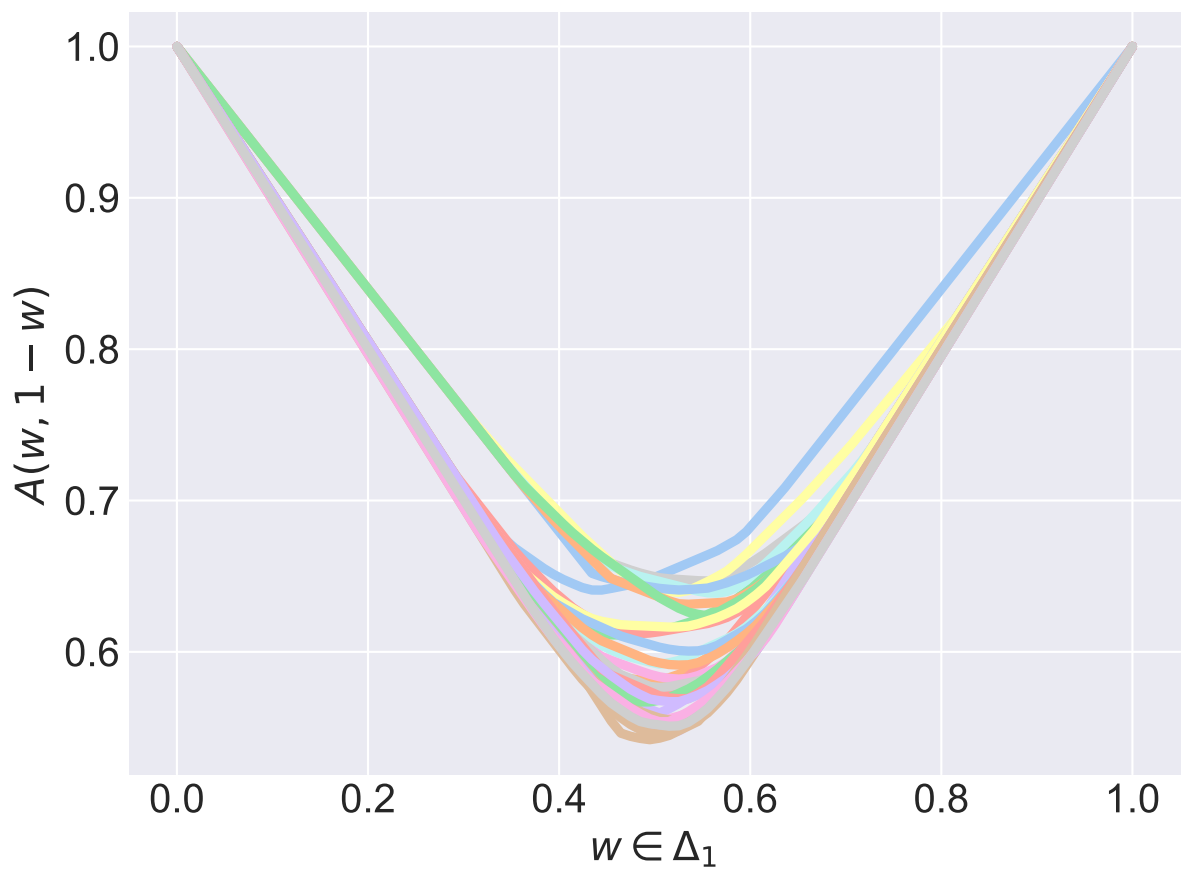

Supplement: supplementary_material [file attachment]

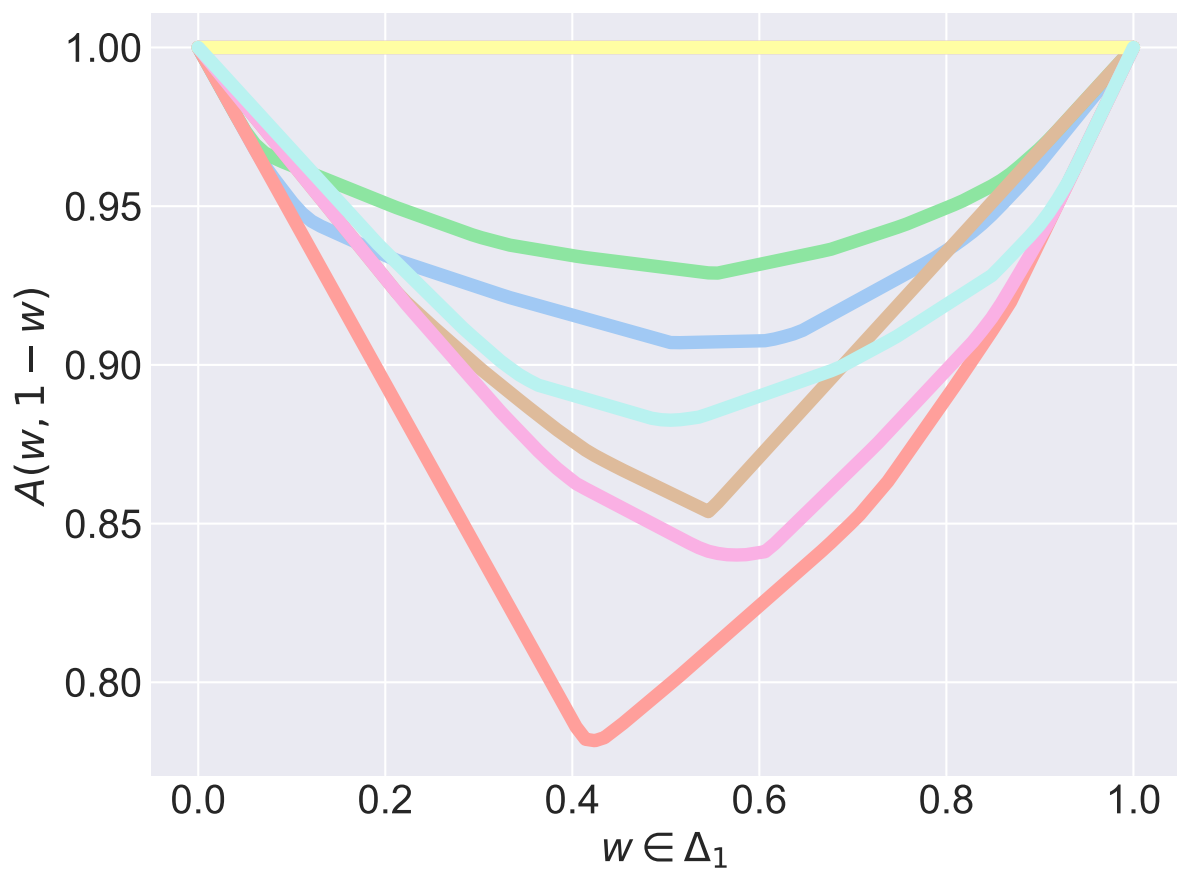

Supplement: supplementary_material [file attachment]

$d = 256$ 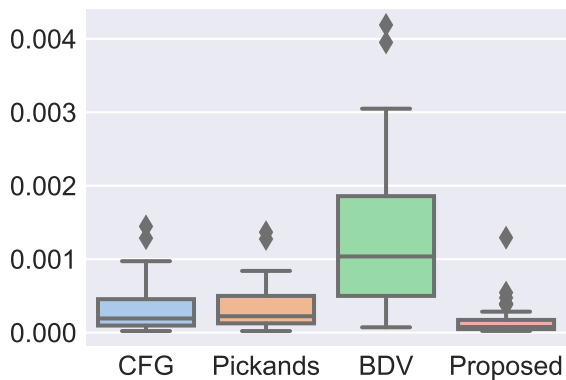 $d = 512$ 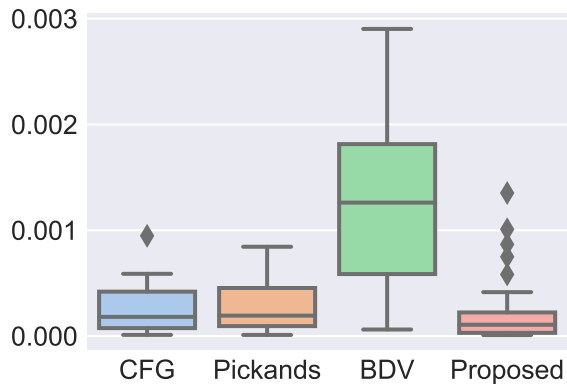 $d = 784$ 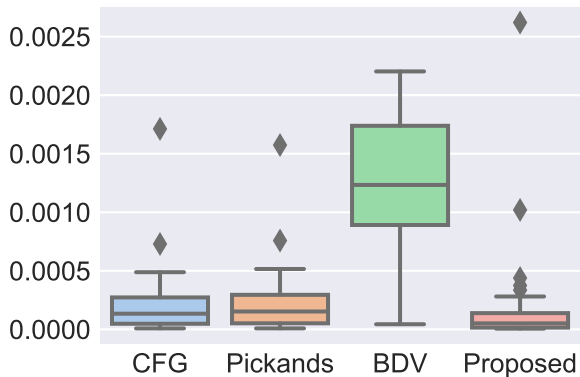 $d = 1024$ 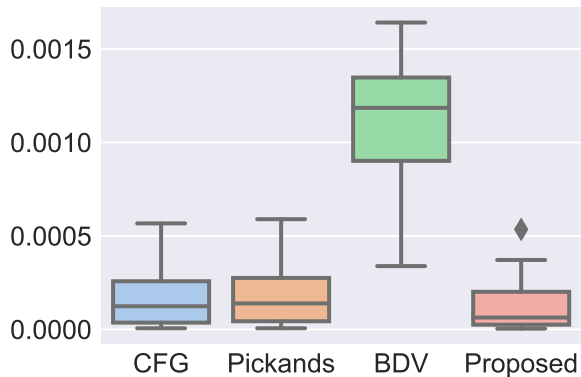

Supplement: supplementary_material [file attachment]

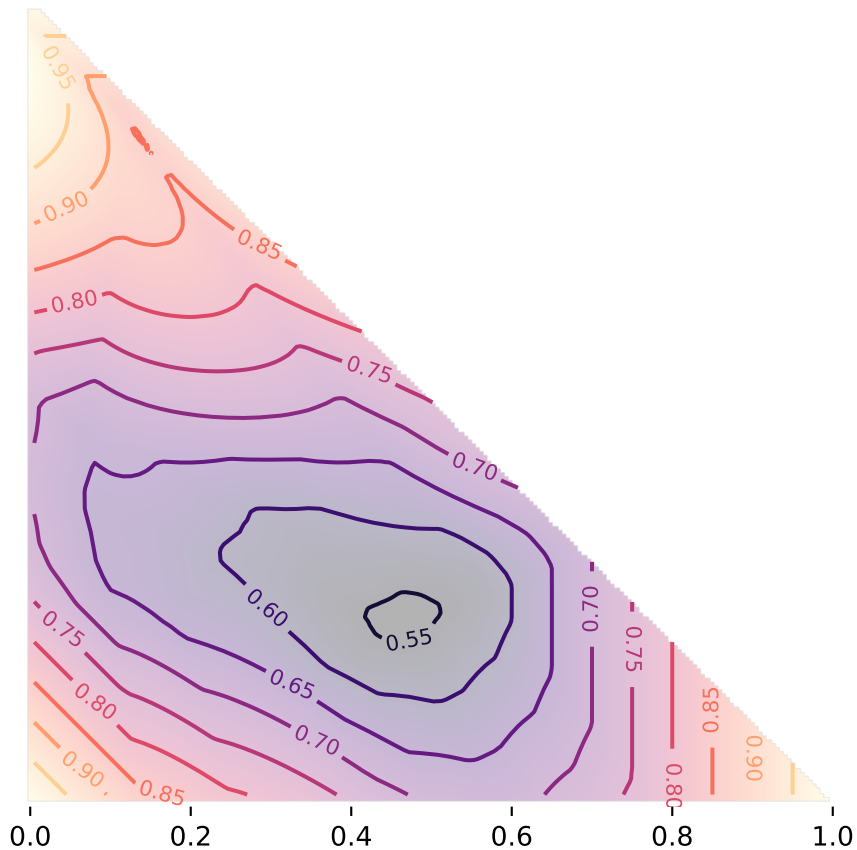

Supplement: supplementary_material [file attachment]

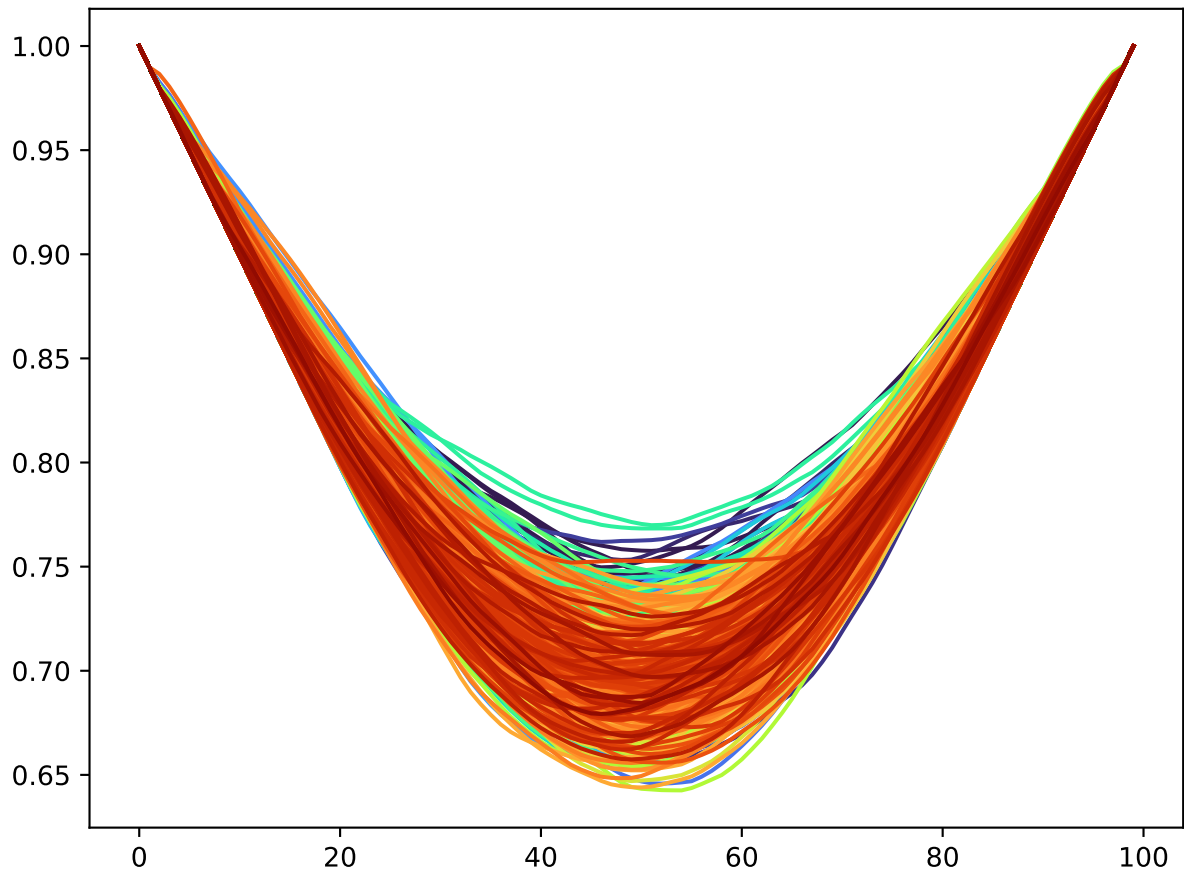

Supplement: supplementary_material [file attachment]

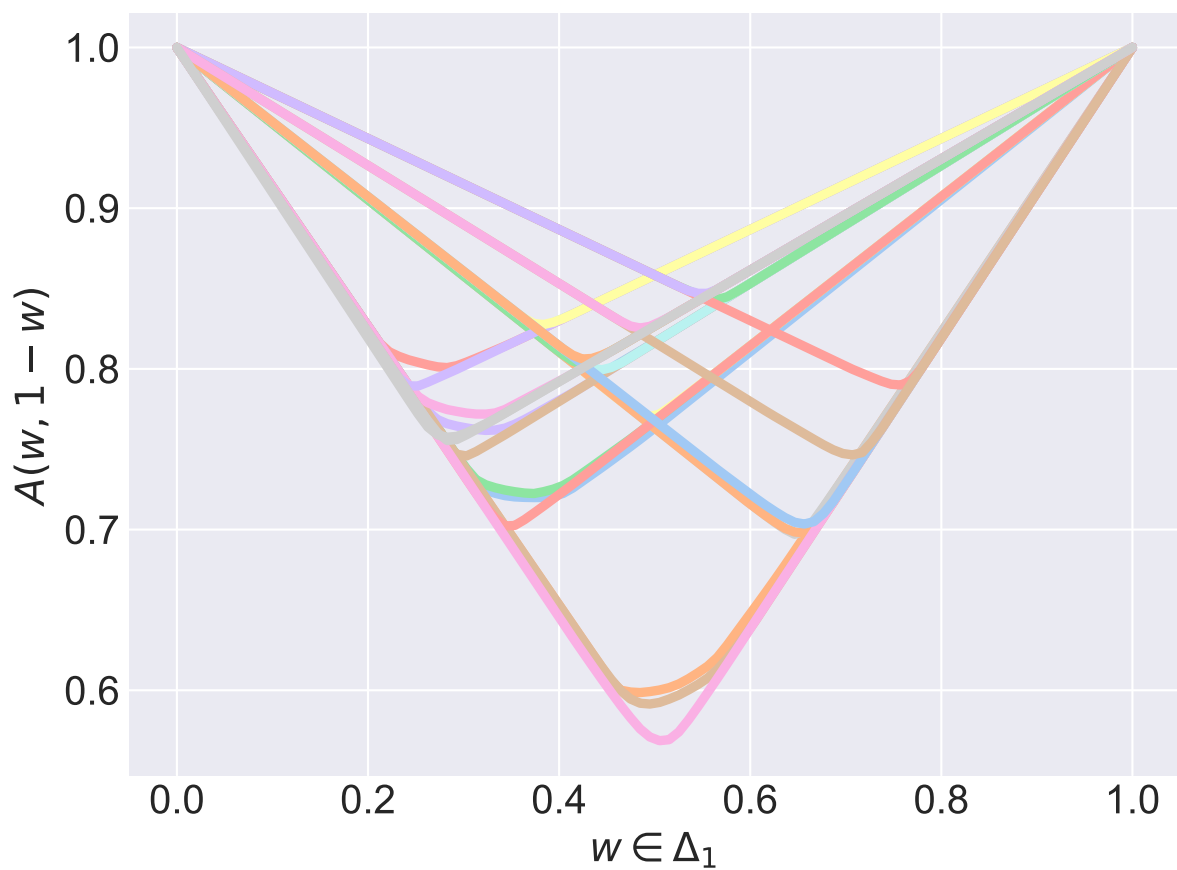

Supplement: supplementary_material [file attachment]

$d = 256$ 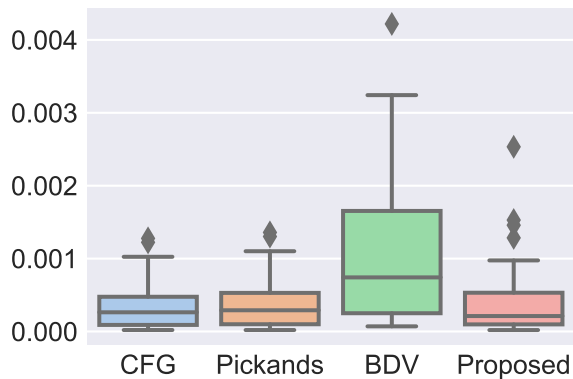 $d = 512$ 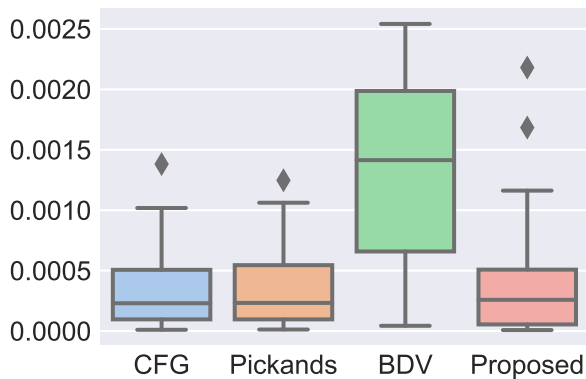 $d = 784$ 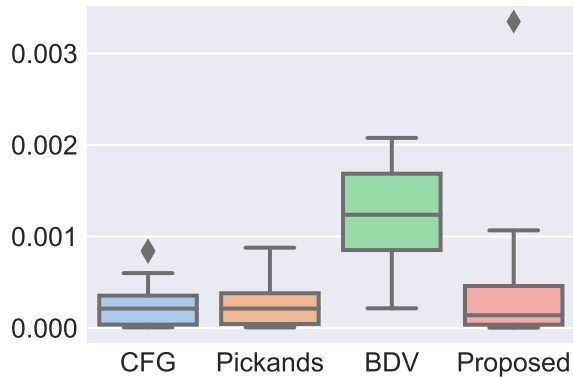 $d = 1024$ 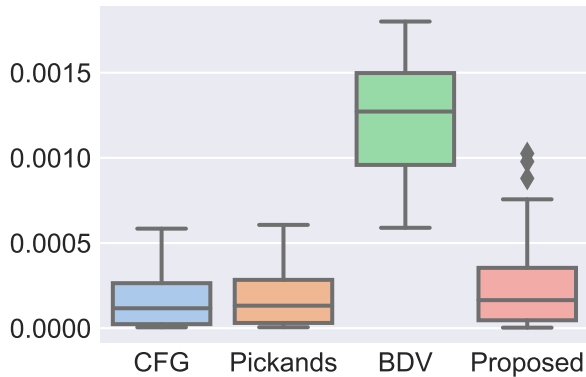

Supplement: supplementary_material [file attachment]

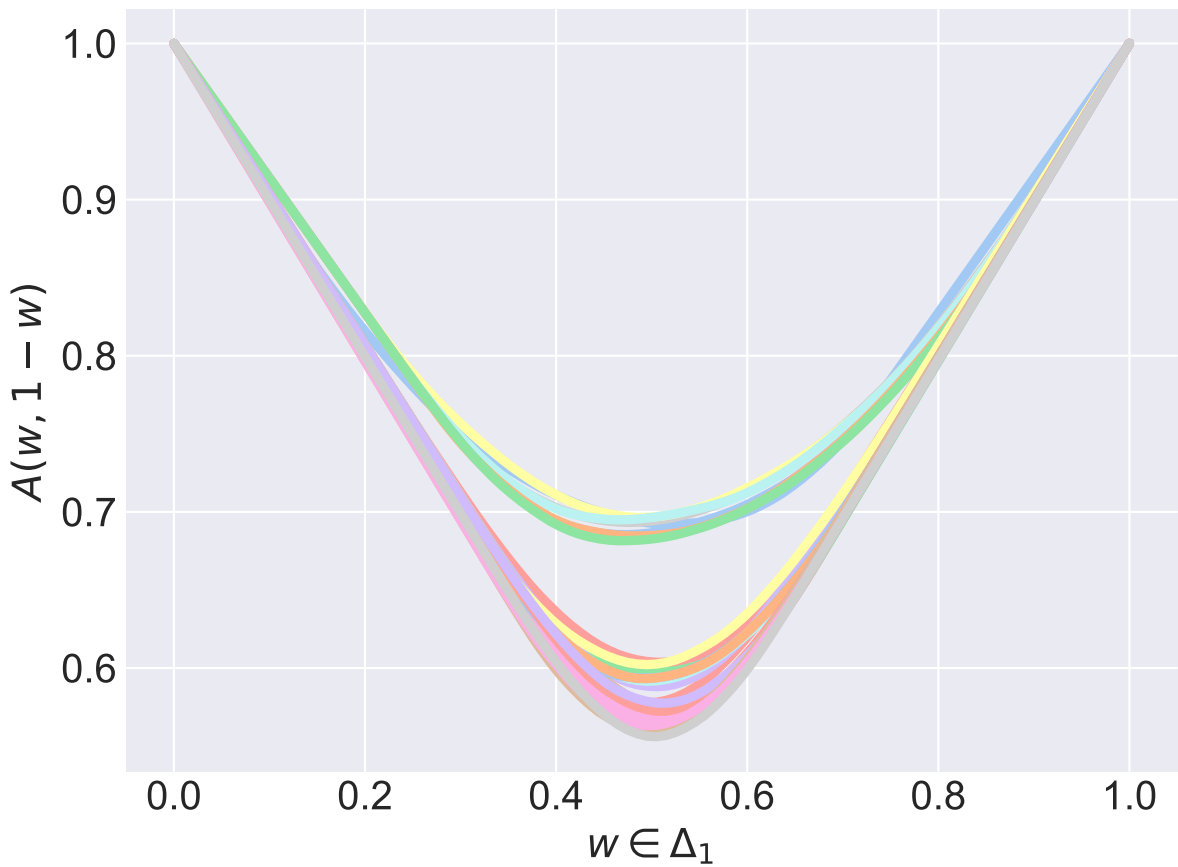

Supplement: supplementary_material [file attachment]

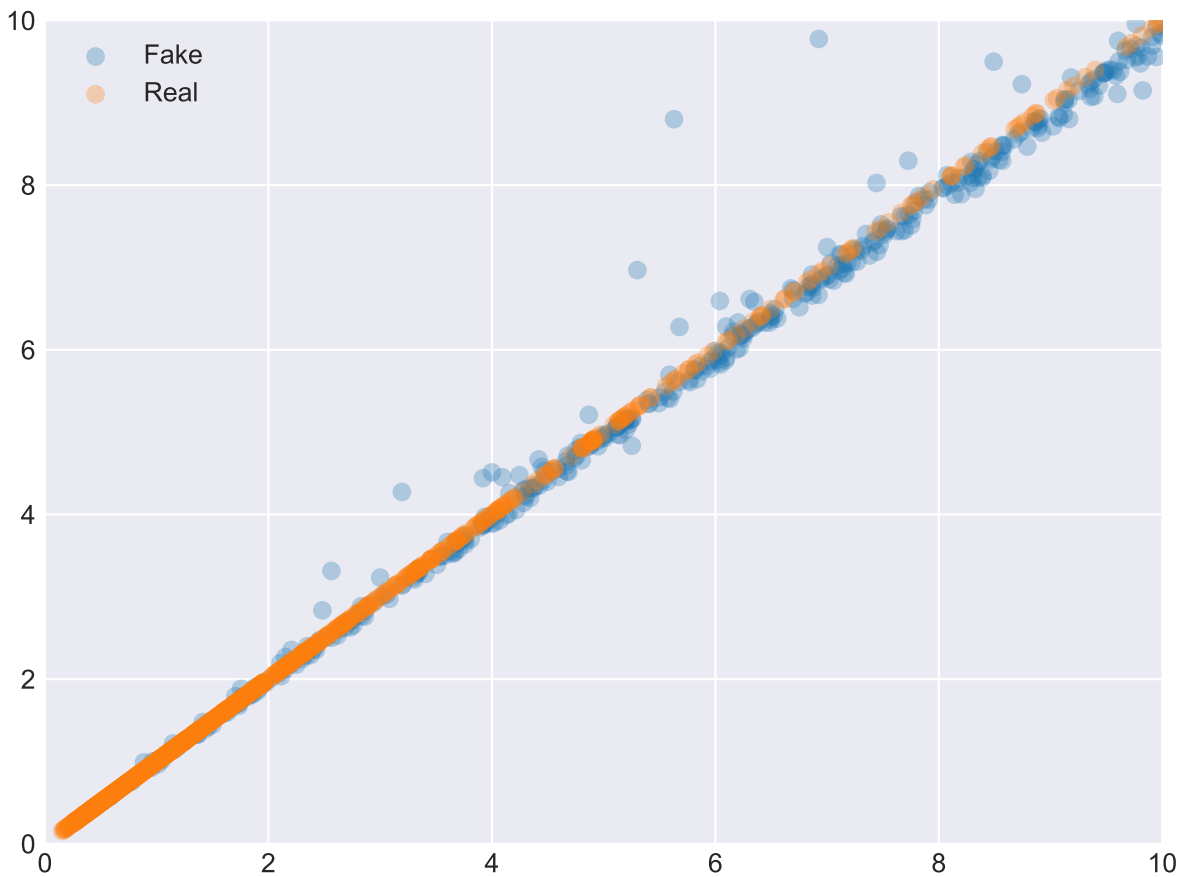

Supplement: supplementary_material [file attachment]

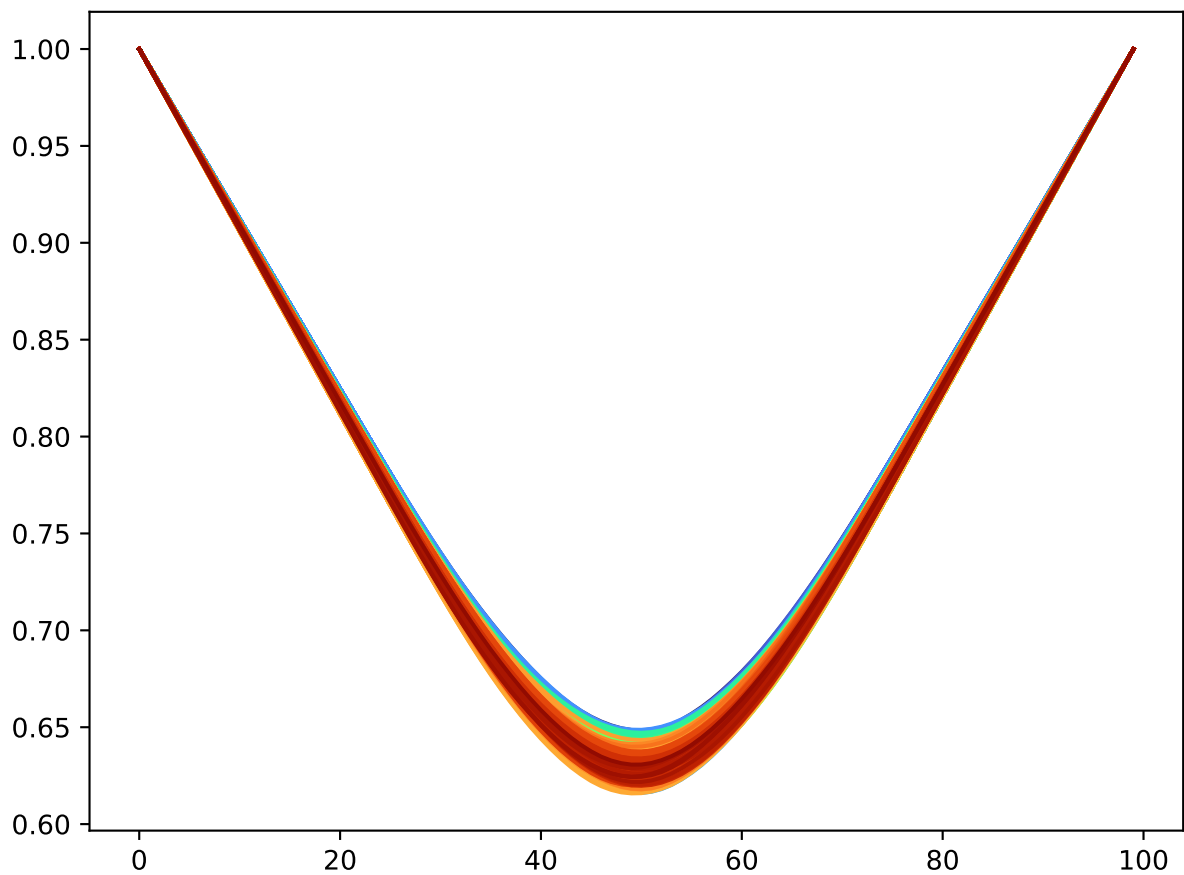

Supplement: supplementary_material [file attachment]

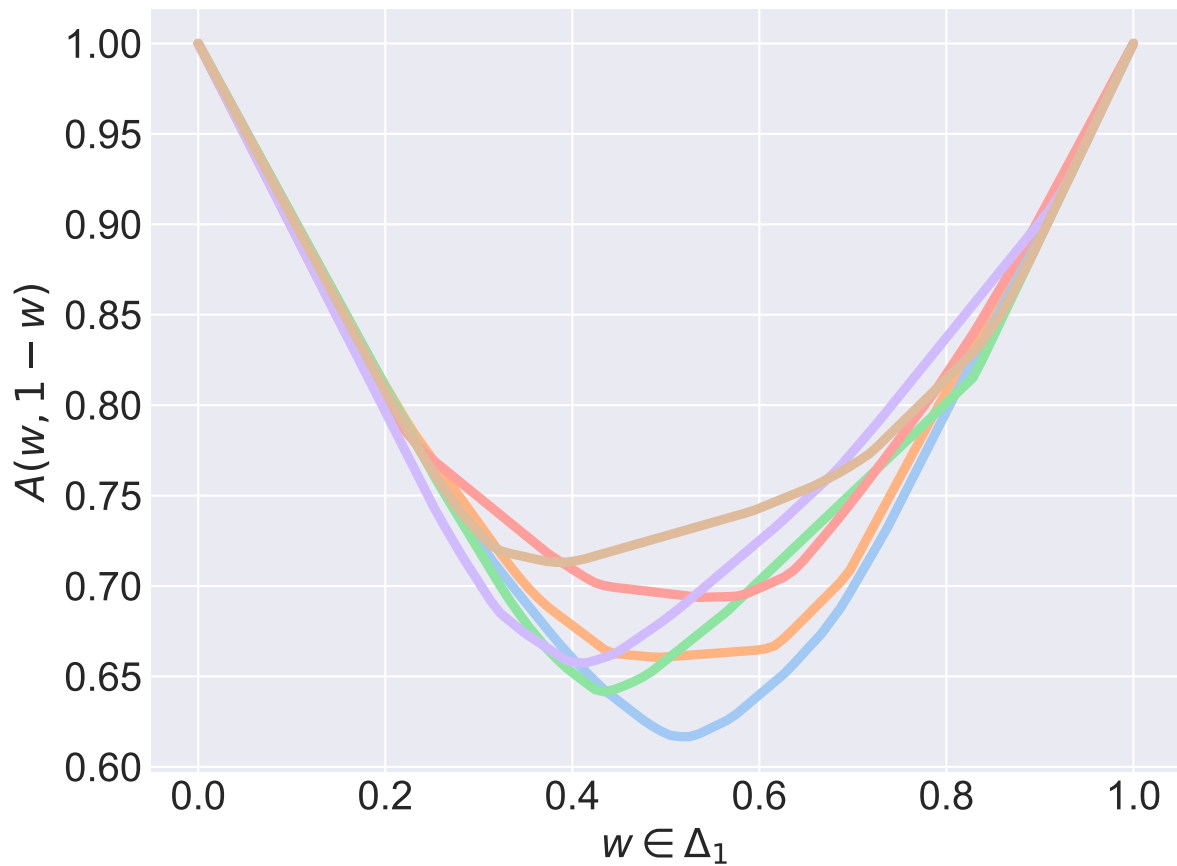

Supplement: supplementary_material [file attachment]

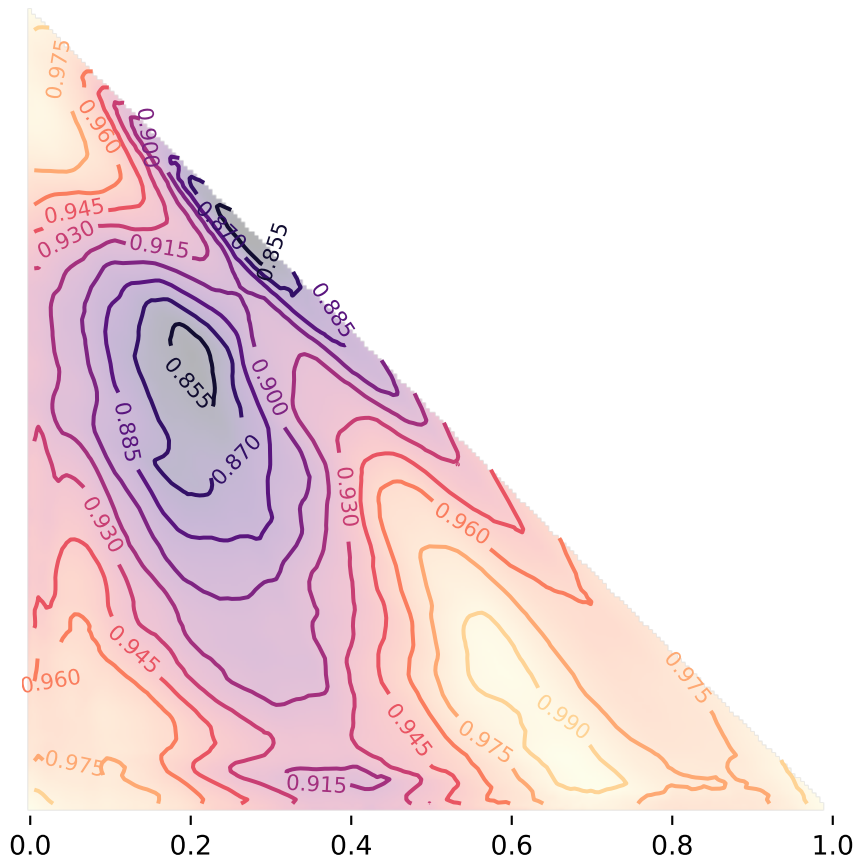

Supplement: supplementary_material [file attachment]

$\alpha = 0.25$

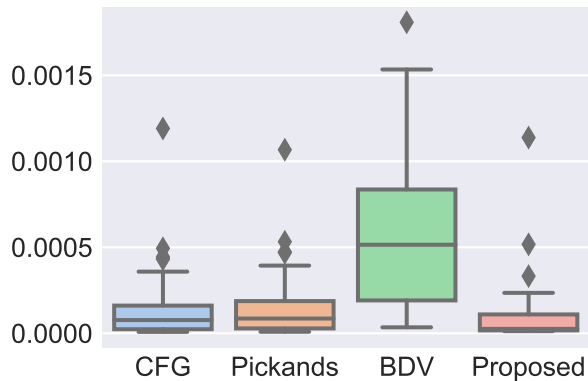

$\alpha = 0.5$

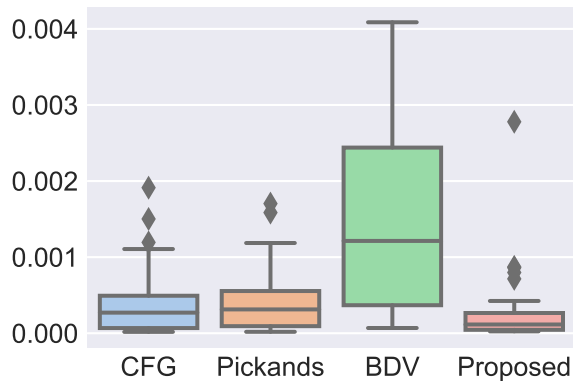

$\alpha = 0.75$

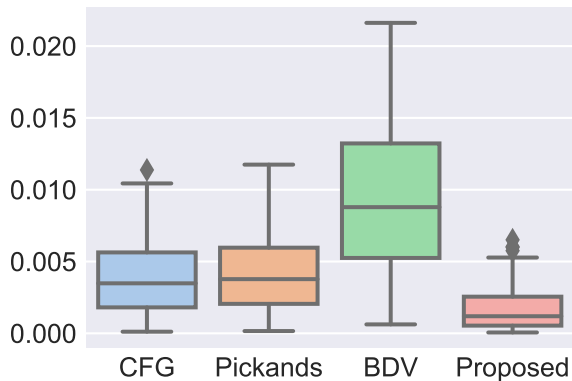

$\alpha = 1$

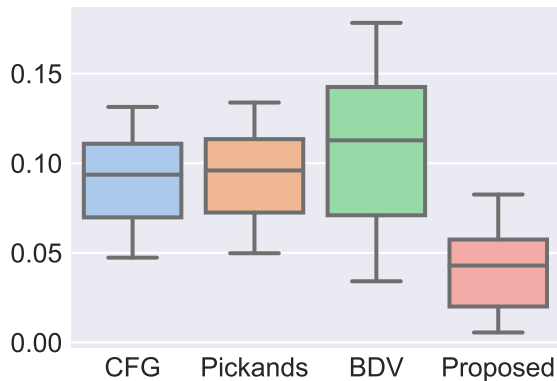

Supplement: supplementary_material [file attachment]

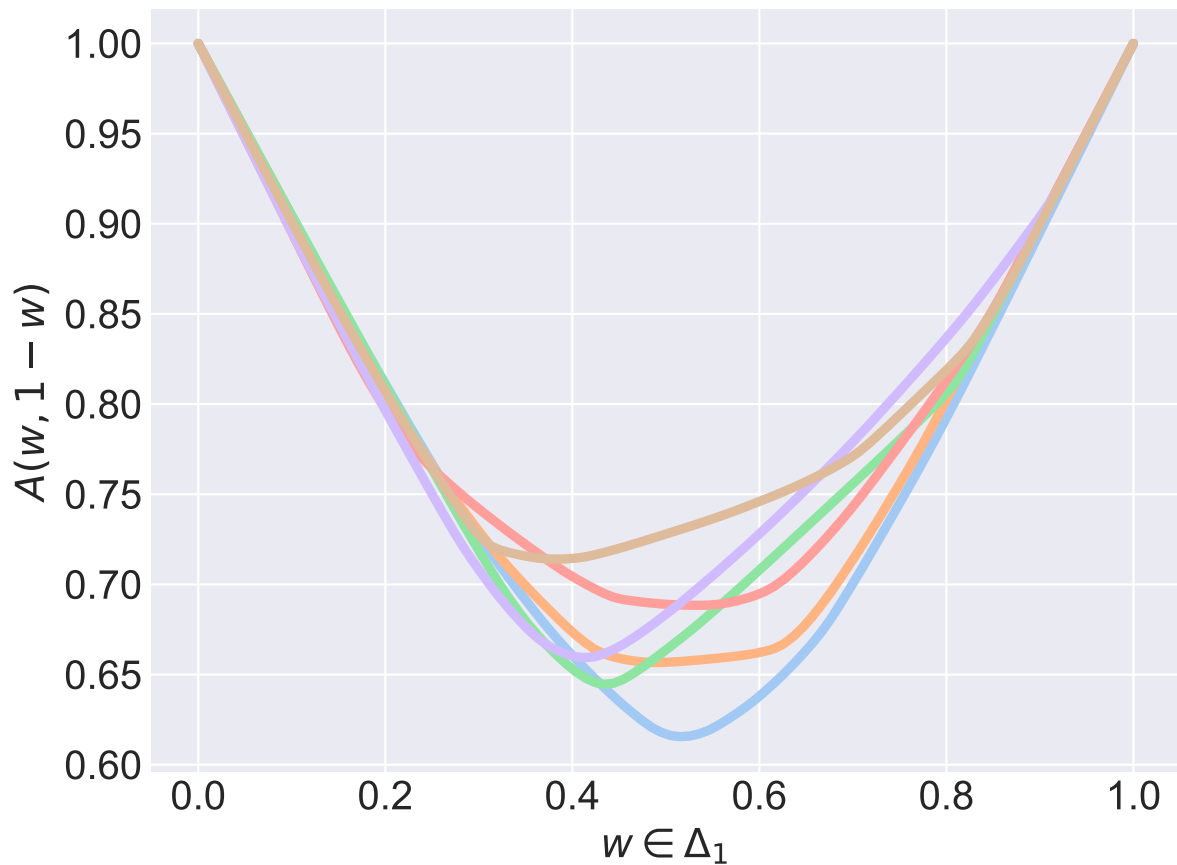

Supplement: supplementary_material [file attachment]

$d = 256$ 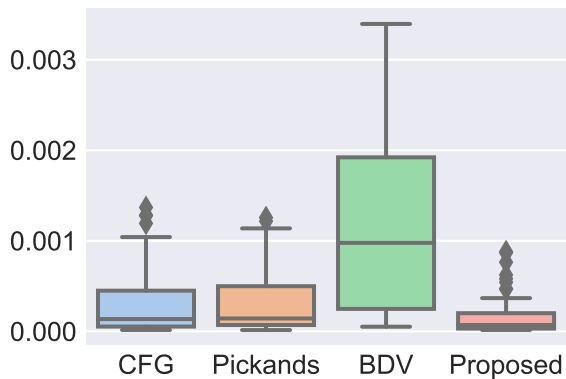 $d = 512$ 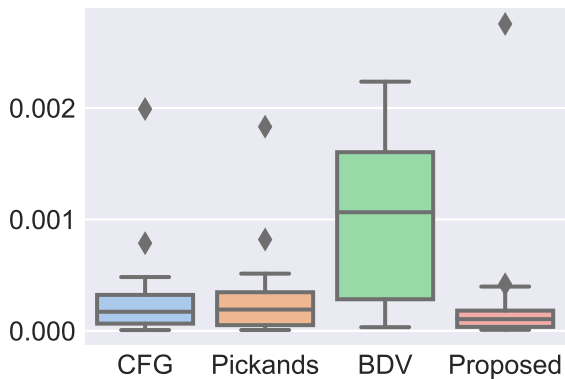 $d = 784$ 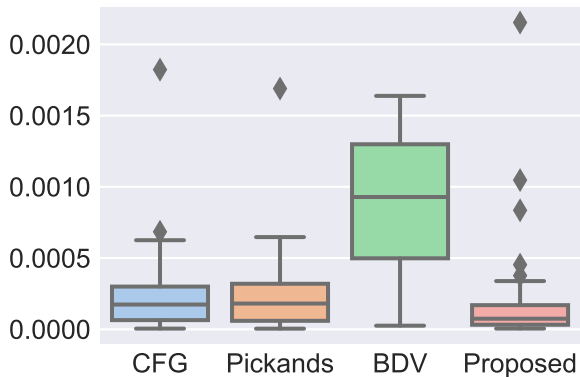 $d = 1024$ 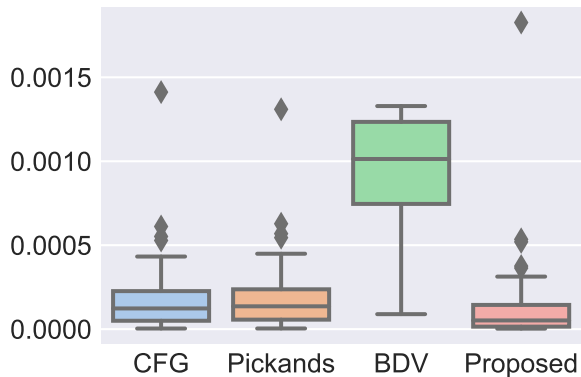

Supplement: supplementary_material [file attachment]

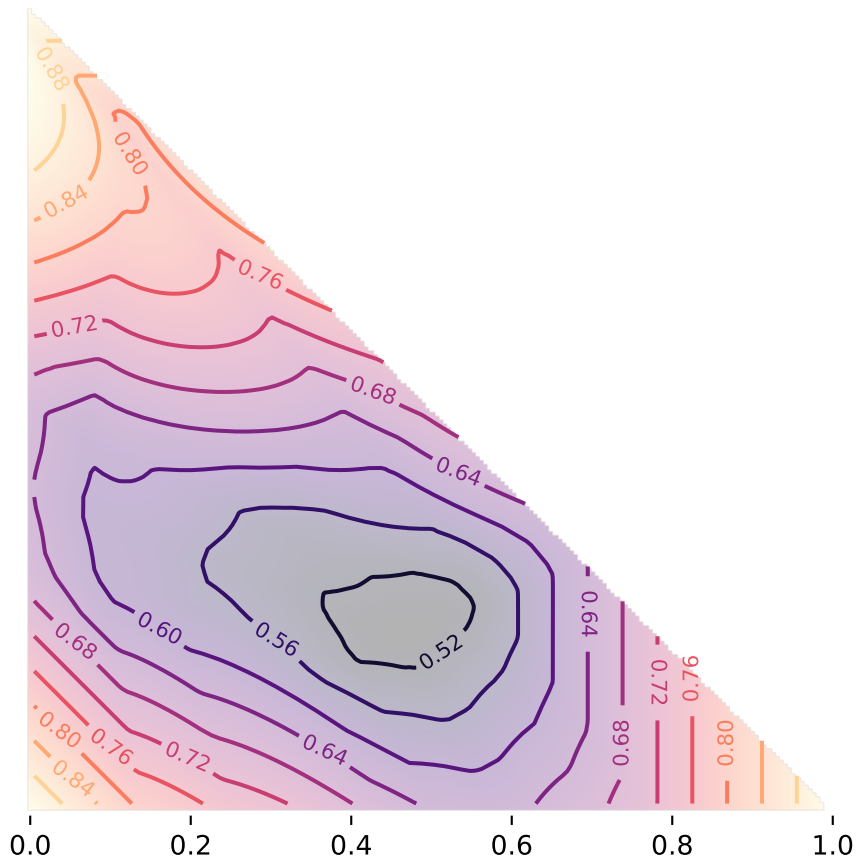

Supplement: supplementary_material [file attachment]

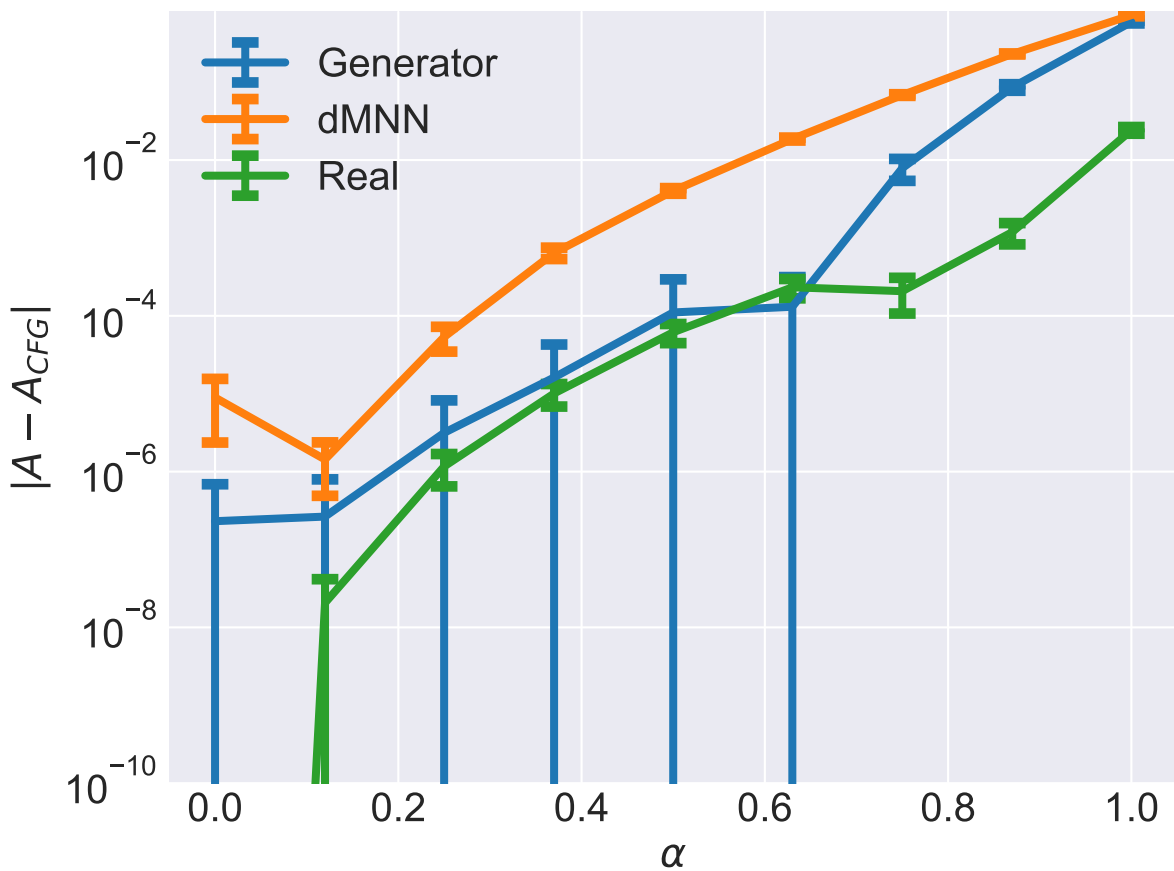

Supplement: supplementary_material [file attachment]

$d = 256$ 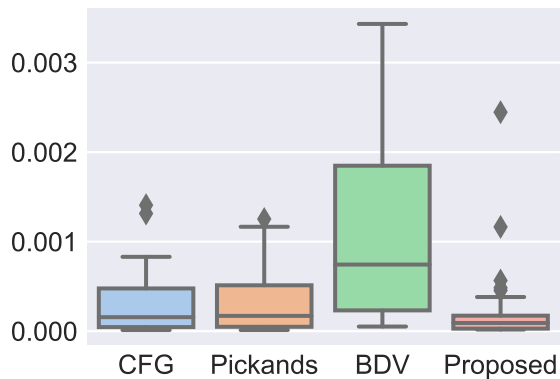 $d = 512$ 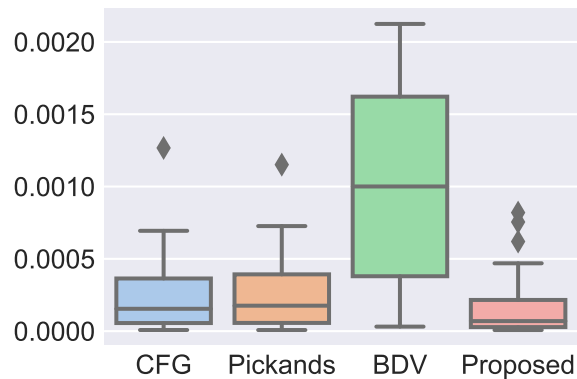 $d = 784$ 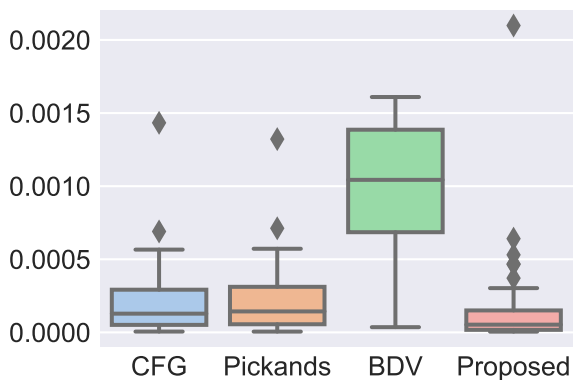 $d = 1024$ 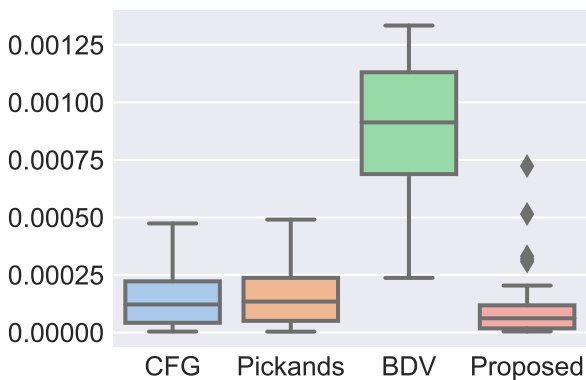

Supplement: supplementary_material [file attachment]

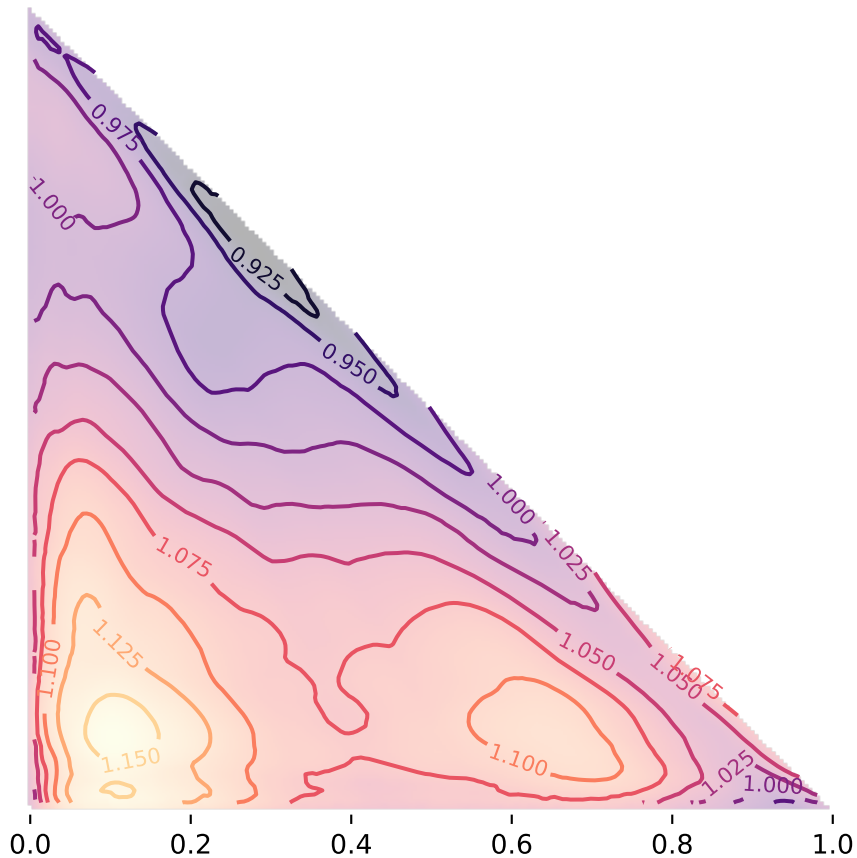

Supplement: supplementary_material [file attachment]

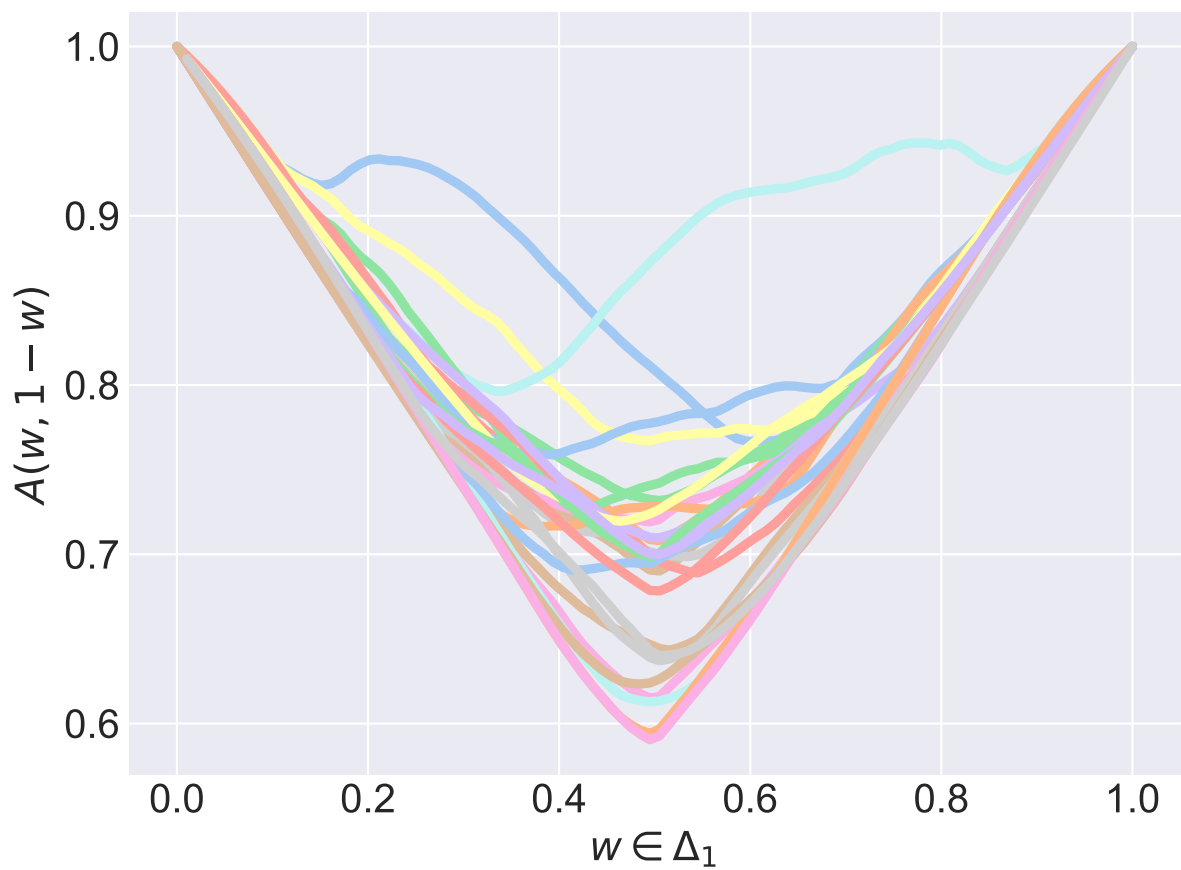

Supplement: supplementary_material [file attachment]

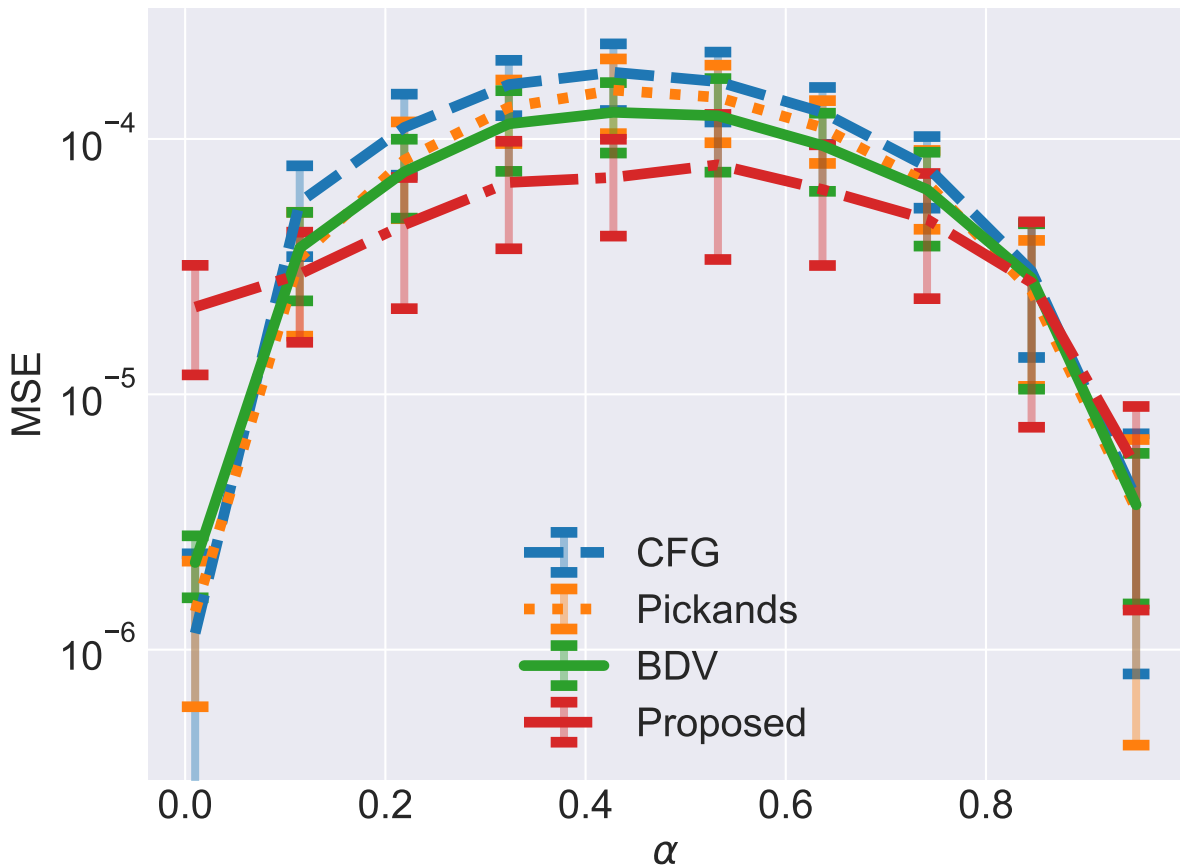

Supplement: supplementary_material [file attachment]

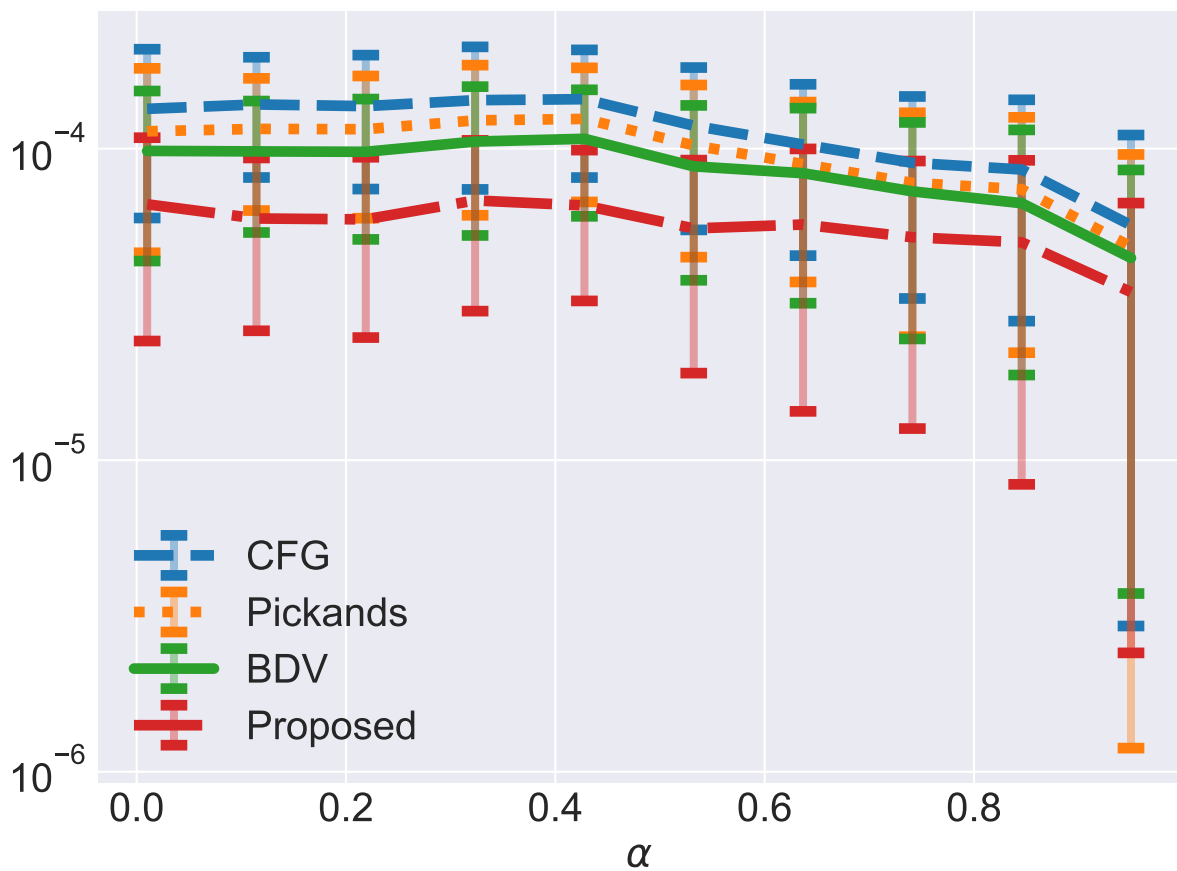

Supplement: supplementary_material [file attachment]

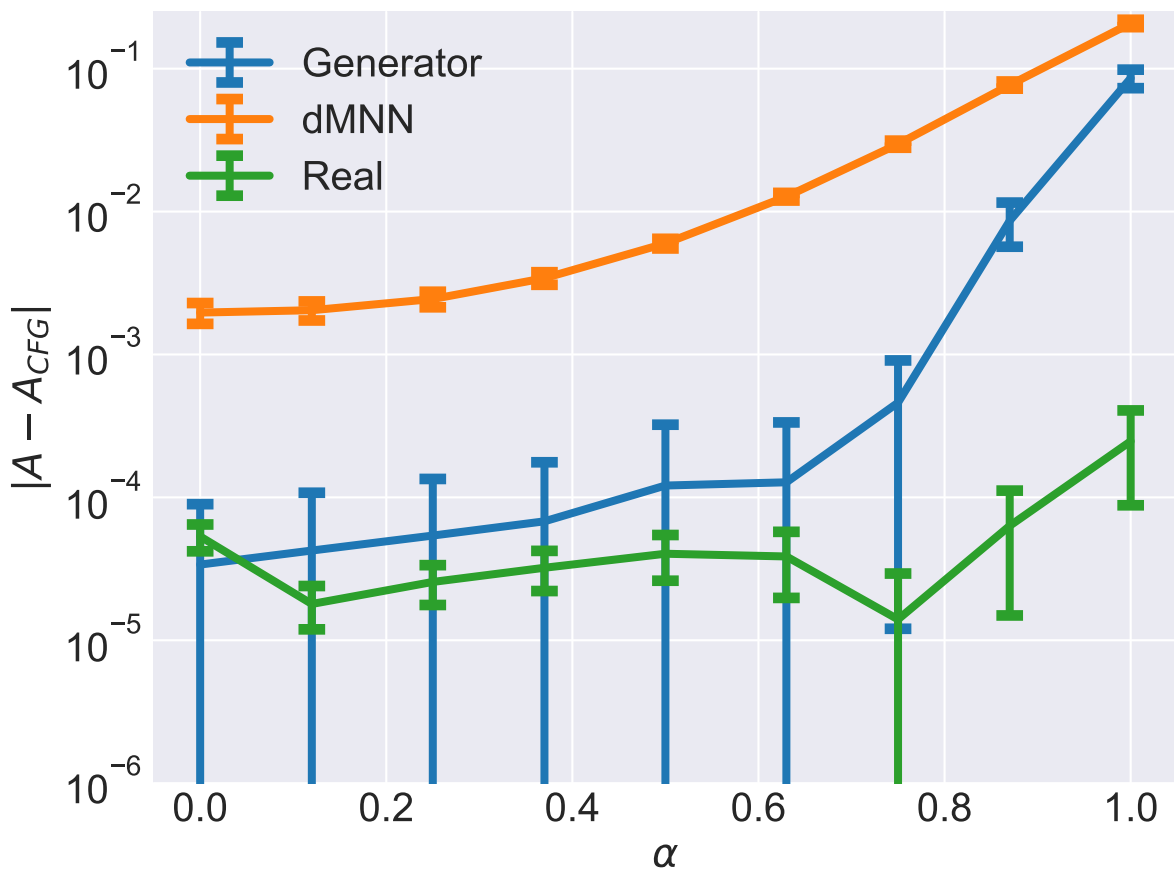

Supplement: supplementary_material [file attachment]

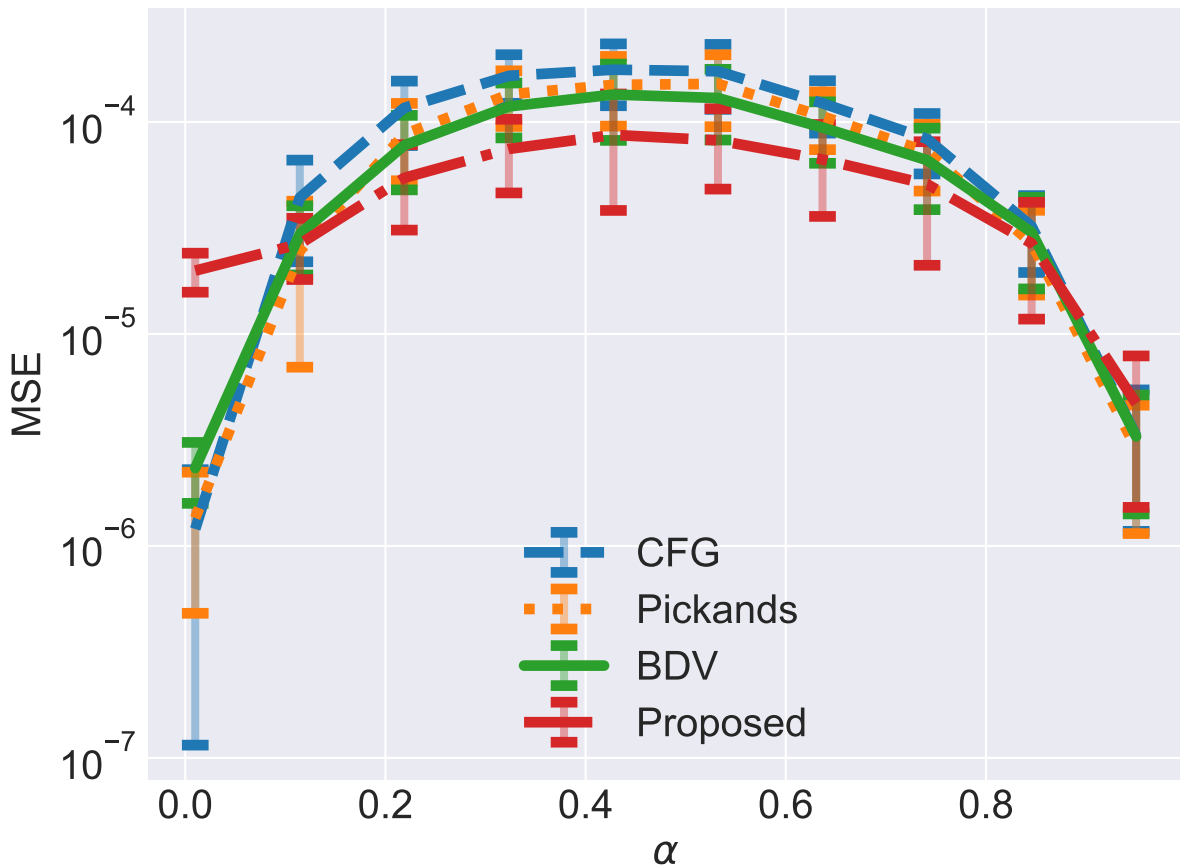

Supplement: supplementary_material [file attachment]

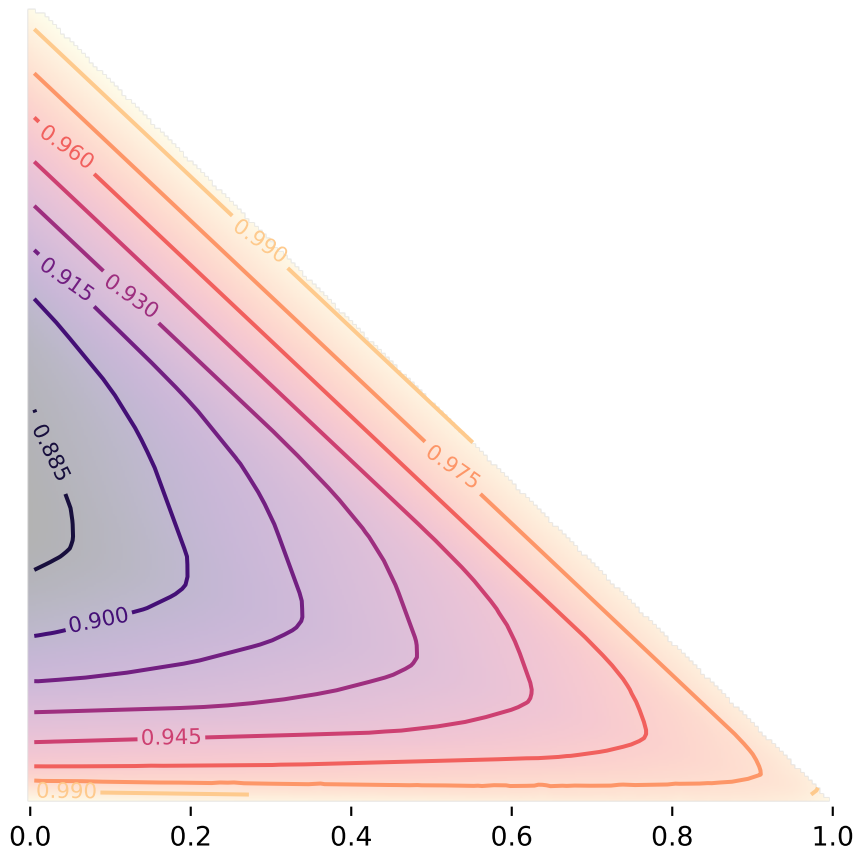

Supplement: supplementary_material [file attachment]

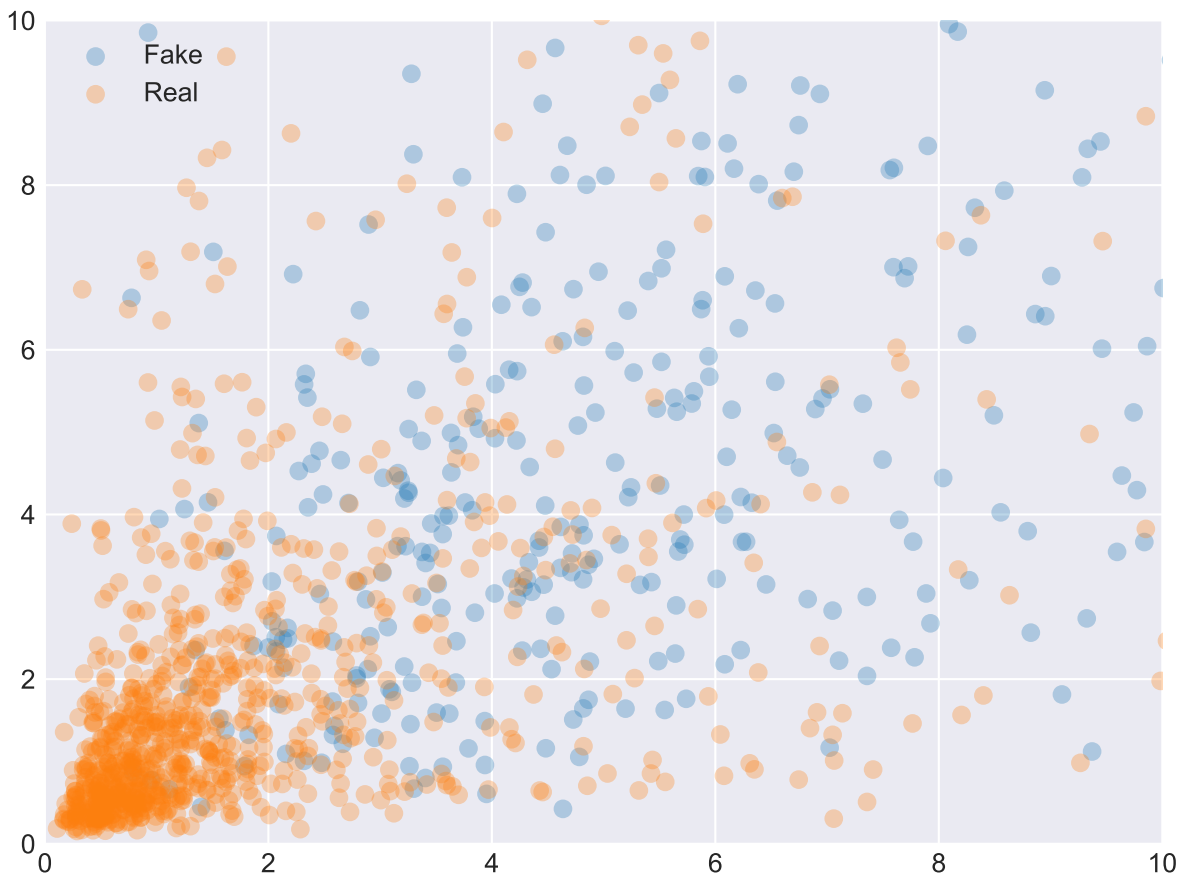

Supplement: supplementary_material [file attachment]

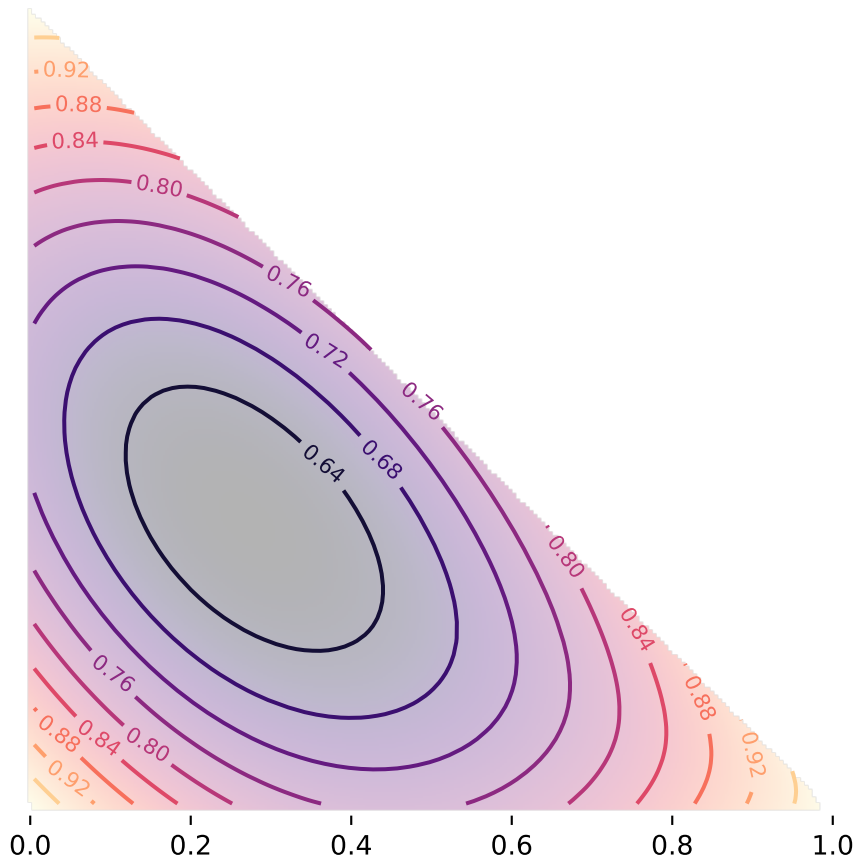

Supplement: supplementary_material [file attachment]

$d = 256$ 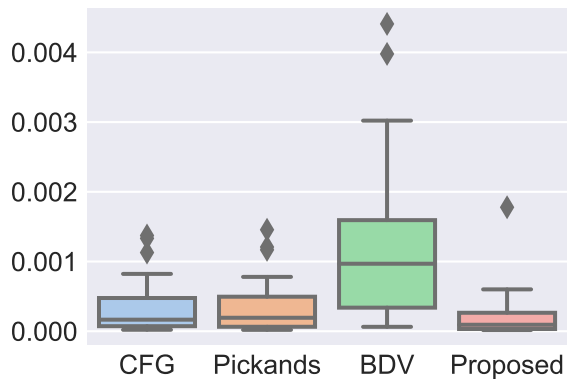 $d = 512$ 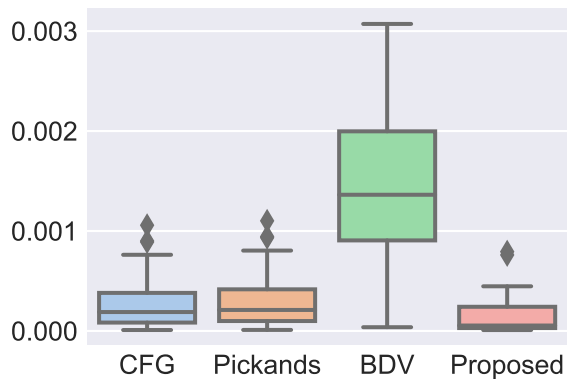 $d = 784$ 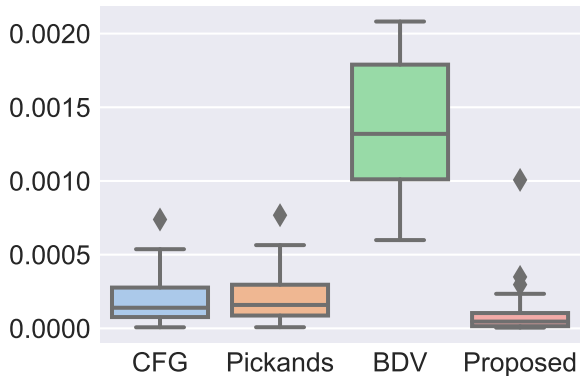 $d = 1024$ 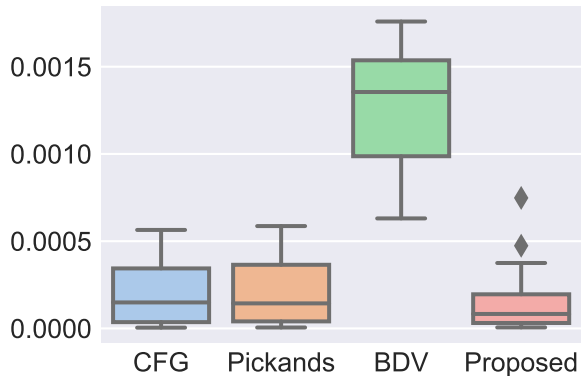

Supplement: supplementary_material [file attachment]

$\alpha = 0.25$

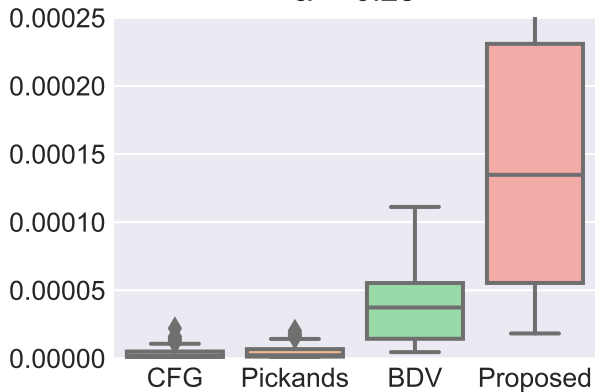

$\alpha = 0.5$

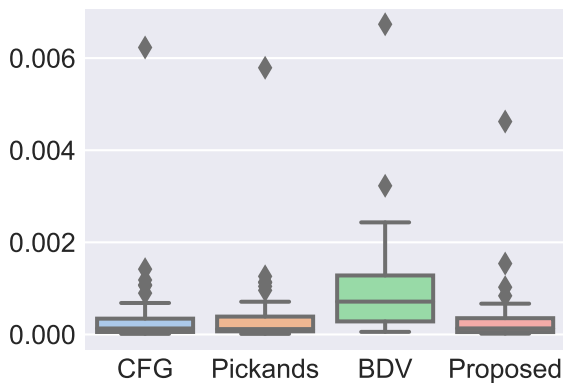

$\alpha = 0.75$

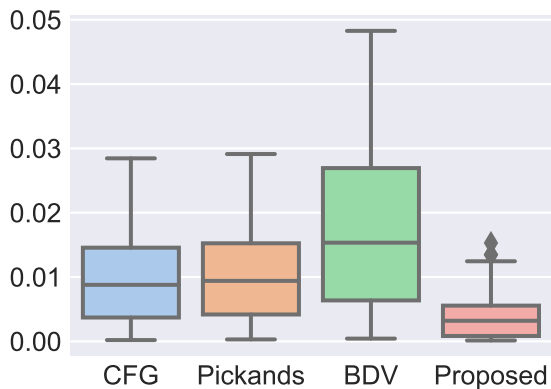

$\alpha = 1$

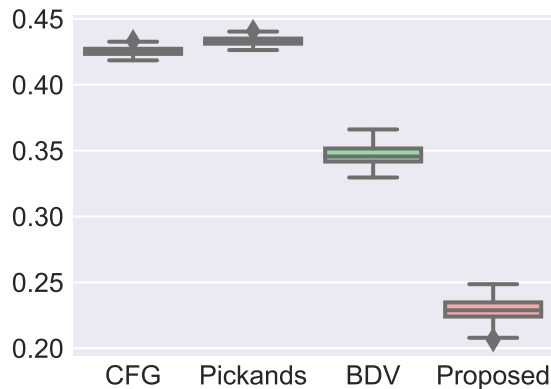

Supplement: supplementary_material [file attachment]

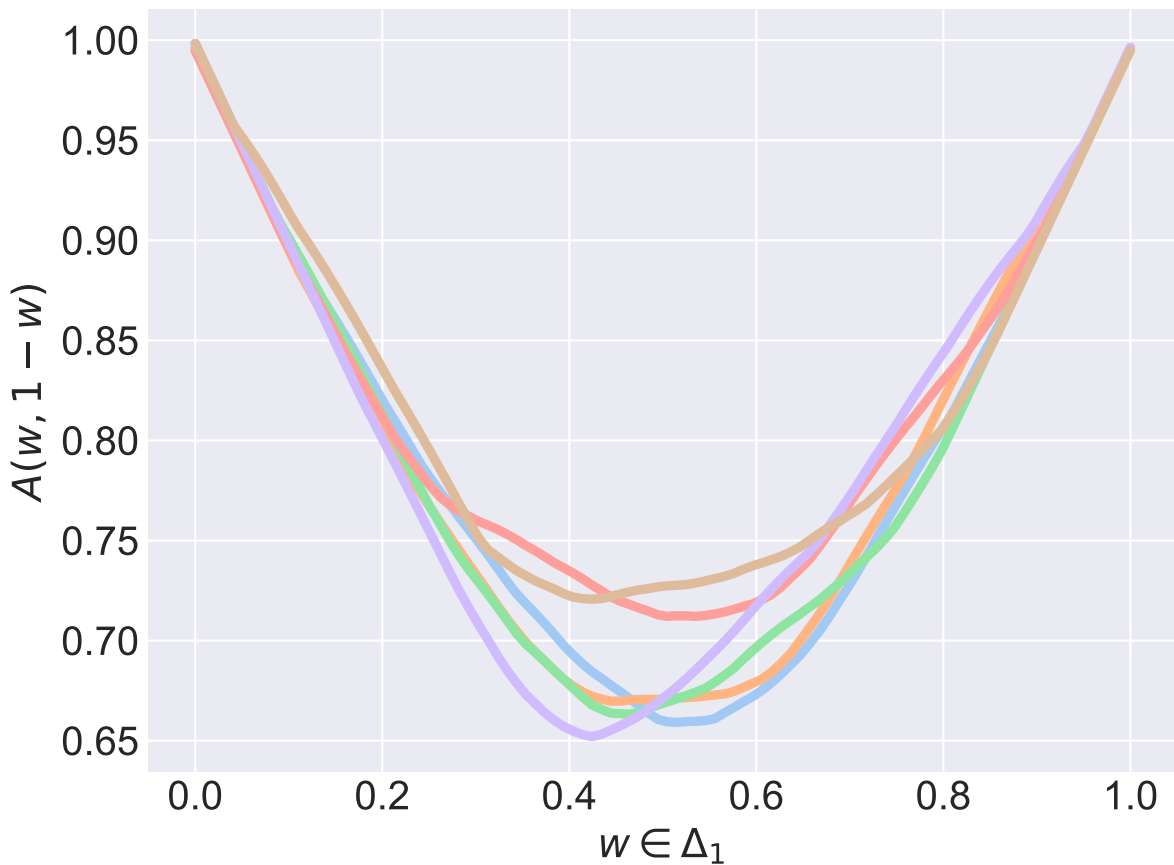

Supplement: supplementary_material [file attachment]

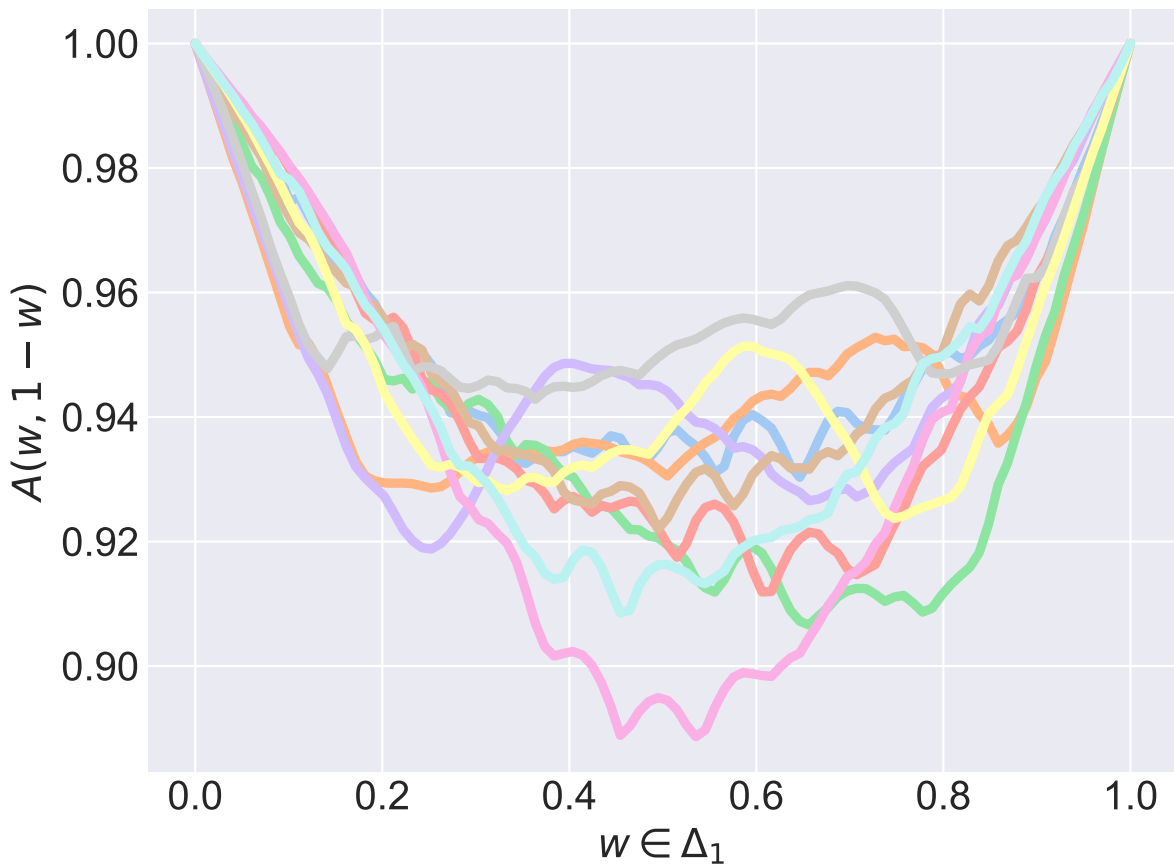

Supplement: supplementary_material [file attachment]

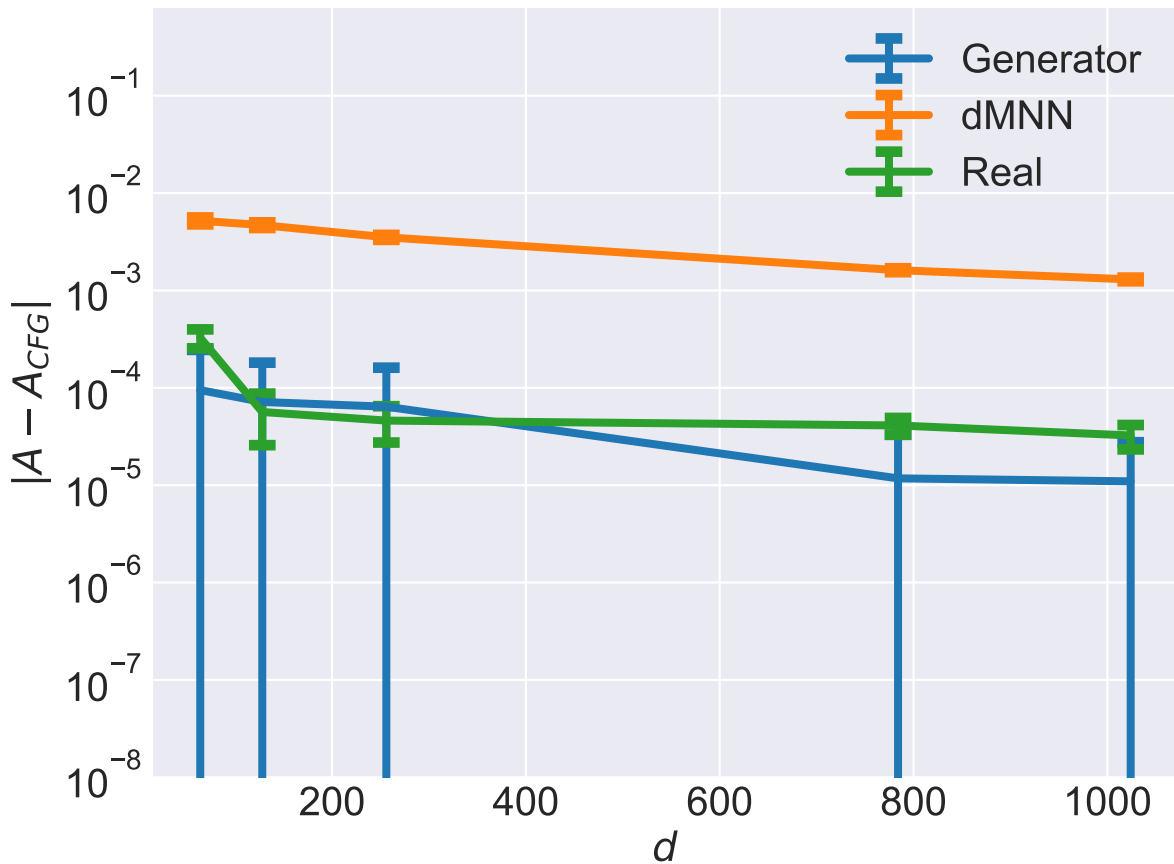

Supplement: supplementary_material [file attachment]

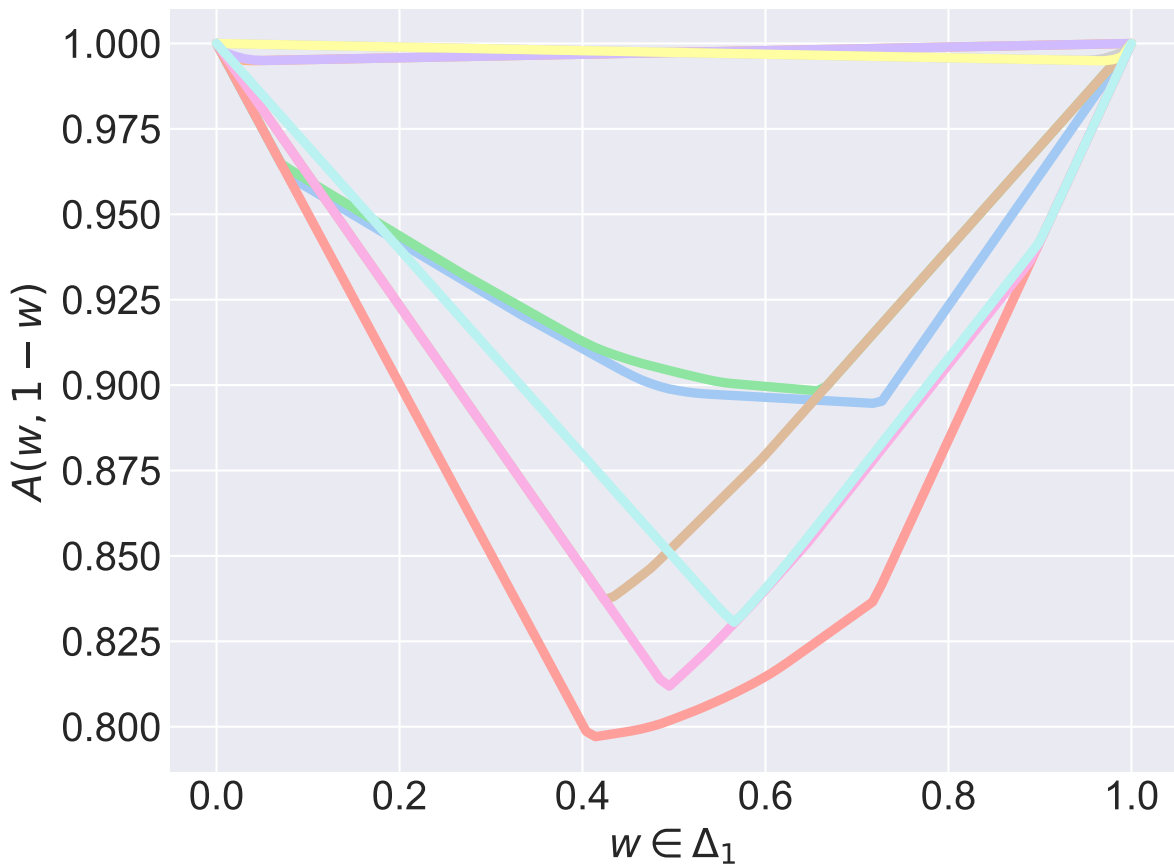

Supplement: supplementary_material [file attachment]

$\alpha = 0.25$

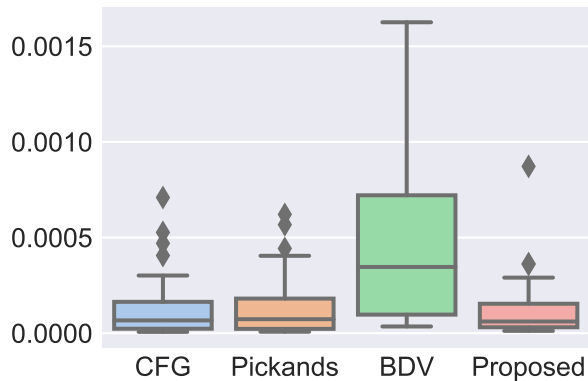

$\alpha = 0.5$

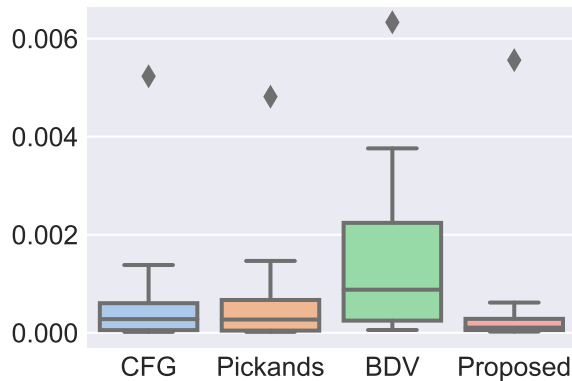

$\alpha = 0.75$

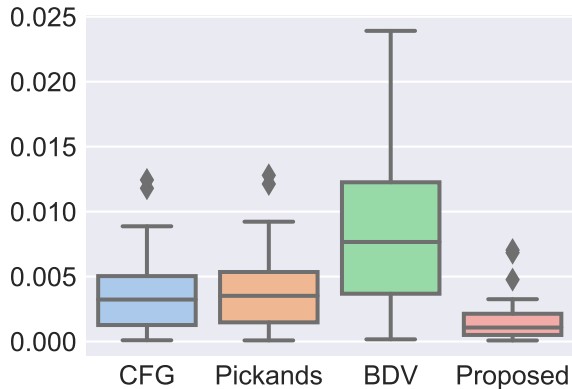

$\alpha = 1$

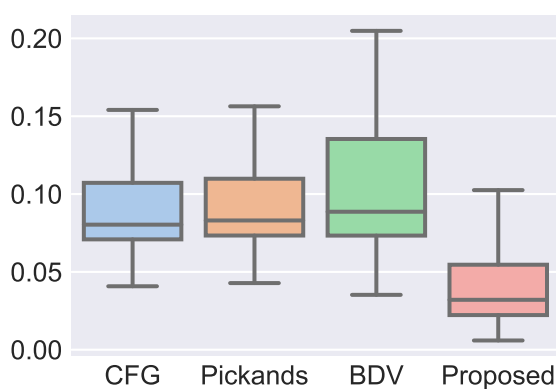

Supplement: supplementary_material [file attachment]

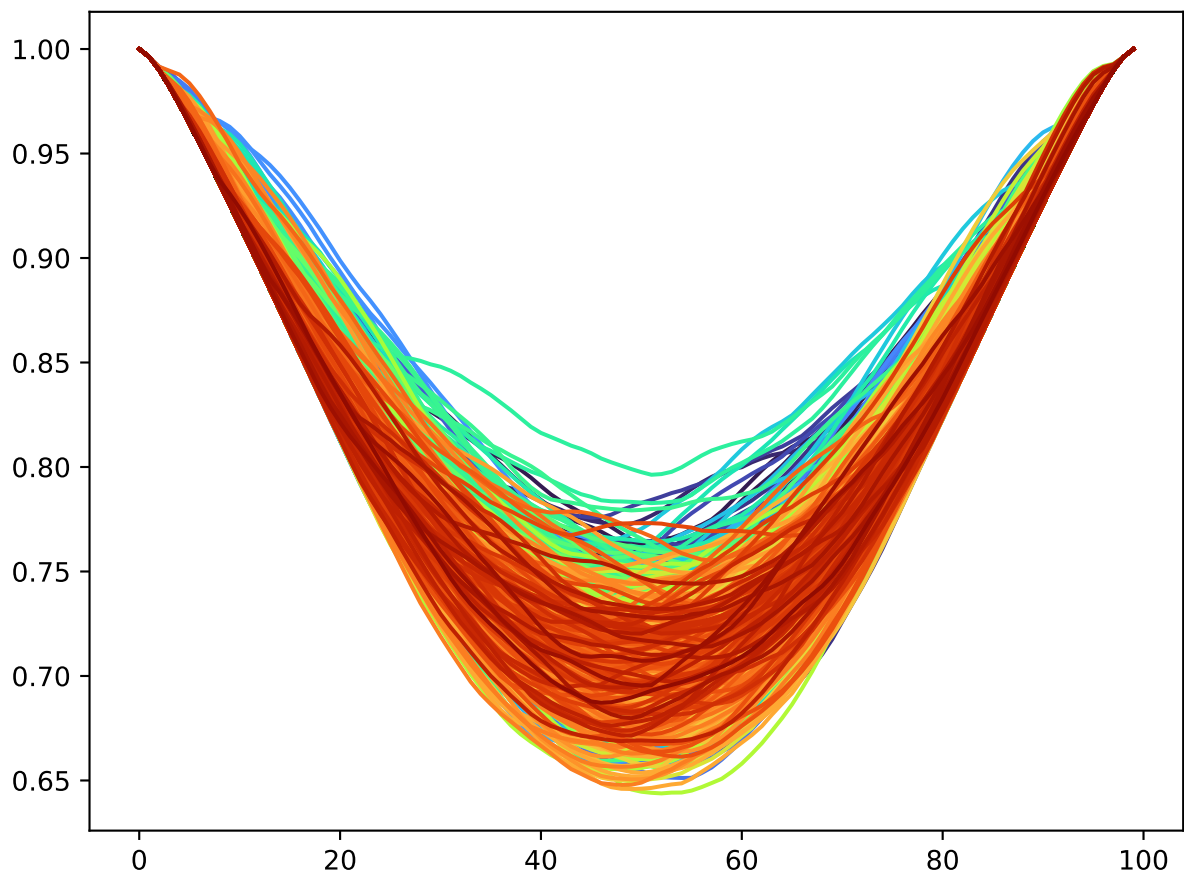

Supplement: supplementary_material [file attachment]

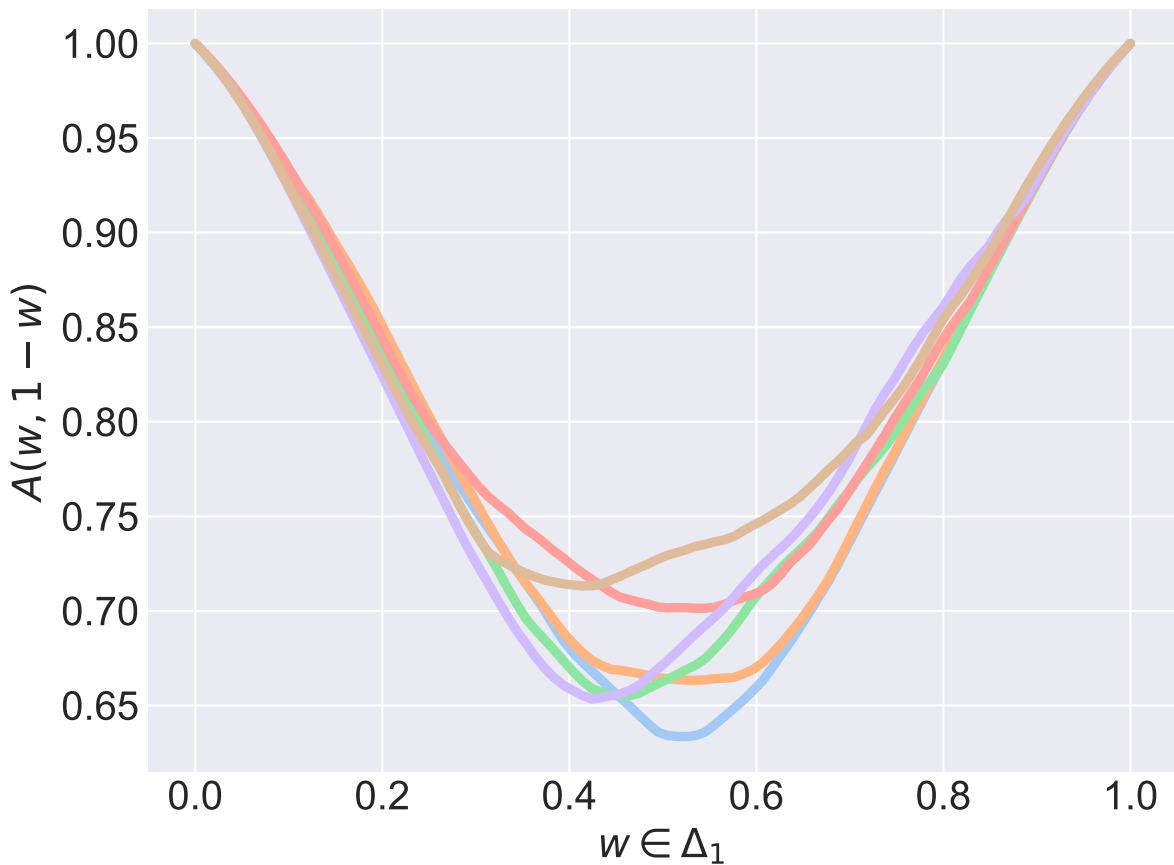

Supplement: supplementary_material [file attachment]

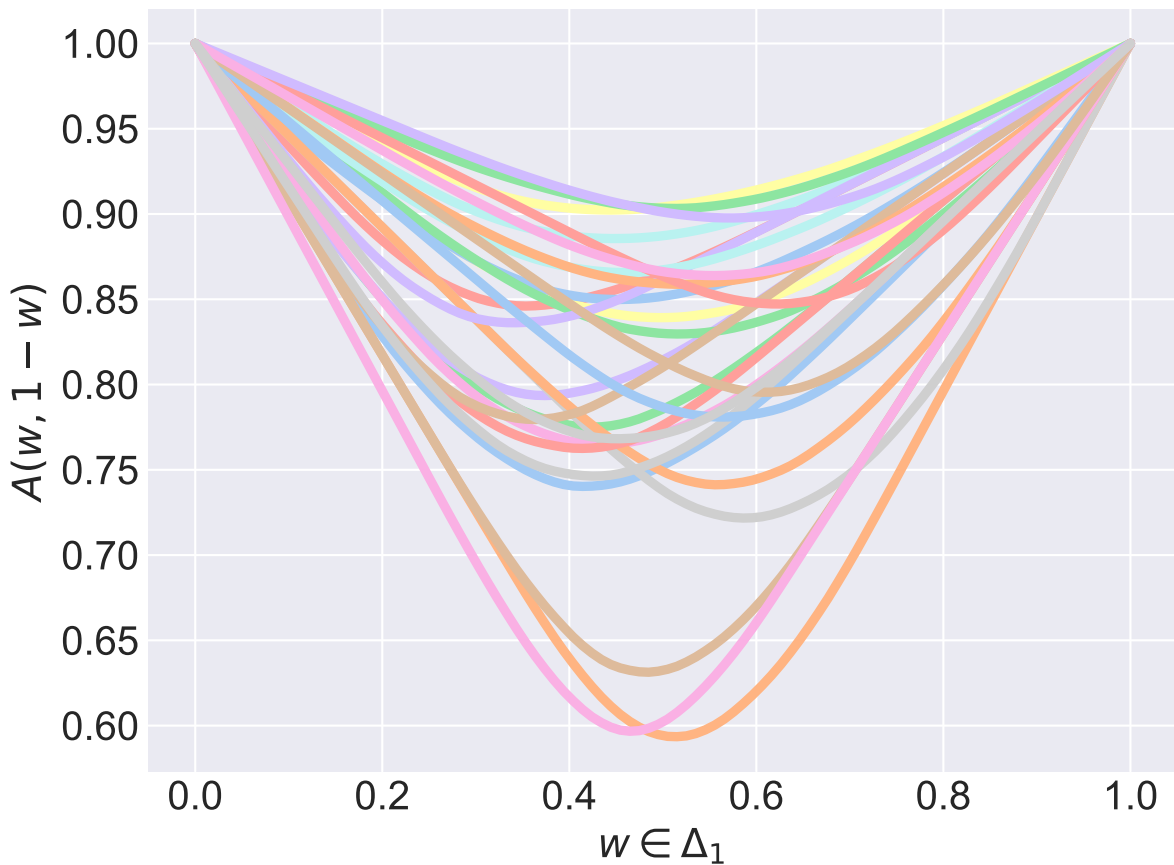

Supplement: supplementary_material [file attachment]

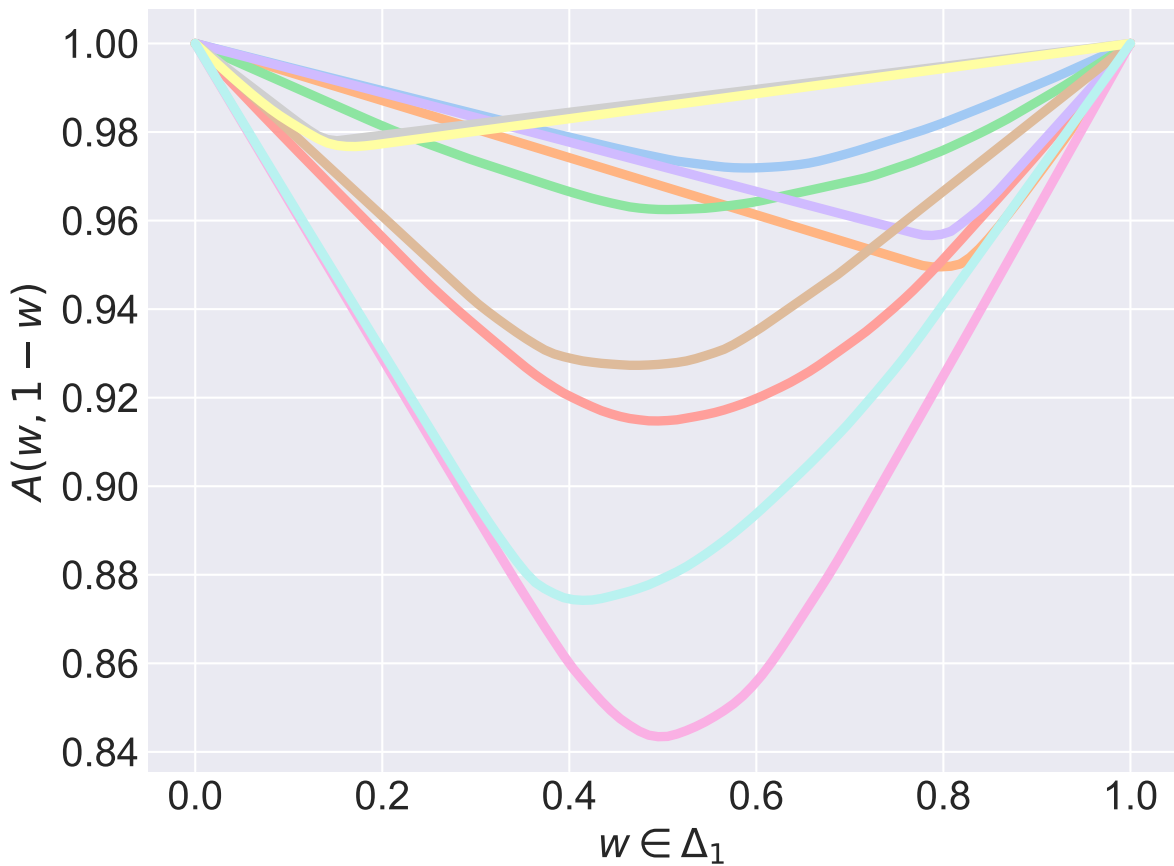

Supplement: supplementary_material [file attachment]

$\alpha = 0.25$

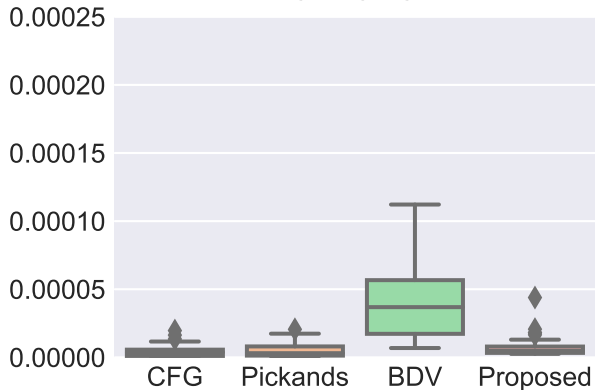

$\alpha = 0.5$

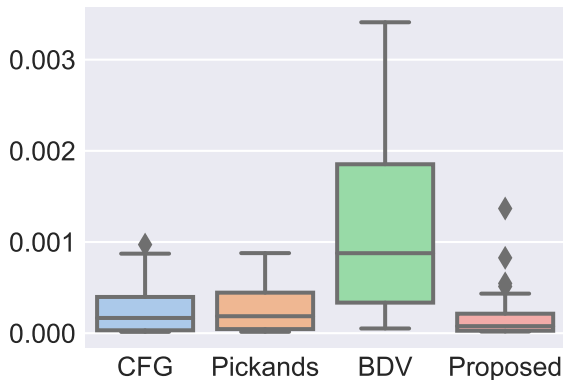

$\alpha = 0.75$

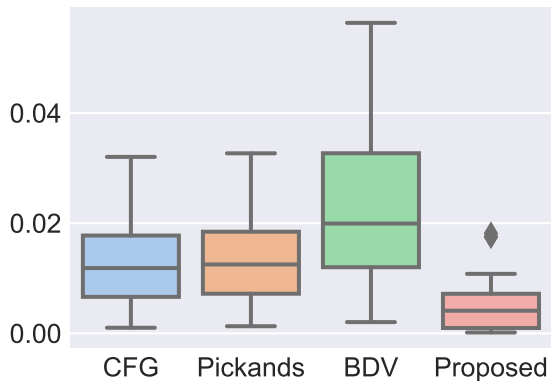

$\alpha = 1$

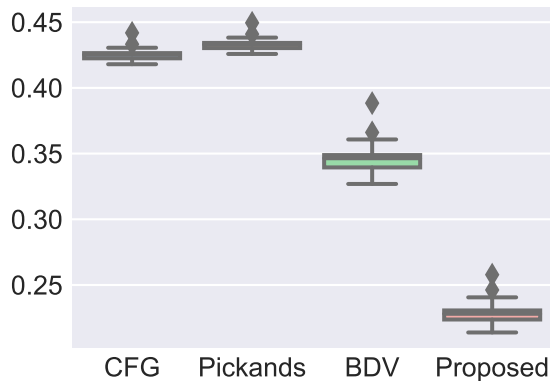

Supplement: supplementary_material [file attachment]

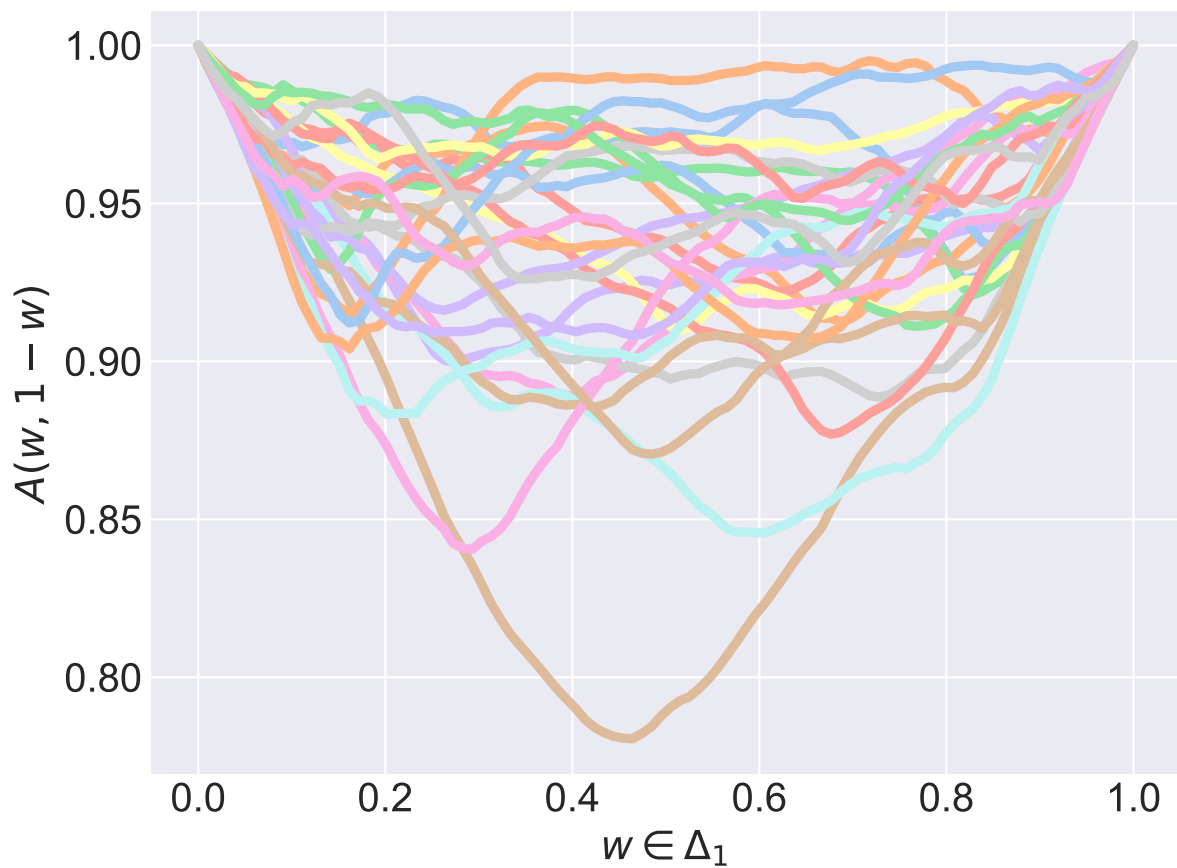

Supplement: supplementary_material [file attachment]

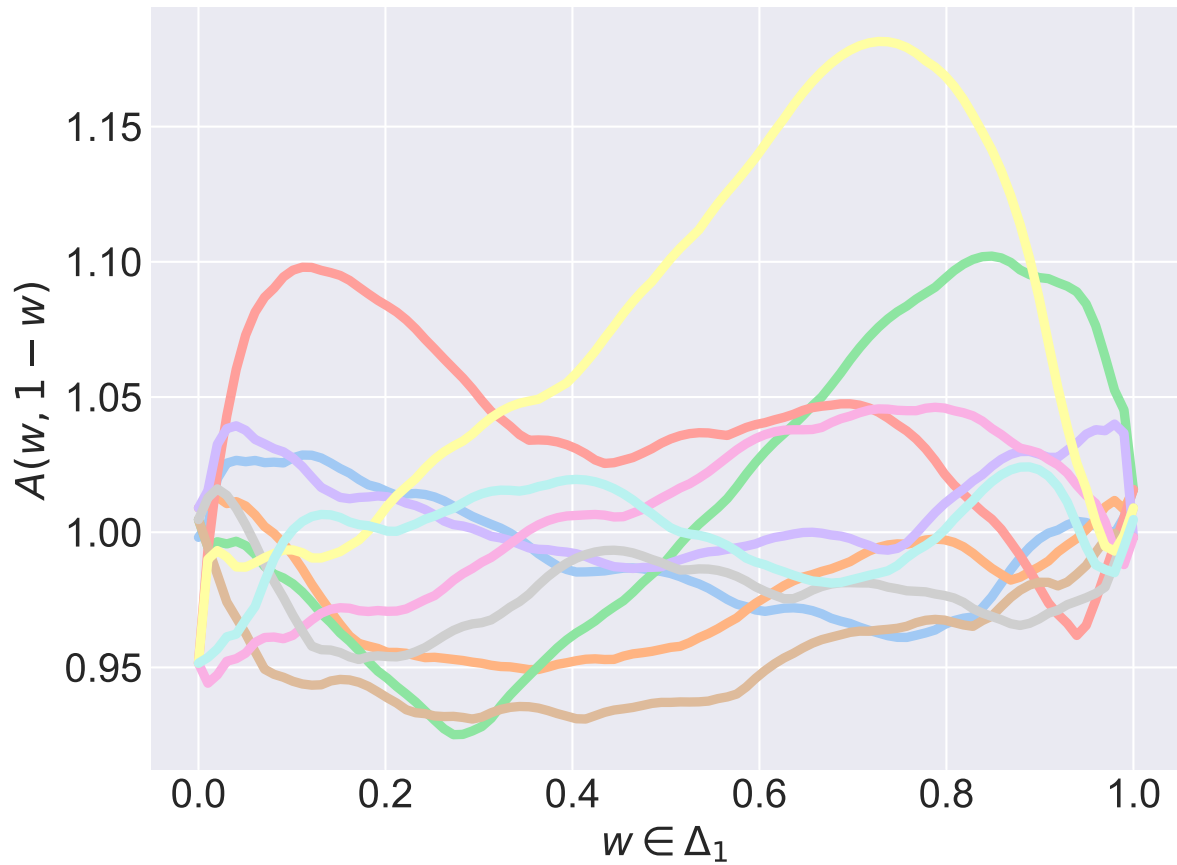

Supplement: supplementary_material [file attachment]

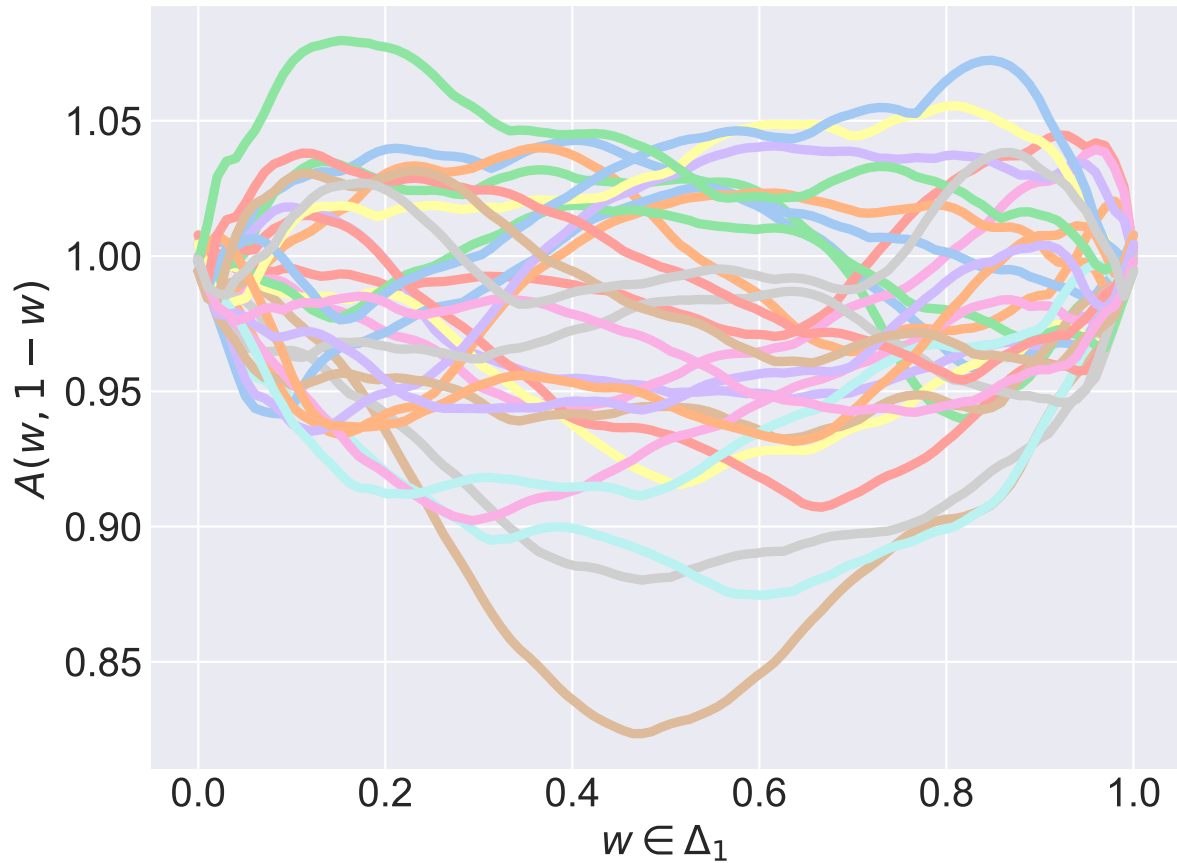

Supplement: supplementary_material [file attachment]

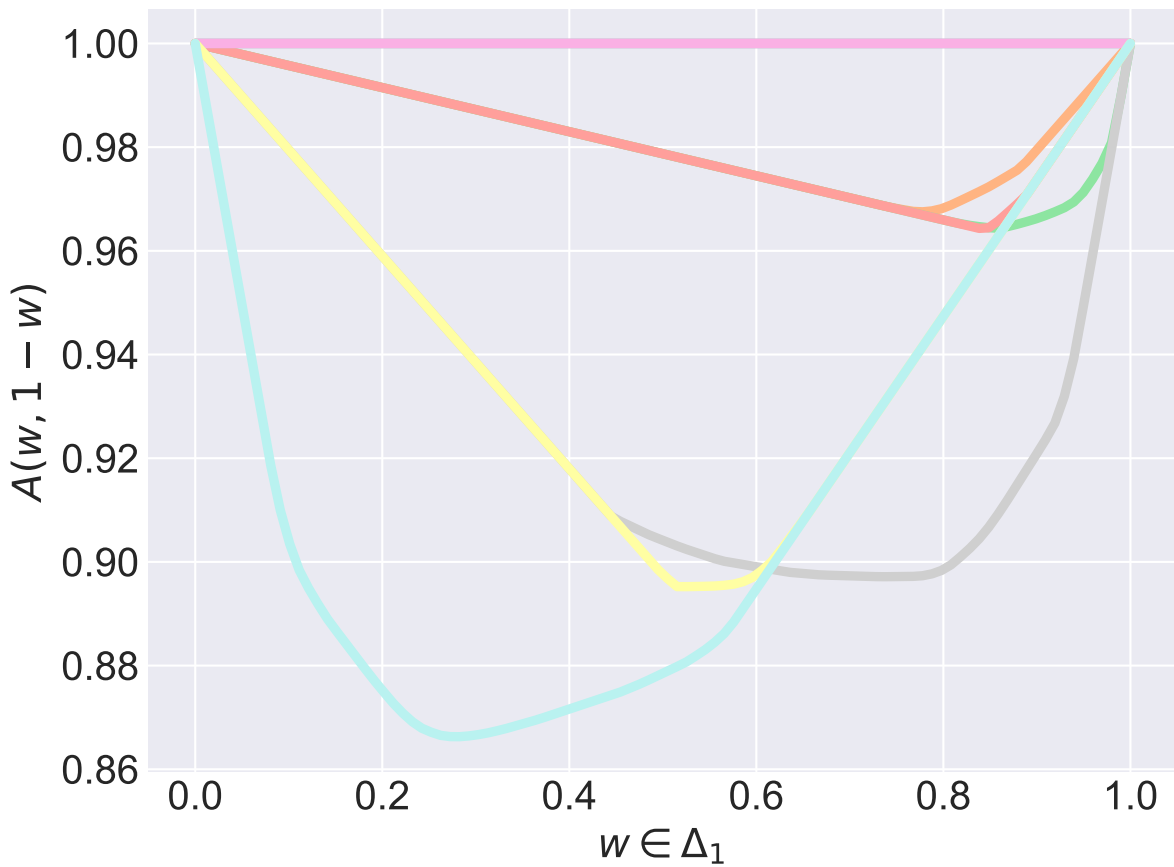

Supplement: supplementary_material [file attachment]

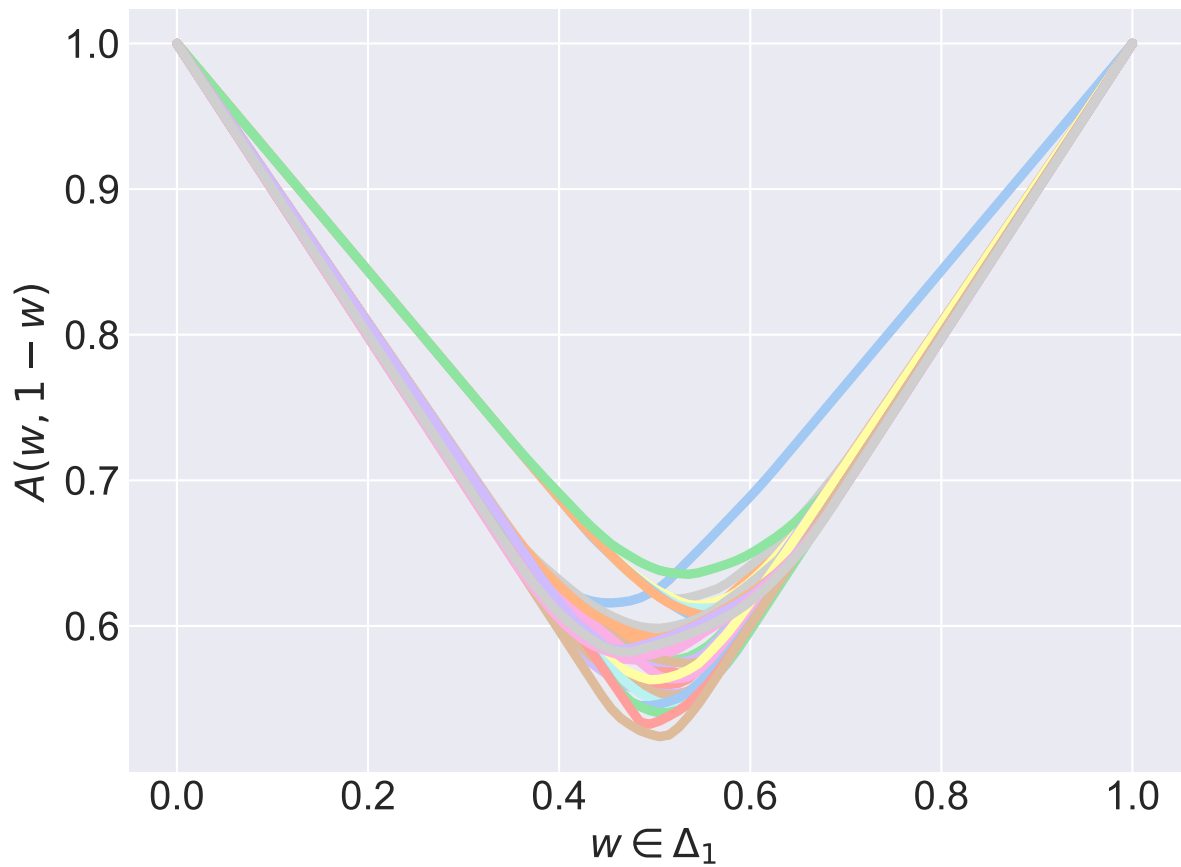

Supplement: supplementary_material [file attachment]

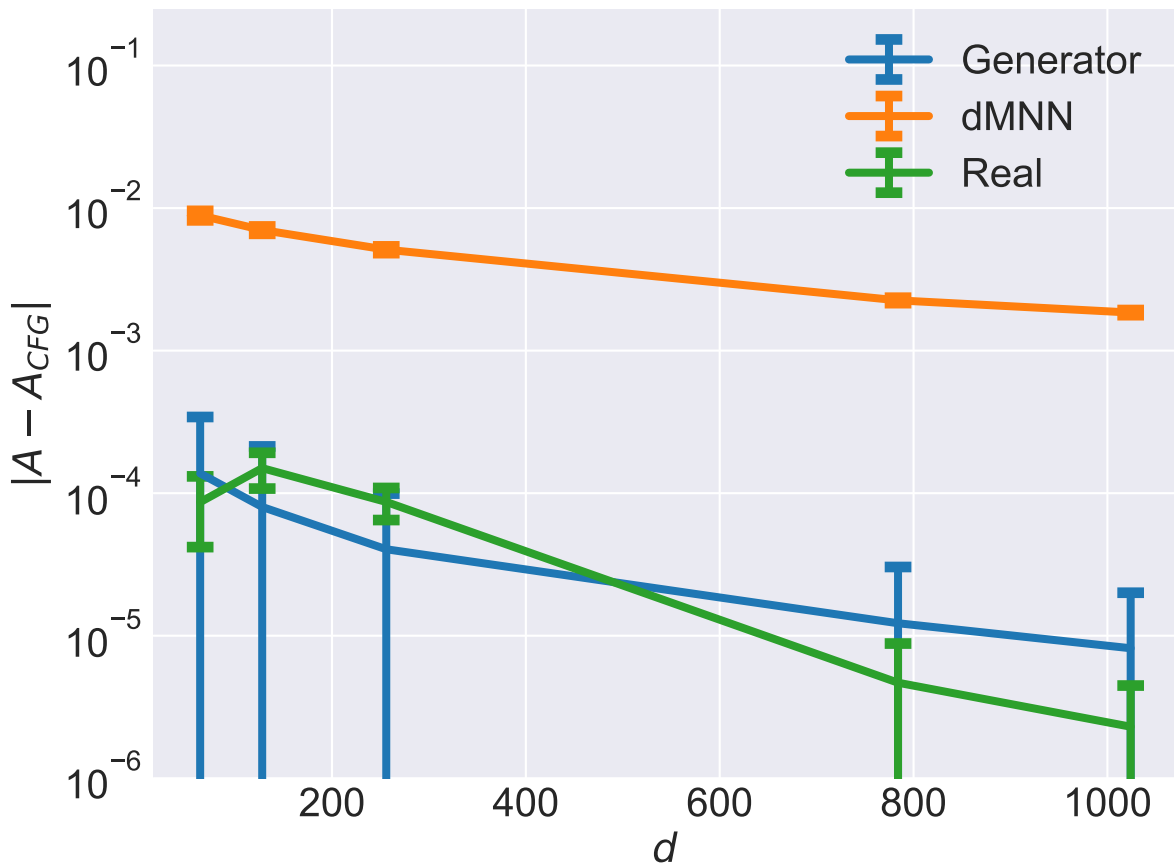

Supplement: supplementary_material [file attachment]

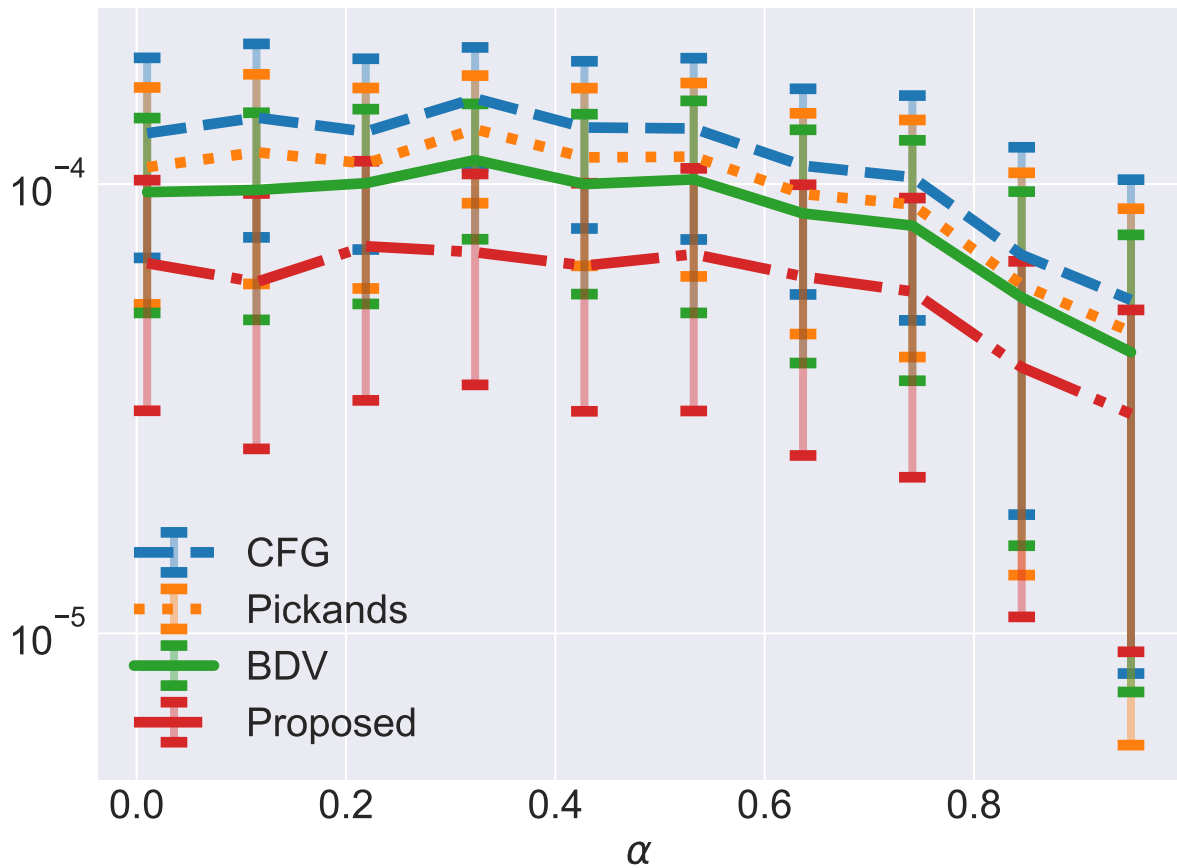

Supplement: supplementary_material [file attachment]
